# Supplementary material for: Dependence of diffusion in Escherichia coli cytoplasm on protein size, environmental conditions, and cell growth
Source: eLife. 2022 Dec 5;11:e82654. doi: 10.7554/eLife.82654 (PMC9810338; doi:10.7554/eLife.82654)
Supplement: Figure 1—figure supplement 5—source data 1. — Individual values of α from Figure 1—figure supplement 5B. [file elife-82654-fig1-figsupp5-data1.xlsx]

## Sheet: Panel A
		tD (ms)
		sfGFP	YggX-sfGFP	ClpS-wt-sfGFP	ClpS-D35A_D36A_H66A-sfGFP	FolK-sfGFP	Crr-sfGFP	UbiC-sfGFP	CoaE-sfGFP	Adk-sfGFP	Cmk-sfGFP	KdsB-sfGFP	Map-wt-sfGFP	Map-K211A_K218A_K224A_K226A-sfGFP	Map-K211E_K218E_K224E_K226E-sfGFP	MmuM-sfGFP	PanE-sfGFP	SolA-sfGFP	Pgk-sfGFP	EntC-sfGFP	AroA-sfGFP	ThrC-sfGFP	MurF-sfGFP	DsdA-sfGFP	HemN-sfGFP	PrpD-sfGFP	DnaK-wt-sfGFP	DnaK-V436F-sfGFP	MalZ-sfGFP	GlcB-sfGFP	MetE-sfGFP	LeuS-sfGFP	AcnA-sfGFP	MetH-sfGFP
		549.867	561.651	1261.45	1094.2	739.428	1138.25	1177.57	965.27	968.765	1411.09	1674.01	1769.8	1067.61	1144.52	2016.35	975.876	855.437	976.104	2269.5	1263.4	831.555	1379.32	849.749	1268.53	1840.58	2037.07	1698.24	2976.68	1408.6	1064.37	1974.67	1324.52	1465.67
		568.408	586.32	1070.03	1490.81	640.357	1177.98	1682.35	691.863	977.183	1223.78	1748.5	1928.56	980.993	1026.02	3053.18	1121.59	765.849	962.842	2398.84	1189.57	884.519	952.095	688.58	1225.5	2061.61	2463.75	1451.92	3411.27	1269.25	1434.83	1692.41	1197.84	1521.99
		653.282	635.94	873.204	1174.64	645.946	981.793	1229.96	976.209	982.592	1410.8	1546.15	1746.87	1116.01	955.742	1847.98	960.506	906.362	1269.82	1492.23	1237.95	972.435	1220.74	737.579	1281.21	1790.89	2300.7	1508.62	3526.47	1212.32	1246.97	1709.6	1449.44	1547.11
		526.201	611.338	1050.77	1264.7	681.328	1016.5	1152.22	1104.06	824.848	1056.98	1413.09	2098.93	815.857	1102.13	2980.83	1145.24	882.654	835.517	2461.58	1144.87	743.003	1012.08	816.643	1530.62	2964.05	2238.34	1281.05	2608.27	1363.86	1253.73	1808.42	1091.14	1554.29
		733.276	552.844	909.696	1062.93	758.196	995.693	1294.48	939.918	884.136	1799.43	1575.45	1425.68	811.76	1090.74	1680.34	947.941	780.187	1341.72	1960.74	1003.73	704.109	851.311	1121.46	1552.96	1814.06	1853.6	1480.27	4624.03	1278.22	1110.23	2400.66	1545.95	1348.54
		758.272	666.935	1021.58	1568.84	850.976	929.983	1184.21	827.527	705.079	1270.96	1933.64	2130.91	667.106	1072.1	1831.68	1118.42	687.455	750.065	1814.9	809.095	969.195	835.159	1115.58	1003.62	1606.11	2508.59	1827.62	3615.57	1326.59	971.516	1727.35	1245.64	1319.85
		488.992	714.202	1107.37	1586.23	782.777	1013.29	899.795	1061.9	841.488	1140.7	1573.14	1893.68	727.189	852.325	1541.32	969.015	687.548	895.884	1891.84	751.405	979.63	802.306	1056.82	1096.91	2503.26	2547.52	2322.67	3709.73	1476.44	1009.66	1362.03	1246.59	1213.95
		679.924	562.564	1201.91	1401.97	769.934	1304.63	1076.94	706.857	790.073	907.63	2213.7	1355.32	728.214	862.542	2847.57	1116.65		823.823	1984.94	732.137	981.61		1077.67	1191.66	1251.73	1986.02	1705.91	4226.51	1033.81	1007.31	1552.63	1592.18	1179.72
		695.826		1028.63	1658.56		1050.74	856.245	761.463	780.077	967.184	1538.41	2149.94	688.976	829.977	2706.31	1052.28		1055.77	1467.76	826.971	831.418		1246.57	823.752	1227.44	2429.53	1773.95	4827.95	1800.12		1411.53	1908.28	1465.54
		672.486		1103.24	1490.21		965.443	1008.08	593.122	761.307	986.682	1333.62	2664.95	812.975	828.992	1459.09	1314.18		980.67	2488.7		868.185		1124.89	1305.95	2171.04	2597.46	1713.51		1367.74		1544.66	1446.41
		722.878		964.928			867.245	961.651	770.003	789.276	981.387	1696.35	1816.9		743.642	2364.03	1014.16		864.66	1282.7		830.792		1084.43	1340.71	1741.96				1261.39		1372.41	1509.12
		529.875					1142.81	1384.33		710.642	1238.07		2140.03		793.163	2157.85	957.245		887.084	1518.8		1070.12		1254.2	1442.06	1425.22				1550.48		1504.9	1757.11
		864.23					975.364	1172.93		668.722	1196.22		2142.15			2310.42	1181.78		1232.04	1231.46		1037.75		1108.93	1341.6					1098.1		1590.02	1076.74
		722.759					1349.13	872.514		1006.68	995.931		2242.92			2578.72	980.908		934.736	1330.53		1002.07		943.834						1225.25		1270.16	1219.14
		477.653								726.222	1168.4		1392.32				1217.27		1086.24	1053.52										1245.8			1253.01
		566.863								562.634	853.089		1445.13				1046.92		952.442											1119.1			1161.18
		426.857								635.327			1747.61				1072.12																1352.66
		553.881								580.174			1603.22				873.419																1721.21
		466.149								766.912			1557.57																				1785.98
		651.869								879.256			1353.2
		653.265								809.846
		550.973								865.166
		505.751								927.551
		580.176
		530.721
		512.039
		420.19
		640.96
		651.483
		509.575
		678.921
		633.812
		588.243
		559.224
		504.285
		557.502
		503.024
		553.927
		453.016
		500.774
		478.092
		482.859
		610.994
		433.584
		459.594
		467.512
		511.838
		485.149
		483.799
		482.516
		451.979
		439.212

## Sheet: Panel B
		sfGFP	YggX-sfGFP	ClpS-wt-sfGFP	ClpS-D35A_D36A_H66A-sfGFP	FolK-sfGFP	Crr-sfGFP	UbiC-sfGFP	CoaE-sfGFP	Adk-sfGFP	Cmk-sfGFP	KdsB-sfGFP	Map-wt-sfGFP	Map-K211A_K218A_K224A_K226A-sfGFP	Map-K211E_K218E_K224E_K226E-sfGFP	MmuM-sfGFP	PanE-sfGFP	SolA-sfGFP	Pgk-sfGFP	EntC-sfGFP	AroA-sfGFP	ThrC-sfGFP	MurF-sfGFP	DsdA-sfGFP	HemN-sfGFP	PrpD-sfGFP	DnaK-wt-sfGFP	DnaK-V436F-sfGFP	MalZ-sfGFP	GlcB-sfGFP	MetE-sfGFP	LeuS-sfGFP	AcnA-sfGFP	MetH-sfGFP
		0.899283	0.84225	0.75548	0.94315	0.8798	0.886783	0.91535	0.91585	0.869167	0.808767	0.864133	0.771817	0.865625	0.86806	0.716533	0.890583	0.823733	0.92845	0.835383	0.862433	0.90916	0.786917	0.96195	0.821767	0.894117	0.77275	0.859583	0.780917	0.8641	0.898967	0.88375	0.872667	0.79676
		0.93515	0.86854	0.7232	0.854017	0.8462	0.805517	0.855083	0.863583	0.897433	0.833583	0.795767	0.815633	0.801167	0.79844	0.6859	0.842133	0.769983	1.0116	0.828383	0.88445	0.903333	0.82205	0.9281	0.85225	0.836833	0.7657	0.821433	0.795517	0.79685	0.8709	0.8551	0.8726	0.820767
		0.8684	0.848817	0.76532	0.805417	0.924467	0.7993	0.915817	0.84105	0.909733	0.834817	0.8439	0.768817	0.790533	0.7664	0.693067	0.8462	0.83975	0.89835	0.8264	0.854267	0.888767	0.8023	0.918617	0.885567	0.840767	0.74365	0.808767	0.796225	0.869867	0.892633	0.859117	0.883483	0.7752
		0.881433	0.837083	0.80465	0.819583	0.8717	0.934667	0.88325	0.833117	0.858117	0.915567	0.8289	0.774067	0.881983	0.818967	0.75225	0.849917	0.802817	0.90175	0.8227	0.821867	0.860267	0.871283	0.826533	0.86265	0.830783	0.755533	0.844733	0.837333	0.83465	0.8393	0.84225	0.861667	0.772483
		0.87565	0.87125	0.722667	0.888967	0.8597	0.866583	0.8508	0.83715	0.851367	0.779817	0.83318	0.81464	0.8482	0.838475	0.74784	0.8116	0.823533	0.92215	0.796783	0.865833	0.86545	0.8579	0.809867	0.905967	0.835967	0.780067	0.831067	0.73856	0.916667	0.850733	0.8292	0.8208	0.818867
		0.874417	0.862483	0.81688	0.876017	0.8382	0.849583	0.83	0.846217	0.892783	0.933867	0.85716	0.81558	0.891783	0.808967	0.7346	0.90932	0.83195	0.881467	0.838367	0.907433	0.884117	0.89618	0.924333	0.81035	0.863417	0.757433	0.83835	0.72058	0.8952	0.8597	0.924283	0.869817	0.85915
		0.876067	0.877533	0.771367	0.82605	0.839417	0.8815	0.85985	0.854083	0.8788	0.880583	0.855483	0.77388	0.825117	0.832067	0.7116	0.87895	0.86925	0.889883	0.815025	0.850117	0.855433	0.8995	0.789883	0.868967	0.8096	0.730183	0.799333	0.73196	0.830333	0.8509	0.81725	0.861183	0.812517
		0.818383	0.826917	0.72576	0.835167	0.882333	0.8547	0.847717	0.86195	0.852317	0.851533	0.817767	0.755733	0.88935	0.803617	0.6927	0.883733		0.91145	0.80538	0.87185	0.825633		0.91285	0.867417	0.8199	0.785617	0.839317	0.7509	0.895033	0.883433	0.89595	0.856817	0.7801
		0.872083		0.72068	0.8212		0.900617	0.83585	0.906417	0.89685	0.82604	0.877033	0.8414	0.8437	0.879767	0.70782	0.881633		0.8989	0.78116	0.84345	0.831883		0.88355	0.898417	0.867967	0.7138	0.8418	0.76676	0.890017		0.883933	0.901133	0.835567
		0.844367		0.7661	0.86184		0.867583	0.831167	0.87265	0.824817	0.89385	0.856067	0.786167	0.8406	0.883333	0.7892	0.855533		0.82535	0.75232		0.850217		0.8876	0.819667	0.793633	0.765567	0.851983		0.86125		0.851375	0.83475
		0.86645		0.694567			0.87775	0.878183	0.930517	0.893917	0.876167	0.85495	0.8602		0.8316	0.7489	0.817883		0.881117	0.79604		0.87605		0.891767	0.85445	0.820467				0.82785		0.887633	0.912883
		0.8202					0.883133	0.88355		0.882267	0.910317		0.87714		0.875417	0.7603	0.84205		0.8827	0.869283		0.853017		0.88672	0.894	0.824433				0.84455		0.8271	0.846367
		0.909367					0.880983	0.889633		0.89095	0.90745		0.8152			0.72092	0.7905		0.856267	0.857		0.8559		0.94865	0.82315					0.8599		0.888133	0.833783
		0.84478					0.842467	0.900067		0.88285	0.8789		0.7769			0.759133	0.805817		0.87135	0.831417		0.876383		0.893167						0.872233		0.8598	0.826867
		0.8545								0.909833	0.90514		0.857483				0.8324		0.842633	0.8145										0.832567			0.8729
		0.827617								0.870867	0.87704		0.820483				0.832767		0.924267											0.861667			0.84
		0.8334								0.874833			0.835817				0.808833																0.91285
		0.842583								0.8931			0.82575				0.8736																0.836267
		0.8625								0.865517			0.789367																				0.841817
		0.8398								0.873917			0.787683
		0.862383								0.881217
		0.892067								0.871417
		0.89525								0.8626
		0.8877
		0.817983
		0.8385
		0.837783
		0.80785
		0.8241
		0.84475
		0.8456
		0.97095
		0.814517
		0.946733
		0.8668
		0.905783
		0.890883
		0.869367
		0.814033
		0.890133
		0.853983
		0.87208
		0.828867
		0.744867
		0.82355
		0.810083
		0.802283
		0.82572
		0.850583
		0.834
		0.825983
		0.886933
