# Supplementary material for: Dependence of diffusion in Escherichia coli cytoplasm on protein size, environmental conditions, and cell growth
Source: eLife. 2022 Dec 5;11:e82654. doi: 10.7554/eLife.82654 (PMC9810338; doi:10.7554/eLife.82654)
Supplement: Figure 1—figure supplement 6—source data 1. [file elife-82654-fig1-figsupp6-data1.xlsx]

## Sheet: Panel B
	DsdA-sfGFP
	1-component		2-components
	α	tD (ms)	α	tD (ms)
	0.96195	1176.82	0.97965	1289.35
	0.9281	1452.26	0.934933	1599.06
	0.918617	1355.79	0.920367	1483.93
	0.826533	1224.53	0.754033	1318.75
	0.809867	891.697	0.798683	953.727
	0.924333	896.398	0.91595	922.868
	0.789883	946.232	0.776117	1020.37
	0.91285	927.929	0.90305	962.699
	0.88355	802.204	0.881433	850.84
	0.8876	888.975	0.891517	949.279
	0.891767	922.147	0.897267	987.466
	0.88672	797.318	0.891067	863.234
	0.94865	901.768	0.906767	922.979
	0.893167	1059.51	0.9051	1164.19
