# Supplementary material for: Dependence of diffusion in Escherichia coli cytoplasm on protein size, environmental conditions, and cell growth
Source: eLife. 2022 Dec 5;11:e82654. doi: 10.7554/eLife.82654 (PMC9810338; doi:10.7554/eLife.82654)
Supplement: Figure 1—figure supplement 7—source data 1. — Individual values of α and measurements of cell length from Figure 1—figure supplement 7B. Individual values of 1/τD and measurements of cell width from Figure 1—figure supplement 7C. Individual values of α and measurements of cell width from Figure 1—figure supplement 7D. [file elife-82654-fig1-figsupp7-data1.xlsx]

## Sheet: Panel A
	1/tD (s-1)	Cell length (mm)
	1805.29	5.4
	2207.43	5.5
	1996.91	4.7
	2091.65	6.8
	2071	6
	1577.76	5.9
	1699.98	6.1
	1788.19	6.2
	1983.01	6.3
	1793.71	5.3
	1987.98	6.4
	1560.16	5.5
	1534.96	6.1
	1962.42	6.2
	1472.92	5.1
	1977.26	5.4
	1723.62	6
	1884.23	5.5
	1952.98	7.1
	2379.88	5.4
	2145.23	4.5
	1534.05	4.4
	1530.77	4.7
	1814.97	5.3
	2093.57	5.8
	1764.1	5.5
	2342.71	5.3
	1805.44	5.1
	1487.02	6.6
	1383.36	5.7
	1887.24	4.6
	1157.1	4.6
	1383.59	5.5
	1818.62	5.8
	1759.3	5.5
	1530.73	6.1
	1900.42	5.2
	1363.74	6.1
	1318.79	4.9
	2045.02	4.8
	1470.75	4.7
	1437.14	5.5
	1636.68	4.7
	2306.36	5.9
	2175.84	5.1
	2138.98	5.3
	1953.74	5.9
	2061.22	5.5
	2066.97	5.3
	2072.47	5
	2212.49	4.9
	2276.81	5.3

## Sheet: Panel B
	α	Cell length (mm)
	0.869367	5.4
	0.814033	5.5
	0.890133	4.7
	0.853983	6.8
	0.87208	6
	0.97095	5.9
	0.814517	6.1
	0.946733	6.2
	0.8668	6.3
	0.905783	5.3
	0.890883	6.4
	0.80785	5.5
	0.8241	6.1
	0.84475	6.2
	0.8456	5.1
	0.89525	5.4
	0.8877	6
	0.817983	5.5
	0.8385	7.1
	0.837783	5.4
	0.8625	4.5
	0.8398	4.4
	0.862383	4.7
	0.892067	5.3
	0.8545	5.8
	0.827617	5.5
	0.8334	5.3
	0.842583	5.1
	0.844367	6.6
	0.86645	5.7
	0.8202	4.6
	0.909367	4.6
	0.84478	5.5
	0.899283	5.8
	0.93515	5.5
	0.8684	6.1
	0.881433	5.2
	0.87565	6.1
	0.874417	4.9
	0.876067	4.8
	0.818383	4.7
	0.872083	5.5
	0.828867	4.7
	0.744867	5.9
	0.82355	5.1
	0.810083	5.3
	0.802283	5.9
	0.82572	5.5
	0.850583	5.3
	0.834	5
	0.825983	4.9
	0.886933	5.3

## Sheet: Panel C
	1/tD (s-1)	Cell width (mm)
	1805.29	0.83
	2207.43	0.83
	1996.91	0.9
	2091.65	0.8
	2071	0.84
	1577.76	0.88
	1699.98	0.82
	1788.19	0.83
	1983.01	0.88
	1793.71	0.82
	1987.98	0.87
	1560.16	0.88
	1534.96	0.88
	1962.42	0.78
	1472.92	0.8
	1977.26	0.85
	1723.62	0.77
	1884.23	0.8
	1952.98	0.75
	2379.88	0.76
	2145.23	0.8
	1534.05	0.76
	1530.77	0.88
	1814.97	0.86
	2093.57	0.89
	1764.1	0.77
	2342.71	0.76
	1805.44	0.74
	1487.02	0.81
	1383.36	0.73
	1887.24	0.81
	1157.1	0.74
	1383.59	0.84
	1818.62	0.81
	1759.3	0.89
	1530.73	0.79
	1900.42	0.87
	1363.74	0.79
	1318.79	0.8
	2045.02	0.87
	1470.75	0.76
	1437.14	0.75
	1636.68	0.86
	2306.36	0.82
	2175.84	0.77
	2138.98	0.78
	1953.74	0.84
	2061.22	0.78
	2066.97	0.76
	2072.47	0.83
	2212.49	0.85
	2276.81	0.91

## Sheet: Panel D
	α	Cell width (mm)
	0.869367	0.83
	0.814033	0.83
	0.890133	0.9
	0.853983	0.8
	0.87208	0.84
	0.97095	0.88
	0.814517	0.82
	0.946733	0.83
	0.8668	0.88
	0.905783	0.82
	0.890883	0.87
	0.80785	0.88
	0.8241	0.88
	0.84475	0.78
	0.8456	0.8
	0.89525	0.85
	0.8877	0.77
	0.817983	0.8
	0.8385	0.75
	0.837783	0.76
	0.8625	0.8
	0.8398	0.76
	0.862383	0.88
	0.892067	0.86
	0.8545	0.89
	0.827617	0.77
	0.8334	0.76
	0.842583	0.74
	0.844367	0.81
	0.86645	0.73
	0.8202	0.81
	0.909367	0.74
	0.84478	0.84
	0.899283	0.81
	0.93515	0.89
	0.8684	0.79
	0.881433	0.87
	0.87565	0.79
	0.874417	0.8
	0.876067	0.87
	0.818383	0.76
	0.872083	0.75
	0.828867	0.86
	0.744867	0.82
	0.82355	0.77
	0.810083	0.78
	0.802283	0.84
	0.82572	0.78
	0.850583	0.76
	0.834	0.83
	0.825983	0.85
	0.886933	0.91
