# Supplementary material for: Dependence of diffusion in Escherichia coli cytoplasm on protein size, environmental conditions, and cell growth
Source: eLife. 2022 Dec 5;11:e82654. doi: 10.7554/eLife.82654 (PMC9810338; doi:10.7554/eLife.82654)
Supplement: Figure 1—figure supplement 8—source data 1. — Individual values of α and measurements of cell length from Figure 1—figure supplement 8B. [file elife-82654-fig1-figsupp8-data1.xlsx]

## Sheet: Panel A
		Untreated				Cephalexin
		1/tD (s-1)	Cell length (mm)			1/tD (s-1)	Cell length (mm)
		1849.51	5.3			2312.27	5
		1562.32	4.3			1938.38	5
		1850.76	4			2210.36	4.1
		2122.21	5.6			1734.14	3.8
		1787.98	3.8			2093.7	4.3
						2165.52	4.3

## Sheet: Panel B
	Untreated			Cephalexin
	α	Cell length (mm)		α	Cell length (mm)
	0.82243	5.3		0.89158	5
	0.91263	4.3		0.98508	5
	0.79473	4		0.87056	4.1
	0.90667	5.6		0.8154	3.8
	0.99744	3.8		0.86777	4.3
				0.76643	4.3
