# Supplementary material for: Dependence of diffusion in Escherichia coli cytoplasm on protein size, environmental conditions, and cell growth
Source: eLife. 2022 Dec 5;11:e82654. doi: 10.7554/eLife.82654 (PMC9810338; doi:10.7554/eLife.82654)
Supplement: Figure 1—figure supplement 10—source data 1. — Individual values of α from Figure 1—figure supplement 10B. [file elife-82654-fig1-figsupp10-data1.xlsx]

## Sheet: Panel A
	1/tD (s-1)
	ClpS-wt-sfGFP		ClpS-D35A_D36A_H66A-sfGFP		Map-wt-sfGFP		Map-K211A_K218A_K224A_K226A-sfGFP		Map-K211E_K218E_K224E_K226E-sfGFP
	792.74		1094.2		565.035		936.674		873.732
	934.556		1490.81		518.522		1019.38		974.644
	1145.21		1174.64		572.454		896.047		1046.31
	951.686		1264.7		476.432		1225.7		907.331
	1099.27		1062.93		701.419		1231.89		916.81
	978.877		1568.84		469.283		1499.01		932.749
	903.038		1586.23		528.073		1375.16		1173.26
	832.009		1401.97		737.833		1373.22		1159.36
	972.166		1658.56		465.13		1451.43		1204.85
	906.42		1490.21		375.241		1230.05		1206.28
	1036.35				550.387				1344.73
					467.282				1260.78
					466.82
					445.847
					718.225
					691.978
					572.21
					623.745
					642.027
					738.99

## Sheet: Panel B
	α
	ClpS-wt-sfGFP		ClpS-D35A_D36A_H66A-sfGFP		Map-wt-sfGFP		Map-K211A_K218A_K224A_K226A-sfGFP		Map-K211E_K218E_K224E_K226E-sfGFP
	0.75548		0.94315		0.771817		0.865625		0.86806
	0.7232		0.854017		0.815633		0.801167		0.79844
	0.76532		0.805417		0.768817		0.790533		0.7664
	0.80465		0.819583		0.774067		0.881983		0.818967
	0.722667		0.888967		0.81464		0.8482		0.838475
	0.81688		0.876017		0.81558		0.891783		0.808967
	0.771367		0.82605		0.77388		0.825117		0.832067
	0.72576		0.835167		0.755733		0.88935		0.803617
	0.72068		0.8212		0.8414		0.8437		0.879767
	0.7661		0.86184		0.786167		0.8406		0.883333
	0.694567				0.8602				0.8316
					0.87714				0.875417
					0.8152
					0.7769
					0.857483
					0.820483
					0.835817
					0.82575
					0.789367
					0.787683
