# Supplementary material for: Dependence of diffusion in Escherichia coli cytoplasm on protein size, environmental conditions, and cell growth
Source: eLife. 2022 Dec 5;11:e82654. doi: 10.7554/eLife.82654 (PMC9810338; doi:10.7554/eLife.82654)
Supplement: Figure 1—source data 1. — Individual mean and standard errors of the mean of 1/τD values from Figure 1D. Individual mean and standard errors of the mean of α values from Figure 1E. [file elife-82654-fig1-data1.xlsx]

## Sheet: Panel C
		tD (ms)
		sfGFP	Adk-sfGFP	AcnA-sfGFP
		549.867	968.765	1324.52
		568.408	977.183	1197.84
		653.282	982.592	1449.44
		526.201	824.848	1091.14
		733.276	884.136	1545.95
		758.272	705.079	1245.64
		488.992	841.488	1246.59
		679.924	790.073	1592.18
		695.826	780.077	1908.28
		672.486	761.307	1446.41
		722.878	789.276	1509.12
		529.875	710.642	1757.11
		864.23	668.722	1076.74
		722.759	1006.68	1219.14
		477.653	726.222	1253.01
		566.863	562.634	1161.18
		426.857	635.327	1352.66
		553.881	580.174	1721.21
		466.149	766.912	1785.98
		651.869	879.256
		653.265	809.846
		550.973	865.166
		505.751	927.551
		580.176
		530.721
		512.039
		420.19
		640.96
		651.483
		509.575
		678.921
		633.812
		588.243
		559.224
		504.285
		557.502
		503.024
		553.927
		453.016
		500.774
		478.092
		482.859
		610.994
		433.584
		459.594
		467.512
		511.838
		485.149
		483.799
		482.516
		451.979
		439.212

## Sheet: Panel D
			1/tD (s-1)		α
			Average	SE
		sfGFP	1833.2	41.2039
		YggX-sfGFP	1647.53	48.8737
		ClpS-wt-sfGFP	959.301	30.3172
		ClpS-D35A_D36A_H66A-sfGFP	1379.31	64.682
		FolK-sfGFP	1375.03	45.4688
		Crr-sfGFP	953.204	30.1508
		UbiC-sfGFP	907.301	43.0242
		CoaE-sfGFP	1212.56	70.0042
		Adk-sfGFP	1278.67	43.8174
		Cmk-sfGFP	890.245	39.4139
		KdsB-sfGFP	613.854	23.8546
		Map-wt-sfGFP	566.347	23.8706
		Map-K211A_K218A_K224A_K226A-sfGFP	1223.86	63.6046
		Map-K211E_K218E_K224E_K226E-sfGFP	1083.4	44.2583
		MmuM-sfGFP	471.644	30.1754
		PanE-sfGFP	953.839	22.4427
		SolA-sfGFP	1271.69	50.7652
		Pgk-sfGFP	1034.92	39.2627
		EntC-sfGFP	604.083	42.0287
		AroA-sfGFP	1050.18	73.8646
		ThrC-sfGFP	1118.09	37.3182
		MurF-sfGFP	1028.71	69.3126
		DsdA-sfGFP	1016.21	46.2301
		HemN-sfGFP	814.899	41.1469
		PrpD-sfGFP	570.616	40.4793
		DnaK-wt-sfGFP	440.897	15.9846
		DnaK-V436F-sfGFP	610.782	28.7056
		MalZ-sfGFP	278.021	17.69
		GlcB-sfGFP	774.007	24.8348
		MetE-sfGFP	893.655	38.7441
		LeuS-sfGFP	626.724	25.3511
		AcnA-sfGFP	726.933	27.3823
		MetH-sfGFP	720.226	24.0994

## Sheet: Panel E
		α
		Average	SE
	sfGFP	0.856318	0.00545109
	YggX-sfGFP	0.854359	0.00601864
	ClpS-wt-sfGFP	0.751515	0.0109092
	ClpS-D35A_D36A_H66A-sfGFP	0.853141	0.0124362
	FolK-sfGFP	0.867727	0.00951597
	Crr-sfGFP	0.866512	0.00911912
	UbiC-sfGFP	0.869737	0.00760484
	CoaE-sfGFP	0.869326	0.00966174
	Adk-sfGFP	0.877594	0.00409126
	Cmk-sfGFP	0.86959	0.0104551
	KdsB-sfGFP	0.844031	0.00669701
	Map-wt-sfGFP	0.808188	0.00752011
	Map-K211A_K218A_K224A_K226A-sfGFP	0.847806	0.0105758
	Map-K211E_K218E_K224E_K226E-sfGFP	0.833759	0.0102207
	MmuM-sfGFP	0.730055	0.00790815
	PanE-sfGFP	0.847414	0.00766772
	SolA-sfGFP	0.823002	0.0108031
	Pgk-sfGFP	0.89548	0.0102419
	EntC-sfGFP	0.818009	0.00731277
	AroA-sfGFP	0.862411	0.00772552
	ThrC-sfGFP	0.866829	0.00629229
	MurF-sfGFP	0.848019	0.0157187
	DsdA-sfGFP	0.890256	0.0130014
	HemN-sfGFP	0.858817	0.0086089
	PrpD-sfGFP	0.83649	0.00760346
	DnaK-wt-sfGFP	0.75703	0.00671867
	DnaK-V436F-sfGFP	0.833637	0.00566114
	MalZ-sfGFP	0.76875	0.0117751
	GlcB-sfGFP	0.859546	0.00749451
	MetE-sfGFP	0.868321	0.00717487
	LeuS-sfGFP	0.864634	0.00785356
	AcnA-sfGFP	0.860982	0.00619406
	MetH-sfGFP	0.807934	0.00924275
