# Supplementary material for: Dependence of diffusion in Escherichia coli cytoplasm on protein size, environmental conditions, and cell growth
Source: eLife. 2022 Dec 5;11:e82654. doi: 10.7554/eLife.82654 (PMC9810338; doi:10.7554/eLife.82654)
Supplement: Figure 2—figure supplement 1—source data 1. [file elife-82654-fig2-figsupp1-data1.xlsx]

## Sheet: B
		αunconfined	αfit
			τD = 0.6 ms		τD = 1.2 ms		τD = 2 ms
			Avg	SEM	Avg	SEM	Avg	SEM
		1	0.86469	0.00887	0.90025	0.00874	0.90917	0.00767
		0.95	0.80765	0.00943	0.84563	0.00862	0.84745	0.00938
		0.9	0.7232	0.01094	0.77981	0.00918	0.78994	0.01056
		0.85	0.71024	0.00853	0.76796	0.00793	0.78614	0.00814
		0.8	0.64484	0.01125	0.65958	0.01339	0.72381	0.00712
		0.7	0.54999	0.00825	0.55117	0.00922	0.53557	0.01668
