# Supplementary material for: Dependence of diffusion in Escherichia coli cytoplasm on protein size, environmental conditions, and cell growth
Source: eLife. 2022 Dec 5;11:e82654. doi: 10.7554/eLife.82654 (PMC9810338; doi:10.7554/eLife.82654)
Supplement: Figure 2—figure supplement 2—source data 1. [file elife-82654-fig2-figsupp2-data1.xlsx]

## Sheet: Sheet 1
	1/tD (s-1)
	sfGFP
	CFX	CFX + A22
	1805.29	2040.44
	2207.43	2070.3
	1996.91	2346
	2091.65	2028.76
	2071	1995.4
	1577.76	1796.76
	1699.98	2089.23
	1788.19	2283.15
	1983.01	2505.71
	1793.71	1918.71
	1987.98	2082.97
	1560.16	2157.88
	1534.96	1761.04
	1962.42
	1472.92
	1977.26
	1723.62
	1884.23
	1952.98
	2379.88
	2145.23
	1534.05
	1530.77
	1814.97
	2093.57
	1764.1
	2342.71
	1805.44
	1487.02
	1383.36
	1887.24
	1157.1
	1383.59
	1818.62
	1759.3
	1530.73
	1900.42
	1363.74
	1318.79
	2045.02
	1470.75
	1437.14
	1636.68
	2306.36
	2175.84
	2138.98
	1953.74
	2061.22
	2066.97
	2072.47
	2212.49
	2276.81
