# Supplementary material for: Dependence of diffusion in Escherichia coli cytoplasm on protein size, environmental conditions, and cell growth
Source: eLife. 2022 Dec 5;11:e82654. doi: 10.7554/eLife.82654 (PMC9810338; doi:10.7554/eLife.82654)
Supplement: Figure 2—figure supplement 3—source data 1. — Mean values and standard errors of the mean from Figure 2—figure supplement 3I. Mean values and standard errors of the mean from Figure 2—figure supplement 3J. [file elife-82654-fig2-figsupp3-data1.xlsx]

## Sheet: H
		1/Z0
		Control	CFX	CFX + A22	NaCl	DMSO	Rif	Cam
	Avg	-0.0018	-0.00727	-0.01772	0.02325	-0.00558	-0.00549	-0.00463
	SEM	0.00031784	0.00012166	0.00050092	0.0009822	0.00016517	0.0002538	0.00040798

## Sheet: I
			Estimated volume (μm3)
			Control	CFX	CFX + A22	NaCl	DMSO	Rif	Cam
		Avg	1.3343	2.7414	6.4529	1.1579	1.4217	1.3819	1.4696
		SEM	0.11002	0.06279	0.26595	0.09555	0.11889	0.11491	0.12094

## Sheet: J
			Δρ (kg/m3)
			Control	CFX	CFX + A22	NaCl	DMSO	Rif	Cam
		Avg	-0.54925	-1.0818	-1.1196	8.1872	-1.6015	-1.621	-1.2841
		SEM	0.10716	0.03068	0.05596	0.75898	0.14205	0.1542	0.15486
