# Supplementary material for: Dependence of diffusion in Escherichia coli cytoplasm on protein size, environmental conditions, and cell growth
Source: eLife. 2022 Dec 5;11:e82654. doi: 10.7554/eLife.82654 (PMC9810338; doi:10.7554/eLife.82654)
Supplement: Figure 2—figure supplement 4—source data 1. — Individual values of τD from Figure 2—figure supplement 4B. [file elife-82654-fig2-figsupp4-data1.xlsx]

## Sheet: Panel A
	α
	sfGFP		DnaK-sfGFP		AcnA-sfGFP
	1 A.U.	0.66 A. U.	1 A.U.	0.66 A. U.	1 A.U.	0.66 A. U.
	0.899283	0.93594	0.77275	0.7891	0.872667	0.915867
	0.93515	0.88392	0.7657	0.711633	0.8726	0.900717
	0.8684	0.925467	0.74365	0.7442	0.883483	0.957833
	0.881433	0.9184	0.755533	0.71835	0.861667	0.93208
	0.87565	0.91514	0.780067	0.739083	0.8208	0.9156
	0.874417	0.91795	0.757433	0.75215	0.869817	0.9271
	0.876067	0.98058	0.730183	0.798767	0.861183	0.9138
	0.818383	0.903133	0.785617	0.744067	0.856817	0.889775
	0.872083	0.8932	0.7138	0.756267	0.901133	0.904975
	0.844367	0.955925	0.765567	0.758167	0.83475	0.957067
	0.86645	0.85975			0.912883
	0.8202	0.946717			0.846367
	0.909367				0.833783
	0.84478				0.826867
	0.8545				0.8729
	0.827617				0.84
	0.8334				0.91285
	0.842583				0.836267
	0.8625				0.841817
	0.8398
	0.862383
	0.892067
	0.89525
	0.8877
	0.817983
	0.8385
	0.837783
	0.80785
	0.8241
	0.84475
	0.8456
	0.97095
	0.814517
	0.946733
	0.8668
	0.905783
	0.890883
	0.869367
	0.814033
	0.890133
	0.853983
	0.87208
	0.828867
	0.744867
	0.82355
	0.810083
	0.802283
	0.82572
	0.850583
	0.834
	0.825983
	0.886933

## Sheet: Panel B
	tD
	sfGFP		DnaK-sfGFP		AcnA-sfGFP
	1 A.U.	0.66 A. U.	1 A.U.	0.66 A. U.	1 A.U.	0.66 A. U.
	549.867	599.937	2037.07	1618.11	1324.52	1287.16
	568.408	573.52	2463.75	2109.91	1197.84	929.183
	653.282	597.408	2300.7	2169.8	1449.44	1190.12
	526.201	535.07	2238.34	2837.27	1091.14	852.662
	733.276	629.465	1853.6	2260.74	1545.95	927.846
	758.272	440.733	2508.59	2296.74	1245.64	1024.4
	488.992	663.294	2547.52	2054.5	1246.59	1467.14
	679.924	414.914	1986.02	1757.57	1592.18	1292.2
	695.826	467.157	2429.53	2222.41	1908.28	1216.47
	672.486	497.659	2597.46	2656.12	1446.41	1097.31
	722.878	476.565			1509.12
	529.875	441.576			1757.11
	864.23				1076.74
	722.759				1219.14
	477.653				1253.01
	566.863				1161.18
	426.857				1352.66
	553.881				1721.21
	466.149				1785.98
	651.869
	653.265
	550.973
	505.751
	580.176
	530.721
	512.039
	420.19
	640.96
	651.483
	509.575
	678.921
	633.812
	588.243
	559.224
	504.285
	557.502
	503.024
	553.927
	453.016
	500.774
	478.092
	482.859
	610.994
	433.584
	459.594
	467.512
	511.838
	485.149
	483.799
	482.516
	451.979
	439.212
