# Supplementary material for: Dependence of diffusion in Escherichia coli cytoplasm on protein size, environmental conditions, and cell growth
Source: eLife. 2022 Dec 5;11:e82654. doi: 10.7554/eLife.82654 (PMC9810338; doi:10.7554/eLife.82654)
Supplement: Figure 2—figure supplement 5—source data 1. [file elife-82654-fig2-figsupp5-data1.xlsx]

## Sheet: Sheet1
		sfGFP				Adk-sfGFP				DnaKwt-sfGFP				DnaKV436F-sfGFP				AcnA-sfGFP
		10^1	10^-2	10^-3		10^1	10^-2	3*10^-3		10^1	10^-2	3*10^-3		10^1	10^-2	3*10^-3		10^1	10^-2	3*10^-3
		0.86937	0.8887	0.99227		0.865517	0.902067	0.962467		0.77275	0.81757	0.86777		0.85958	0.8629	0.91263		0.91285	0.94105	0.98213
		0.81403	0.8282	1.00913		0.873917	0.917517	0.9721		0.7657	0.78977	0.85782		0.82143	0.85153	0.93463		0.83627	0.8676	0.91487
		0.89013	0.89667	1.01398		0.881217	0.8921	0.955967		0.74365	0.76817	0.8461		0.80877	0.85718	0.91395		0.84182	0.85365	0.88673
		0.85226	0.9647	1.01252		0.871417	0.8884	0.957917		0.75553	0.77172	0.79622		0.84473	0.86727	0.91877		0.83378	0.86448	0.91162
		0.88633	0.89205	1.0577		0.8626	0.9089	0.959883		0.78007	0.81598	0.89845		0.83107	0.86048	0.89787		0.82687	0.87932	0.95448
		0.97095	0.96972	1.00908		0.870867	0.8907	0.928333		0.75743	0.78522	0.82853		0.83835	0.86312	0.97592		0.8729	0.89825	0.98198
		0.81452	0.84222	0.9556		0.874833	0.894167	0.9743		0.73018	0.76773	0.86537		0.79933	0.84183	0.92058		0.84	0.86725	0.91123
		0.94673	0.95912	1.0694		0.8931	0.905483	0.962317		0.78562	0.83607	0.93015		0.83932	0.84622	0.93905		0.90113	0.90607	0.96218
		0.8668	0.89037	1.00102		0.893917	0.911567	0.93865		0.7138	0.77378	0.81445		0.8418	0.93125	0.98938		0.83475	0.90507	0.98107
		0.90578	0.92818	0.95275		0.882267	0.9146	0.988517		0.76557	0.786	0.89975		0.85198	0.88315	0.90822		0.91288	0.93942	1.01208
		0.89088	0.89217	0.98502		0.89095	0.923517	0.9695										0.84637	0.87492	0.9074
		0.82572	0.8523	0.99726		0.88285	0.912367	0.993267										0.8208	0.85225	0.90105
		0.85058	0.8792	1.09798		0.909833	0.915483	0.964067										0.86982	0.87355	0.92445
		0.834	0.83358	0.97307		0.892783	0.89865	0.926167										0.86118	0.89835	0.9722
		0.82598	0.85725	0.9886		0.8788	0.900533	0.957933										0.85682	0.91042	0.97047
		0.88693	0.91785	1.05587		0.852317	0.876933	0.908717										0.87267	0.901	0.94857
		0.82887	0.8652	0.99112		0.89685	0.89245	0.909967										0.8726	0.92042	0.93345
		0.74487	0.7859	1.0192		0.824817	0.83935	0.874433										0.88348	0.8965	0.94807
		0.82355	0.83777	0.96775		0.869167	0.87215	0.920217										0.86167	0.89077	0.95203
		0.81008	0.80627	0.99097		0.897433	0.92545	0.952083
		0.80228	0.79933	1.00912		0.909733	0.92765	0.956233
		0.80785	0.81682	0.94152		0.858117	0.898583	0.964183
		0.8241	0.83713	1.01885		0.851367	0.895283	0.96735
		0.84475	0.87635	1.05017
		0.8456	0.84865	1.06083
		0.89525	0.89787	1.09375
		0.8877	0.8804	0.95355
		0.81798	0.82875	1.00313
		0.8385	0.84005	0.98053
		0.83778	0.83247	1.00878
		0.8625	0.87397	0.96067
		0.8398	0.85822	1.05415
		0.86238	0.88775	1.02282
		0.89207	0.90715	1.0052
	Avg	0.85285	0.869774	1.00892		0.877594	0.90017	0.950633		0.75703	0.791201	0.860461		0.833636	0.866493	0.9311		0.860982	0.891597	0.945056
	SEM	0.00737918	0.00765405	0.0067143		0.00409126	0.00401122	0.0056997		0.00671911	0.00717756	0.0124087		0.00566096	0.00765627	0.00894804		0.00619382	0.00580342	0.00759993
