# Supplementary material for: Dependence of diffusion in Escherichia coli cytoplasm on protein size, environmental conditions, and cell growth
Source: eLife. 2022 Dec 5;11:e82654. doi: 10.7554/eLife.82654 (PMC9810338; doi:10.7554/eLife.82654)
Supplement: Figure 2—figure supplement 7—source data 1. — Average and error from simulation in Figure 2—figure supplement 7B. [file elife-82654-fig2-figsupp7-data1.xlsx]

## Sheet: Panel A
	Diffusion coefficient (mm2/s)	D Anom. diff. model/D
		d = 0.7 mm		d = 0.8 mm		d = 0.9 mm		d = 1.0 mm
		Average	Error	Average	Error	Average	Error	Average	Error
	2	0.98055	0.02043	1.0839	0.00969	1.0687	0.0078	1.0844	0.00892
	4	1.0253	0.01777	1.072	0.01493	1.0666	0.01624	1.0943	0.00924
	8	1.0641	0.02066	1.0963	0.01838	1.0845	0.01255	1.0836	0.01064
	16	1.2222	0.03302	1.16	0.02439	1.1415	0.02018	1.1302	0.01571

## Sheet: Panel B
	Diffusion coefficient (mm2/s)	D OU model/D
		d = 0.7 mm		d = 0.8 mm		d = 0.9 mm		d = 1.0 mm
		Average	Error	Average	Error	Average	Error	Average	Error
	2	0.9635	0.01971	1.0846	0.012	1.056	0.00838	1.0415	0.00896
	4	0.97786	0.01261	1.0282	0.01077	1.0272	0.01038	1.0674	0.00585
	8	0.93999	0.01587	1.0159	0.01211	1.0246	0.00953	1.0355	0.00602
	16	0.92394	0.01554	0.99467	0.01013	1.0117	0.00923	1.0633	0.00728
