# Supplementary material for: Dependence of diffusion in Escherichia coli cytoplasm on protein size, environmental conditions, and cell growth
Source: eLife. 2022 Dec 5;11:e82654. doi: 10.7554/eLife.82654 (PMC9810338; doi:10.7554/eLife.82654)
Supplement: Figure 2—source data 1. — Individual measurements of cell diameters from Figure 2C. Individual measurements of α from Figure 2D. Individual mean and standard error of the mean of diffusion coefficient values from Figure 2E and F. [file elife-82654-fig2-data1.xlsx]

## Sheet: Panel B
	Cell diameter (mm)	α
		16 mm2/s		8 mm2/s		4 mm2/s		2 mm2/s
		Average	Error	Average	Error	Average	Error	Average	Error
	0.7	0.76212	0.0091	0.80478	0.00936	0.84874	0.01063	0.81628	0.01335
	0.8	0.85163	0.00955	0.87954	0.00992	0.89496	0.00951	0.96962	0.00774
	0.9	0.88836	0.00898	0.92211	0.00766	0.92982	0.01128	0.99677	0.00665
	1	0.94793	0.00836	0.9506	0.00698	0.97677	0.00692	0.97263	0.00716

## Sheet: Panel C
	Cell diameter (mm)
	CFX	CFX + A22
	0.83	1.28
	0.83	1.27
	0.9	1.22
	0.8	1.21
	0.84	1.29
	0.88	1.28
	0.82	1.14
	0.83	1.34
	0.88	1.3
	0.82	1.19
	0.87	1.32
	0.88	1.12
	0.88	1.24
	0.78
	0.8
	0.85
	0.77
	0.8
	0.75
	0.76
	0.8
	0.76
	0.88
	0.86
	0.89
	0.77
	0.76
	0.74
	0.81
	0.73
	0.81
	0.74
	0.84
	0.81
	0.89
	0.79
	0.87
	0.79
	0.8
	0.87
	0.76
	0.75
	0.86
	0.82
	0.77
	0.78
	0.84
	0.78
	0.76
	0.83
	0.85
	0.91

## Sheet: Panel D
	α
	CFX	CFX + A22
	0.869367	0.970533
	0.814033	0.911733
	0.890133	0.9239
	0.853983	0.9403
	0.87208	0.9051
	0.97095	0.942683
	0.814517	0.928367
	0.946733	0.984917
	0.8668	0.894967
	0.905783	0.909033
	0.890883	1.02638
	0.80785	0.9567
	0.8241	1.0035
	0.84475
	0.8456
	0.89525
	0.8877
	0.817983
	0.8385
	0.837783
	0.8625
	0.8398
	0.862383
	0.892067
	0.8545
	0.827617
	0.8334
	0.842583
	0.844367
	0.86645
	0.8202
	0.909367
	0.84478
	0.899283
	0.93515
	0.8684
	0.881433
	0.87565
	0.874417
	0.876067
	0.818383
	0.872083
	0.828867
	0.744867
	0.82355
	0.810083
	0.802283
	0.82572
	0.850583
	0.834
	0.825983
	0.886933

## Sheet: Panel E and F
			Diffusion coefficient (mm2/s)
	Construct	Molecular mass (kDa)	Average	SE
	sfGFP	26.9	14.6919	0.322322
	YggX-sfGFP	37.9	12.9459	0.36156
	ClpS-D35A_D36A_H66A-sfGFP	39.2	10.8708	0.39643
	FolK-sfGFP	45.051	11.641	0.408882
	CoaE-sfGFP	49.594	9.76616	0.567899
	Adk-sfGFP	50.558	10.554	0.376245
	Map-K211A_K218A_K224A_K226A-sfGFP	56.303	10.2488	0.524513
	Map-K211E_K218E_K224E_K226E-sfGFP	56.303	8.65045	0.373365
	PanE-sfGFP	60.843	7.81845	0.203219
	SolA-sfGFP	67.874	9.89063	0.502832
	Pgk-sfGFP	68.09	8.60835	0.341637
	AroA-sfGFP	73.068	8.66917	0.669104
	ThrC-sfGFP	74.086	9.07895	0.299017
	MurF-sfGFP	74.419	8.30466	0.655787
	DsdA-sfGFP	74.873	8.37786	0.385515
	HemN-sfGFP	79.701	6.74209	0.352291
	DnaK-V436F-sfGFP	95.985	5.07923	0.239822
	GlcB-sfGFP	107.461	6.36254	0.197227
	MetE-sfGFP	111.672	7.35667	0.335099
	LeuS-sfGFP	124.206	5.11534	0.19397
	AcnA-sfGFP	124.672	6.08488	0.228627
	MetH-sfGFP	162.962	5.84996	0.144443
