# Supplementary material for: Dependence of diffusion in Escherichia coli cytoplasm on protein size, environmental conditions, and cell growth
Source: eLife. 2022 Dec 5;11:e82654. doi: 10.7554/eLife.82654 (PMC9810338; doi:10.7554/eLife.82654)
Supplement: Figure 3—source data 1. [file elife-82654-fig3-data1.xlsx]

## Sheet: Panel C
		DFCS (mm2/s)		DFRAP(mm2/s)
	Construct	Average	SE	Average	SE
	sfGFP	14.6919	0.322322	11.2792	1.27086
	YggX-sfGFP	12.9459	0.36156	9.4487	1.64911
	Adk-sfGFP	10.554	0.376245	9.75563	1.47093
	PanE-sfGFP	7.81845	0.203219	5.22155	0.606703
	DsdA-sfGFP	8.37786	0.385515	7.8462	0.666327
	GlcB-sfGFP	6.36254	0.197227	6.6968	1.06302
	AcnA-sfGFP	6.08488	0.228627	4.25	0.352086
	MetH-sfGFP	5.84996	0.144443	4.03747	0.476788
