# Supplementary material for: Dependence of diffusion in Escherichia coli cytoplasm on protein size, environmental conditions, and cell growth
Source: eLife. 2022 Dec 5;11:e82654. doi: 10.7554/eLife.82654 (PMC9810338; doi:10.7554/eLife.82654)
Supplement: Figure 4—figure supplement 1—source data 1. — Individual values of α from Figure 4—figure supplement 1B. [file elife-82654-fig4-figsupp1-data1.xlsx]

## Sheet: Panel A
	1/tD (s-1)
	Adk-sfGFP						Pgk-sfGFP				AcnA-sfGFP
	E. coli	Y. enterocolitica	V. cholerae	C. crescentus	M. xanthus	B. subtilis	E. coli	V. cholerae	C. crescentus	M. xanthus	E. coli	Y. enterocolitica	V. cholerae	M. xanthus	B. subtilis
	1032.24	1040.92	1271.46	1121.66	1281.39	1043.44	1024.48	918.125	1115.47	935.791	754.993	859.123	1042.76	423.887	674.925
	1023.35	1410.76	1341.22	1257.89	1240.04	1137.75	1038.59	1013.18	1079.01	851.074	834.837	831.36	920.073	534.463	769.958
	1017.72	1116.39	1387.97	1009.4	1522.77	1297.94	787.516	925.356	977.127	803.164	689.924	684.259	840.214	449.928	670.913
	1212.34	1047.87	1804.39	1420.53	1190.48	1449.74	1196.86	1046.84	1121.33	938.932	916.476	960.836	775.835	356.585	872.295
	1131.05	1165.3	1361.69	1533.98	1293.22	1477.25	745.314	932.874	1192.8	750.795	646.849	805.38	710.048	441.091	813.958
	1418.28		1240.34		1217.65	1428.57	1333.22	1040.52		854.048	802.801		704.908	243.143	820.695
	1188.37		1467.41		985.086	1212.9	1116.22	1154.17		1157.76	802.186		714.804	360.358	863.078
	1265.71		1424.5		1042.94	1392.14	1213.85	1246.81		992.3	628.07		699.022	399.079	982.786
	1281.93		1313.81		1190.52	1634.19	947.178	1236.17		1102.73	524.031		863.964	379.113	773.08
	1313.53		1563.54		1132.57	1704.98	1019.71	1013.26		1213.84	691.368		821.955	332.476	801.255
	1266.98				1096.2		1156.52			1106.71	662.639
	1407.18						1127.29				569.115
	1495.39						811.664				928.733
	993.364						1069.82				820.253
	1376.99						920.604				798.079
	1777.35						1049.93				861.195
	1573.99										739.282
	1723.62										580.987
	1303.93										559.917
	1137.32
	1234.8
	1155.85
	1078.11

## Sheet: Panel B
	α
	Adk-sfGFP						Pgk-sfGFP				AcnA-sfGFP
	E. coli	Y. enterocolitica	V. cholerae	C. crescentus	M. xanthus	B. subtilis	E. coli	V. cholerae	C. crescentus	M. xanthus	E. coli	Y. enterocolitica	V. cholerae	M. xanthus	B. subtilis
	0.869167	0.82148	0.873817	0.858367	0.860267	0.8418	0.92845	0.906	0.821117	0.845575	0.872667	0.821633	0.822733	0.84155	0.833033
	0.897433	0.84104	0.88135	0.844467	0.88048	0.77186	1.0116	0.847967	0.88405	0.86138	0.8726	0.861917	0.86415	0.788983	0.785567
	0.909733	0.805983	0.876667	0.88265	0.82945	0.808675	0.89835	0.8999	0.84486	0.81502	0.883483	0.81648	0.79665	0.8159	0.785433
	0.858117	0.82896	0.8165	0.85395	0.8049	0.6984	0.90175	0.878733	0.848975	0.840683	0.861667	0.809167	0.857167	0.8622	0.813483
	0.851367	0.83152	0.8725	0.8367	0.7896	0.830825	0.92215	0.81546	0.852083	0.859917	0.8208	0.84605	0.88892	0.84425	0.79595
	0.892783		0.84812		0.884167	0.821667	0.881467	0.895817		0.870917	0.869817		0.84075	0.752567	0.815775
	0.8788		0.8677		0.911683	0.829083	0.889883	0.8631		0.81196	0.861183		0.85855	0.86816	0.8157
	0.852317		0.85388		0.870967	0.8367	0.91145	0.8711		0.871117	0.856817		0.84672	0.85456	0.84488
	0.89685		0.864633		0.84066	0.8862	0.8989	0.900325		0.901867	0.901133		0.8423	0.8634	0.84984
	0.824817		0.90388		0.828483	0.8182	0.82535	0.840083		0.887367	0.83475		0.84565	0.86284	0.838033
	0.893917				0.887967		0.881117			0.863383	0.912883
	0.882267						0.8827				0.846367
	0.89095						0.856267				0.833783
	0.88285						0.87135				0.826867
	0.909833						0.842633				0.8729
	0.870867						0.924267				0.84
	0.874833										0.91285
	0.8931										0.836267
	0.865517										0.841817
	0.873917
	0.881217
	0.871417
	0.8626
