# Supplementary material for: Dependence of diffusion in Escherichia coli cytoplasm on protein size, environmental conditions, and cell growth
Source: eLife. 2022 Dec 5;11:e82654. doi: 10.7554/eLife.82654 (PMC9810338; doi:10.7554/eLife.82654)
Supplement: Figure 4—source data 1. — Individual mean and standard error of the mean of α values from Figure 4B. [file elife-82654-fig4-data1.xlsx]

## Sheet: Panel A
				1/tD (s-1)
			Molecular mass (kDa)	Average	SEM
	Adk-sfGFP	E.c.	50.558	1278.67	43.8174
		Y.e.	50.655	1156.25	60.4966
		V.c.	50.177	1417.63	49.6814
		C.c.	47.241	1268.69	85.4157
		M.x.	50.002	1199.35	41.4375
		B.s.	51.019	1377.89	62.7393
	Pgk-sfGFP	E.c.	68.09	1034.92	39.2627
		V.c.	67.879	1052.73	36.5542
		C.c.	67.587	1097.15	31.4979
		M.x.	69.606	973.376	44.2566
	AcnA-sfGFP	E.c.	124.672	726.933	27.3823
		Y.e.	124.206	828.192	39.899
		V.c.	121.977	809.358	33.7395
		M.x.	125.115	392.012	23.5056
		B.s.	126.234	804.294	27.7472

## Sheet: Panel B
				α
			Molecular mass (kDa)	Average	SEM
	Adk-sfGFP	E.c.	50.558	0.877594	0.00409126
		Y.e.	50.655	0.825797	0.00523956
		V.c.	50.177	0.865905	0.0069348
		C.c.	47.241	0.855227	0.00699298
		M.x.	50.002	0.853511	0.0109117
		B.s.	51.019	0.814341	0.0149179
	Pgk-sfGFP	E.c.	68.09	0.89548	0.0102419
		V.c.	67.879	0.871849	0.00906759
		C.c.	67.587	0.850217	0.0090005
		M.x.	69.606	0.857199	0.00791682
	AcnA-sfGFP	E.c.	124.672	0.860982	0.00619406
		Y.e.	124.206	0.831049	0.00884893
		V.c.	121.977	0.846359	0.0073967
		M.x.	125.115	0.835441	0.0114925
		B.s.	126.234	0.81777	0.00706575
