# Supplementary material for: Dependence of diffusion in Escherichia coli cytoplasm on protein size, environmental conditions, and cell growth
Source: eLife. 2022 Dec 5;11:e82654. doi: 10.7554/eLife.82654 (PMC9810338; doi:10.7554/eLife.82654)
Supplement: Figure 5—figure supplement 1—source data 1. — Individual measurements of cell width from Figure 5—figure supplement 1B. Individual measurements of cell length from Figure 5—figure supplement 1C. Individual measurements of cell width from Figure 5—figure supplement 1D. Individual measurements of cell length from Figure 5—figure supplement 1E. Individual measurements of cell width from Figure 5—figure supplement 1F. Individual measurements of cell length from Figure 5—figure supplement 1G. Individual measurements of cell width from Figure 5—figure supplement 1H. [file elife-82654-fig5-figsupp1-data1.xlsx]

## Sheet: Panel A
	sfGFP
	105 mM		305 mM
	Cell length (mm)	1/tD (s-1)	Cell length (mm)	1/tD (s-1)
	5.4	1818.62	5.5	1441.52
	5.5	1759.3	5.5	1500.31
	4.7	1530.73	5.6	1035.32
	6.8	1900.42	5.7	1547.01
	6	1363.74	5.1	1442.2
	5.9	1318.79	4.9	1660.87
	6.1	2045.02	5.6	1221.46
	6.2	1470.75	5.7	1616.07
	6.3	1437.14	4.6	1217.02
	5.3	1487.02	4.8	1197.3
	6.4	1383.36	4.7	1300.56
	5.5	1887.24
	6.1	1157.1
	6.2	1383.59
	5.1	2093.57
	5.4	1764.1
	6	2342.71
	5.5	1805.44
	7.1	2145.23
	5.4	1534.05
	4.5	1530.77
	4.4	1814.97
	4.7	1977.26
	5.3	1723.62
	5.8	1884.23
	5.5	1952.98
	5.3	2379.88
	5.1	1560.16
	6.6	1534.96
	5.7	1962.42
	4.6	1472.92
	4.6	1577.76
	5.5	1699.98
	5.8	1788.19
	5.5	1983.01
	6.1	1793.71
	5.2	1987.98
	6.1	1805.29
	4.9	2207.43
	4.8	1996.91
	4.7	2091.65
	5.5	2071
	4.7	1636.68
	5.9	2306.36
	5.1	2175.84
	5.3	2138.98
	5.9	1953.74
	5.5	2061.22
	5.3	2066.97
	5	2072.47
	4.9	2212.49
	5.3	2276.81
Avg.	5.5	1833.2	5.24545	1379.97
SD	0.60796	297.126	0.409797	189.456

## Sheet: Panel B
	sfGFP
	105 mM		305 mM
	Cell width (mm)	1/tD (s-1)	Cell width (mm)	1/tD (s-1)
	0.83	1818.62	0.77	1441.52
	0.83	1759.3	0.79	1500.31
	0.9	1530.73	0.74	1035.32
	0.8	1900.42	0.78	1547.01
	0.84	1363.74	0.74	1442.2
	0.88	1318.79	0.83	1660.87
	0.82	2045.02	0.7	1221.46
	0.83	1470.75	0.76	1616.07
	0.88	1437.14	0.74	1217.02
	0.82	1487.02	0.77	1197.3
	0.87	1383.36	0.75	1300.56
	0.88	1887.24
	0.88	1157.1
	0.78	1383.59
	0.8	2093.57
	0.85	1764.1
	0.77	2342.71
	0.8	1805.44
	0.75	2145.23
	0.76	1534.05
	0.8	1530.77
	0.76	1814.97
	0.88	1977.26
	0.86	1723.62
	0.89	1884.23
	0.77	1952.98
	0.76	2379.88
	0.74	1560.16
	0.81	1534.96
	0.73	1962.42
	0.81	1472.92
	0.74	1577.76
	0.84	1699.98
	0.81	1788.19
	0.89	1983.01
	0.79	1793.71
	0.87	1987.98
	0.79	1805.29
	0.8	2207.43
	0.87	1996.91
	0.76	2091.65
	0.75	2071
	0.86	1636.68
	0.82	2306.36
	0.77	2175.84
	0.78	2138.98
	0.84	1953.74
	0.78	2061.22
	0.76	2066.97
	0.83	2072.47
	0.85	2212.49
	0.91	2276.81
Avg.	0.817115	1833.2	0.760909	1379.97
SD	0.0482516	297.126	0.0320382	189.456

## Sheet: Panel C
	sfGFP
	25°C		35°C
	Cell length (mm)	1/tD (s-1)	Cell length (mm)	1/tD (s-1)
	5.4	1818.62	6.3	2276.32
	5.5	1759.3	4.9	2538.75
	4.7	1530.73	6.7	2965.09
	6.8	1900.42	6	2863.31
	6	1363.74	6.3	2217.66
	5.9	1318.79	5.5	2303.4
	6.1	2045.02	5.3	2379.45
	6.2	1470.75	5.5	2220.46
	6.3	1437.14	4.6	2341.66
	5.3	1487.02	5.7	1952.5
	6.4	1383.36	5.6	2331.9
	5.5	1887.24
	6.1	1157.1
	6.2	1383.59
	5.1	2093.57
	5.4	1764.1
	6	2342.71
	5.5	1805.44
	7.1	2145.23
	5.4	1534.05
	4.5	1530.77
	4.4	1814.97
	4.7	1977.26
	5.3	1723.62
	5.8	1884.23
	5.5	1952.98
	5.3	2379.88
	5.1	1560.16
	6.6	1534.96
	5.7	1962.42
	4.6	1472.92
	4.6	1577.76
	5.5	1699.98
	5.8	1788.19
	5.5	1983.01
	6.1	1793.71
	5.2	1987.98
	6.1	1805.29
	4.9	2207.43
	4.8	1996.91
	4.7	2091.65
	5.5	2071
	4.7	1636.68
	5.9	2306.36
	5.1	2175.84
	5.3	2138.98
	5.9	1953.74
	5.5	2061.22
	5.3	2066.97
	5	2072.47
	4.9	2212.49
	5.3	2276.81
Avg.	5.5	1833.2	5.67273	2399.14
SD	0.60796	297.126	0.595576	278.315

## Sheet: Panel D
	sfGFP
	25°C		35°C
	Cell width (mm)	1/tD (s-1)	Cell width (mm)	1/tD (s-1)
	0.83	1818.62	0.74	2276.32
	0.83	1759.3	0.83	2538.75
	0.9	1530.73	0.85	2965.09
	0.8	1900.42	0.82	2863.31
	0.84	1363.74	0.84	2217.66
	0.88	1318.79	0.79	2303.4
	0.82	2045.02	0.93	2379.45
	0.83	1470.75	0.91	2220.46
	0.88	1437.14	0.89	2341.66
	0.82	1487.02	0.83	1952.5
	0.87	1383.36	0.9	2331.9
	0.88	1887.24
	0.88	1157.1
	0.78	1383.59
	0.8	2093.57
	0.85	1764.1
	0.77	2342.71
	0.8	1805.44
	0.75	2145.23
	0.76	1534.05
	0.8	1530.77
	0.76	1814.97
	0.88	1977.26
	0.86	1723.62
	0.89	1884.23
	0.77	1952.98
	0.76	2379.88
	0.74	1560.16
	0.81	1534.96
	0.73	1962.42
	0.81	1472.92
	0.74	1577.76
	0.84	1699.98
	0.81	1788.19
	0.89	1983.01
	0.79	1793.71
	0.87	1987.98
	0.79	1805.29
	0.8	2207.43
	0.87	1996.91
	0.76	2091.65
	0.75	2071
	0.86	1636.68
	0.82	2306.36
	0.77	2175.84
	0.78	2138.98
	0.84	1953.74
	0.78	2061.22
	0.76	2066.97
	0.83	2072.47
	0.85	2212.49
	0.91	2276.81
Avg.	0.817115	1833.2	0.848182	2399.14
SD	0.0482516	297.126	0.053567	278.315

## Sheet: Panel E
	sfGFP
	Untreated		Chloramphenicol		DMSO		Rifampicin
	Cell length (mm)	1/tD (s-1)	Cell length (mm)	1/tD (s-1)	Cell length (mm)	1/tD (s-1)	Cell length (mm)	1/tD (s-1)
	5.4	1818.62	4.8	1669.42	5.3	1906.41	6.2	1995.4
	5.5	1759.3	5	1391.67	5.1	2551.87	5.7	3020.24
	4.7	1530.73	4.7	2225.15	4.8	2365.75	4.8	2878.21
	6.8	1900.42	5.7	1554.45	5.4	2070.75	5.7	2434.57
	6	1363.74	5.8	1502.17	4.8	2183.93	5.4	3477.83
	5.9	1318.79	5.4	2868.83	5.5	2235.19	5.8	2283.63
	6.1	2045.02	5.1	1100.89	4.9	2408.8	5.4	2475.96
	6.2	1470.75	5.3	1799.81	5.1	2561.12	4.7	1974.98
	6.3	1437.14	4.8	946.223	4.7	1911.54	5.9	2224.49
	5.3	1487.02	5.8	1718.4	5.6	1644.85	5.4	1910.77
	6.4	1383.36			8.1	2071.72	5.8	2440.11
	5.5	1887.24			5.4	2144.96	5.5	2672.96
	6.1	1157.1			7.3	2415.98	5.4	2545.67
	6.2	1383.59			6.8	1637.51	5.8	2817.82
	5.1	2093.57			5.1	2259.75	6.3	2592.61
	5.4	1764.1
	6	2342.71
	5.5	1805.44
	7.1	2145.23
	5.4	1534.05
	4.5	1530.77
	4.4	1814.97
	4.7	1977.26
	5.3	1723.62
	5.8	1884.23
	5.5	1952.98
	5.3	2379.88
	5.1	1560.16
	6.6	1534.96
	5.7	1962.42
	4.6	1472.92
	4.6	1577.76
	5.5	1699.98
	5.8	1788.19
	5.5	1983.01
	6.1	1793.71
	5.2	1987.98
	6.1	1805.29
	4.9	2207.43
	4.8	1996.91
	4.7	2091.65
	5.5	2071
	4.7	1636.68
	5.9	2306.36
	5.1	2175.84
	5.3	2138.98
	5.9	1953.74
	5.5	2061.22
	5.3	2066.97
	5	2072.47
	4.9	2212.49
	5.3	2276.81
Avg.	5.5	1833.2	5.24	1677.7	5.59333	2158.01	5.58667	2516.35
SD	0.60796	297.126	0.402989	522.562	0.969169	280.563	0.424055	409.556

## Sheet: Panel F
	sfGFP
	Untreated		Chloramphenicol		DMSO		Rifampicin
	Cell width (mm)	1/tD (s-1)	Cell width (mm)	1/tD (s-1)	Cell width (mm)	1/tD (s-1)	Cell width (mm)	1/tD (s-1)
	0.83	1818.62	0.81	1669.42	0.81	1906.41	0.82	1995.4
	0.83	1759.3	0.88	1391.67	0.87	2551.87	0.83	3020.24
	0.9	1530.73	0.86	2225.15	0.82	2365.75	0.91	2878.21
	0.8	1900.42	0.84	1554.45	0.88	2070.75	0.74	2434.57
	0.84	1363.74	0.88	1502.17	0.81	2183.93	0.82	3477.83
	0.88	1318.79	0.92	2868.83	0.93	2235.19	0.82	2283.63
	0.82	2045.02	0.84	1100.89	0.9	2408.8	0.84	2475.96
	0.83	1470.75	0.88	1799.81	0.78	2561.12	0.87	1974.98
	0.88	1437.14	0.87	946.223	0.81	1911.54	0.89	2224.49
	0.82	1487.02	0.85	1718.4	0.86	1644.85	0.79	1910.77
	0.87	1383.36			0.92	2071.72	0.87	2440.11
	0.88	1887.24			0.8	2144.96	0.86	2672.96
	0.88	1157.1			0.83	2415.98	0.84	2545.67
	0.78	1383.59			0.86	1637.51	0.79	2817.82
	0.8	2093.57			0.84	2259.75	0.84	2592.61
	0.85	1764.1
	0.77	2342.71
	0.8	1805.44
	0.75	2145.23
	0.76	1534.05
	0.8	1530.77
	0.76	1814.97
	0.88	1977.26
	0.86	1723.62
	0.89	1884.23
	0.77	1952.98
	0.76	2379.88
	0.74	1560.16
	0.81	1534.96
	0.73	1962.42
	0.81	1472.92
	0.74	1577.76
	0.84	1699.98
	0.81	1788.19
	0.89	1983.01
	0.79	1793.71
	0.87	1987.98
	0.79	1805.29
	0.8	2207.43
	0.87	1996.91
	0.76	2091.65
	0.75	2071
	0.86	1636.68
	0.82	2306.36
	0.77	2175.84
	0.78	2138.98
	0.84	1953.74
	0.78	2061.22
	0.76	2066.97
	0.83	2072.47
	0.85	2212.49
	0.91	2276.81
Avg.	0.817115	1833.2	0.863	1677.7	0.848	2158.01	0.835333	2516.35
SD	0.0482516	297.126	0.0286531	522.562	0.0438482	280.563	0.0412903	409.556

## Sheet: Panel G
	sfGFP
	M9 salts		M9 salts, glu+CA
	Cell length (mm)	1/tD (s-1)	Cell length (mm)	1/tD (s-1)
	5.8	1759.16	6.4	3215.52
	4.8	2478.31	7	3228.1
	5.6	1812.22	4.9	2375.55
	5.9	1913.5	4.9	1937.52
	5.9	1553.53	5.1	2211.54
	5.1	1985.72	4	3909.3
	4.6	1742.85	4.4	4045.38
	3.6	1436.07	6.8	2870.25
	5.1	1430.79	5.7	2656.14
	4.5	1748.67	4.9	3817.69
			3.6	3561.86
			4.6	1960.57
			4.6	2294.14
			4.5	2760.58
			4.6	2678.34
Avg.	5.09	1786.08	5.06667	2901.5
SD	0.704911	290.305	0.95615	676.849

## Sheet: Panel H
	sfGFP
	M9 salts		M9 salts, glu+CA
	Cell width (mm)	1/tD (s-1)	Cell width (mm)	1/tD (s-1)
	0.8	1759.16	0.85	3215.52
	0.78	2478.31	0.89	3228.1
	0.77	1812.22	0.79	2375.55
	0.83	1913.5	0.9	1937.52
	0.7	1553.53	0.88	2211.54
	0.88	1985.72	0.87	3909.3
	0.91	1742.85	0.95	4045.38
	0.84	1436.07	0.86	2870.25
	0.81	1430.79	0.88	2656.14
	0.86	1748.67	0.84	3817.69
			0.88	3561.86
			0.9	1960.57
			0.83	2294.14
			0.92	2760.58
			0.92	2678.34
Avg.	0.818	1786.08	0.877333	2901.5
SD	0.0572364	290.305	0.0387241	676.849
