# Supplementary material for: Dependence of diffusion in Escherichia coli cytoplasm on protein size, environmental conditions, and cell growth
Source: eLife. 2022 Dec 5;11:e82654. doi: 10.7554/eLife.82654 (PMC9810338; doi:10.7554/eLife.82654)
Supplement: Figure 5—figure supplement 2—source data 1. — Individual values of 1/τD from Figure 5—figure supplement 2B. Individual values of 1/τD from Figure 5—figure supplement 2C. Individual values of 1/τD from Figure 5—figure supplement 2D. [file elife-82654-fig5-figsupp2-data1.xlsx]

## Sheet: Panel A
	1/tD (s-1)
	sfGFP		Adk-sfGFP		AroA-sfGFP		AcnA-sfGFP
	105 mM	305 mM	105 mM	305 mM	105 mM	305 mM	105 mM	305 mM
	1818.62	1441.52	1032.24	898.247	791.517	948.198	754.993	678.276
	1759.3	1500.31	1023.35	1168.1	840.639	1014.87	834.837	498.664
	1530.73	1035.32	1017.72	1219.42	807.789	759.906	689.924	535.449
	1900.42	1547.01	1212.34	1022.42	873.464	949.183	916.476	604.047
	1363.74	1442.2	1131.05	1008.09	996.287	760.512	646.849	471.233
	1318.79	1660.87	1418.28	934.338	1235.95	875.776	802.801	599.643
	2045.02	1221.46	1188.37	1089.15	1330.84	533.478	802.186
	1470.75	1616.07	1265.71	1042.23	1365.86	800.248	628.07
	1437.14	1217.02	1281.93	956.529	1209.23	807.505	524.031
	1487.02	1197.3	1313.53	833.975		857.915	691.368
	1383.36	1300.56	1266.98	909.034		768.011	662.639
	1887.24		1407.18			1026.91	569.115
	1157.1		1495.39				928.733
	1383.59		993.364				820.253
	2093.57		1376.99				798.079
	1764.1		1777.35				861.195
	2342.71		1573.99				739.282
	1805.44		1723.62				580.987
	2145.23		1303.93				559.917
	1534.05		1137.32
	1530.77		1234.8
	1814.97		1155.85
	1977.26		1078.11
	1723.62
	1884.23
	1952.98
	2379.88
	1560.16
	1534.96
	1962.42
	1472.92
	1577.76
	1699.98
	1788.19
	1983.01
	1793.71
	1987.98
	1805.29
	2207.43
	1996.91
	2091.65
	2071
	1636.68
	2306.36
	2175.84
	2138.98
	1953.74
	2061.22
	2066.97
	2072.47
	2212.49
	2276.81

## Sheet: Panel B
	1/tD (s-1)
	sfGFP		Adk-sfGFP		AcnA-sfGFP
	25°C	35°C	25°C	35°C	25°C	35°C
	1818.62	2276.32	1032.24	1842.29	754.993	991.625
	1759.3	2538.75	1023.35	1505.94	834.837	977.893
	1530.73	2965.09	1017.72	1779.49	689.924	747.024
	1900.42	2863.31	1212.34	1622.57	916.476	911.623
	1363.74	2217.66	1131.05	1334.61	646.849	911.06
	1318.79	2303.4	1418.28	1628.71	802.801	958.86
	2045.02	2379.45	1188.37	1756.71	802.186	1012.07
	1470.75	2220.46	1265.71	1486.12	628.07	958.622
	1437.14	2341.66	1281.93	1745.72	524.031	798.341
	1487.02	1952.5	1313.53	1675.75	691.368	1134.04
	1383.36	2331.9	1266.98	1631.71	662.639	995.446
	1887.24		1407.18	1463.88	569.115	1625.53
	1157.1		1495.39	1604.05	928.733	583.484
	1383.59		993.364	1641.95	820.253	1008.7
	2093.57		1376.99	1483.14	798.079	1170.63
	1764.1		1777.35	1771.36	861.195	773.865
	2342.71		1573.99	1453.02	739.282	1397.54
	1805.44		1723.62	1388.21	580.987	642.312
	2145.23		1303.93	1659	559.917
	1534.05		1137.32	1213.14
	1530.77		1234.8	1771.12
	1814.97		1155.85
	1977.26		1078.11
	1723.62
	1884.23
	1952.98
	2379.88
	1560.16
	1534.96
	1962.42
	1472.92
	1577.76
	1699.98
	1788.19
	1983.01
	1793.71
	1987.98
	1805.29
	2207.43
	1996.91
	2091.65
	2071
	1636.68
	2306.36
	2175.84
	2138.98
	1953.74
	2061.22
	2066.97
	2072.47
	2212.49
	2276.81

## Sheet: Panel C
	1/tD (s-1)
	sfGFP				Adk-sfGFP				Pgk-sfGFP				AcnA-sfGFP
	Untreated	Chloramphenicol	DMSO	Rifampicin	Untreated	Chloramphenicol	DMSO	Rifampicin	Untreated	Chloramphenicol	DMSO	Rifampicin	Untreated	Chloramphenicol	DMSO	Rifampicin
	1818.62	1669.42	1906.41	1995.4	1032.24	959.979	1554.25	2156.28	1024.48	784.699	1251.13	1637.28	754.993	550.157	702.338	1199.76
	1759.3	1391.67	2551.87	3020.24	1023.35	1270.86	1350.41	2020.48	1038.59	749.196	996.682	1595.35	834.837	333.75	765.321	1002.3
	1530.73	2225.15	2365.75	2878.21	1017.72	1401.37	1752.67	2130.16	787.516	1023.23	1177.05	1662.4	689.924	696.35	866.462	1211.98
	1900.42	1554.45	2070.75	2434.57	1212.34	1602.42	1605.19	2202.55	1196.86	1147.07	1284.65	1522.77	916.476	405.138	1102.56	1202.95
	1363.74	1502.17	2183.93	3477.83	1131.05	1170.17	1414.11	1932.22	745.314	1034.77	1240	1815.28	646.849	376.323	613.252	1197.94
	1318.79	2868.83	2235.19	2283.63	1418.28	658.268	1334.43	1440.44	1333.22	410.017	1006.99	1484.18	802.801	463.186	976.657	935.908
	2045.02	1100.89	2408.8	2475.96	1188.37	1403.05	1395.04	1692.78	1116.22	840.121	1132.73	1567.29	802.186	285.036	973.326	1184.86
	1470.75	1799.81	2561.12	1974.98	1265.71	898.156	1384.34	1704.54	1213.85	671.769	925.175	2006.63	628.07	401.612	1224.99	1136.76
	1437.14	946.223	1911.54	2224.49	1281.93	908.226	1510.35	1665.42	947.178	1281.38	1181.17	1651.76	524.031	508.452	866.515	992.375
	1487.02	1718.4	1644.85	1910.77	1313.53	620.782	1493.54	1978.01	1019.71	1080.39	1062.77	1385.61	691.368	301.536	936.067	1007.39
	1383.36		2071.72	2440.11	1266.98				1156.52				662.639
	1887.24		2144.96	2672.96	1407.18				1127.29				569.115
	1157.1		2415.98	2545.67	1495.39				811.664				928.733
	1383.59		1637.51	2817.82	993.364				1069.82				820.253
	2093.57		2259.75	2592.61	1376.99				920.604				798.079
	1764.1				1777.35				1049.93				861.195
	2342.71				1573.99								739.282
	1805.44				1723.62								580.987
	2145.23				1303.93								559.917
	1534.05				1137.32
	1530.77				1234.8
	1814.97				1155.85
	1977.26				1078.11
	1723.62
	1884.23
	1952.98
	2379.88
	1560.16
	1534.96
	1962.42
	1472.92
	1577.76
	1699.98
	1788.19
	1983.01
	1793.71
	1987.98
	1805.29
	2207.43
	1996.91
	2091.65
	2071
	1636.68
	2306.36
	2175.84
	2138.98
	1953.74
	2061.22
	2066.97
	2072.47
	2212.49
	2276.81

## Sheet: Panel D
	1/tD (s-1)
	sfGFP		Adk-sfGFP		AroA-sfGFP		AcnA-sfGFP
	M9 salts	M9 salts, glu+CA	M9 salts	M9 salts, glu+CA	M9 salts	M9 salts, glu+CA	M9 salts	M9 salts, glu+CA
	1759.16	3215.52	963.65	1690.29	1159.35	1209.37	616.656	941.942
	2478.31	3228.1	1163.88	1749.95	919.018	1377.7	1040.22	1155.19
	1812.22	2375.55	985.296	1801.79	1145.04	1339.69	455.063	1700.81
	1913.5	1937.52	785.145	2150.31	1050.31	1284.96	493.074	1291.65
	1553.53	2211.54	1177.39	2383.79	896.282	1415.9	690.314	876.731
	1985.72	3909.3	1207.19	1692.33	937.767	1132.4	712.643	939.513
	1742.85	4045.38	1129.83	1699.79	852.477	1338.26	750.94	877.266
	1436.07	2870.25	1294.96	1358.13	974.303	1257.45	656.57	1501.13
	1430.79	2656.14	976.306	1270.73	836.783	1515.67	902.75	856.17
	1748.67	3817.69	1417.01	1642.46	843.671	1411.55	919.984	1122.44
		3561.86	1338.17	1378.34	866.327	1478.35
		1960.57		1466.24
		2294.14
		2760.58
		2678.34
