# Supplementary material for: Dependence of diffusion in Escherichia coli cytoplasm on protein size, environmental conditions, and cell growth
Source: eLife. 2022 Dec 5;11:e82654. doi: 10.7554/eLife.82654 (PMC9810338; doi:10.7554/eLife.82654)
Supplement: Figure 5—figure supplement 3—source data 1. — Individual values of α from Figure 5—figure supplement 3B. Individual values of α from Figure 5—figure supplement 3C. Individual values of α from Figure 5—figure supplement 3D. [file elife-82654-fig5-figsupp3-data1.xlsx]

## Sheet: Panel A
	α
	sfGFP		Adk-sfGFP		AroA-sfGFP		AcnA-sfGFP
	105 mM	305 mM	105 mM	305 mM	105 mM	305 mM	105 mM	305 mM
	0.899283	0.854683	0.869167	0.929683	0.862433	0.9434	0.872667	0.790525
	0.93515	0.855783	0.897433	0.90942	0.88445	0.88765	0.8726	0.902967
	0.8684	0.84865	0.909733	0.9431	0.854267	0.913067	0.883483	0.997817
	0.881433	0.825933	0.858117	0.920167	0.821867	0.875	0.861667	0.851717
	0.87565	0.849583	0.851367	1.02163	0.865833	0.958533	0.8208	0.90554
	0.874417	0.892183	0.892783	0.8518	0.907433	0.873117	0.869817	0.909833
	0.876067	0.811283	0.8788	0.8186	0.850117	0.8389	0.861183
	0.818383	0.782767	0.852317	0.8285	0.87185	0.930433	0.856817
	0.872083	0.855983	0.89685	0.784225	0.84345	0.853183	0.901133
	0.844367	0.8162	0.824817	0.89015		0.85568	0.83475
	0.86645	0.825767	0.893917	0.8975		0.85638	0.912883
	0.8202		0.882267			0.87635	0.846367
	0.909367		0.89095				0.833783
	0.84478		0.88285				0.826867
	0.8545		0.909833				0.8729
	0.827617		0.870867				0.84
	0.8334		0.874833				0.91285
	0.842583		0.8931				0.836267
	0.8625		0.865517				0.841817
	0.8398		0.873917
	0.862383		0.881217
	0.892067		0.871417
	0.89525		0.8626
	0.8877
	0.817983
	0.8385
	0.837783
	0.80785
	0.8241
	0.84475
	0.8456
	0.97095
	0.814517
	0.946733
	0.8668
	0.905783
	0.890883
	0.869367
	0.814033
	0.890133
	0.853983
	0.87208
	0.828867
	0.744867
	0.82355
	0.810083
	0.802283
	0.82572
	0.850583
	0.834
	0.825983
	0.886933

## Sheet: Panel B
	α
	sfGFP		Adk-sfGFP		AcnA-sfGFP
	25°C	35°C	25°C	35°C	25°C	35°C
	0.899283	0.736933	0.869167	0.769	0.872667	0.811133
	0.93515	0.84785	0.897433	0.84515	0.8726	0.804567
	0.8684	0.8788	0.909733	0.7992	0.883483	0.775717
	0.881433	0.80645	0.858117	0.8341	0.861667	0.8979
	0.87565	0.892017	0.851367	0.864883	0.8208	0.844533
	0.874417	0.85905	0.892783	0.84635	0.869817	0.815633
	0.876067	0.84184	0.8788	0.823625	0.861183	0.83935
	0.818383	0.75628	0.852317	0.82392	0.856817	0.8672
	0.872083	0.859967	0.89685	0.78728	0.901133	0.883425
	0.844367	0.7849	0.824817	0.884383	0.83475	0.88685
	0.86645	0.854483	0.893917	0.831217	0.912883	0.7607
	0.8202		0.882267	0.8744	0.846367	0.839333
	0.909367		0.89095	0.845067	0.833783	0.8032
	0.84478		0.88285	0.799267	0.826867	0.898733
	0.8545		0.909833	0.900733	0.8729	0.87348
	0.827617		0.870867	0.83775	0.84	0.8861
	0.8334		0.874833	0.92775	0.91285	0.9121
	0.842583		0.8931	0.908833	0.836267	0.846367
	0.8625		0.865517	0.840417	0.841817
	0.8398		0.873917	0.873767
	0.862383		0.881217	0.880383
	0.892067		0.871417
	0.89525		0.8626
	0.8877
	0.817983
	0.8385
	0.837783
	0.80785
	0.8241
	0.84475
	0.8456
	0.97095
	0.814517
	0.946733
	0.8668
	0.905783
	0.890883
	0.869367
	0.814033
	0.890133
	0.853983
	0.87208
	0.828867
	0.744867
	0.82355
	0.810083
	0.802283
	0.82572
	0.850583
	0.834
	0.825983
	0.886933

## Sheet: Panel C
	α
	sfGFP				Adk-sfGFP				Pgk-sfGFP				AcnA-sfGFP
	Untreated	Chloramphenicol	DMSO	Rifampicin	Untreated	Chloramphenicol	DMSO	Rifampicin	Untreated	Chloramphenicol	DMSO	Rifampicin	Untreated	Chloramphenicol	DMSO	Rifampicin
	0.899283	0.878167	0.862783	0.877267	0.869167	0.903667	0.831517	0.8223	0.92845	0.879317	0.877733	0.862983	0.872667	0.856017	0.846583	0.8415
	0.93515	0.9282	0.838883	0.77625	0.897433	0.895083	0.8102	0.818833	1.0116	0.841617	0.870983	0.904633	0.8726	0.800033	0.8351	0.846217
	0.8684	0.8307	0.767433	0.825017	0.909733	0.870933	0.818167	0.82635	0.89835	0.830583	0.831183	0.869283	0.883483	0.8778	0.867933	0.8763
	0.881433	0.87245	0.885467	0.809933	0.858117	0.848533	0.80975	0.847467	0.90175	0.8736	0.860917	0.865433	0.861667	0.8436	0.85585	0.862783
	0.87565	0.904883	0.749733	0.756117	0.851367	0.8223	0.8067	0.7905	0.92215	0.87405	0.88445	0.88765	0.8208	0.804367	0.822	0.816933
	0.874417	0.793317	0.790167	0.769183	0.892783	0.927	0.817533	0.883367	0.881467	0.87105	0.831575	0.831	0.869817	0.858067	0.872383	0.840667
	0.876067	0.8985	0.807467	0.8396	0.8788	0.883367	0.869967	0.898733	0.889883	0.895925	0.80565	0.78455	0.861183	0.78254	0.870483	0.896283
	0.818383	0.825717	0.799883	0.804983	0.852317	0.84135	0.870683	0.817617	0.91145	0.891883	0.86486	0.875133	0.856817	0.80645	0.860467	0.899933
	0.872083	0.886325	0.808283	0.800517	0.89685	0.882067	0.792067	0.843883	0.8989	0.900333	0.84288	0.81555	0.901133	0.81624	0.950117	0.8515
	0.844367	0.8918	0.7974	0.821917	0.824817	0.8263	0.847717	0.8645	0.82535	0.909983	0.820725	0.87178	0.83475	0.811433	0.91585	0.845067
	0.86645		0.819567	0.774	0.893917				0.881117				0.912883
	0.8202		0.7868	0.799817	0.882267				0.8827				0.846367
	0.909367		0.85265	0.8155	0.89095				0.856267				0.833783
	0.84478		0.831333	0.819467	0.88285				0.87135				0.826867
	0.8545		0.807417	0.79025	0.909833				0.842633				0.8729
	0.827617				0.870867				0.924267				0.84
	0.8334				0.874833								0.91285
	0.842583				0.8931								0.836267
	0.8625				0.865517								0.841817
	0.8398				0.873917
	0.862383				0.881217
	0.892067				0.871417
	0.89525				0.8626
	0.8877
	0.817983
	0.8385
	0.837783
	0.80785
	0.8241
	0.84475
	0.8456
	0.97095
	0.814517
	0.946733
	0.8668
	0.905783
	0.890883
	0.869367
	0.814033
	0.890133
	0.853983
	0.87208
	0.828867
	0.744867
	0.82355
	0.810083
	0.802283
	0.82572
	0.850583
	0.834
	0.825983
	0.886933

## Sheet: Panel D
	α
	sfGFP		Adk-sfGFP		AroA-sfGFP		AcnA-sfGFP
	M9 salts	M9 salts, glu+CA	M9 salts	M9 salts, glu+CA	M9 salts	M9 salts, glu+CA	M9 salts	M9 salts, glu+CA
	0.835183	0.862317	0.971067	0.85364	0.8435	0.8515	0.863317	0.835433
	0.8544	0.825917	0.865133	0.83536	0.835267	0.91705	0.840117	0.840083
	0.868933	0.9039	0.935267	0.8201	0.890483	0.865475	0.77635	0.847083
	0.832733	0.810433	0.913333	0.84135	0.89768	0.918017	0.871067	0.88955
	0.79585	0.862433	0.849533	0.865	0.92894	0.951017	0.868567	0.925667
	0.82175	0.8383	0.9579	0.904975	0.915925	0.898225	0.829133	0.8825
	0.80845	0.849233	0.910767	0.913267	0.9614	0.85898	0.88575	0.856883
	0.905883	0.855867	0.870067	0.888233	0.897533	0.817133	0.839267	0.8427
	0.872517	0.84025	0.895933	0.846733	0.890525	0.948233	0.882433	0.87938
	0.816533	0.826017	0.832	0.861	0.894917	0.88604	0.81935	0.82664
		0.82205	0.835133	0.785433	0.866617	0.8336
		0.82672		0.8285
		0.911483
		0.901867
		0.838967
