# Supplementary material for: Dependence of diffusion in Escherichia coli cytoplasm on protein size, environmental conditions, and cell growth
Source: eLife. 2022 Dec 5;11:e82654. doi: 10.7554/eLife.82654 (PMC9810338; doi:10.7554/eLife.82654)
Supplement: Figure 5—figure supplement 4—source data 1. — Individual values of α from Figure 5—figure supplement 4B. [file elife-82654-fig5-figsupp4-data1.xlsx]

## Sheet: A
	1/tD (s-1)
	sfGFP
	Grown 25°C		Grown 37°C
	Measured 25°C	Measured 35°C	Measured 25°C	Measured 35°C
	2079.18	2102.52	1818.62	2276.32
	1742.56	2466.31	1759.3	2538.75
	1753.43	2212.43	1530.73	2965.09
	1567.82	1998.78	1900.42	2863.31
	1794.92	2712.76	1363.74	2217.66
	1885.32	2211.39	1318.79	2303.4
	2070.75	2288.04	2045.02	2379.45
	2121	2259.51	1470.75	2220.46
	2116.94	2070.37	1437.14	2341.66
	2132.41	2784.81	1487.02	1952.5
			1383.36	2331.9
			1887.24
			1157.1
			1383.59
			2093.57
			1764.1
			2342.71
			1805.44
			2145.23
			1534.05
			1530.77
			1814.97
			1977.26
			1723.62
			1884.23
			1952.98
			2379.88
			1560.16
			1534.96
			1962.42
			1472.92
			1577.76
			1699.98
			1788.19
			1983.01
			1793.71
			1987.98
			1805.29
			2207.43
			1996.91
			2091.65
			2071
			1636.68
			2306.36
			2175.84
			2138.98
			1953.74
			2061.22
			2066.97
			2072.47
			2212.49
			2276.81

## Sheet: B
	α
	sfGFP
	Grown 25°C		Grown 37°C
	Measured 25°C	Measured 35°C	Measured 25°C	Measured 35°C
	0.880983	0.879817	0.899283	0.8198
	0.895733	0.90385	0.93515	0.85964
	0.878417	0.78725	0.8684	0.86568
	0.91632	0.8626	0.881433	0.736933
	0.881967	0.950367	0.87565	0.84785
	0.82915	0.796783	0.874417	0.8788
	0.870067	0.827683	0.876067	0.80645
	0.8352	0.800667	0.818383	0.892017
	0.83455	0.8368	0.872083	0.85905
	0.892233	0.8472	0.844367	0.84184
			0.86645	0.75628
			0.8202	0.859967
			0.909367	0.7849
			0.84478	0.854483
			0.8545
			0.827617
			0.8334
			0.842583
			0.8625
			0.8398
			0.862383
			0.892067
			0.89525
			0.8877
			0.817983
			0.8385
			0.837783
			0.80785
			0.8241
			0.84475
			0.8456
			0.97095
			0.814517
			0.946733
			0.8668
			0.905783
			0.890883
			0.869367
			0.814033
			0.890133
			0.853983
			0.87208
			0.858283
			0.879783
			0.853933
			0.836817
			0.846017
