# Supplementary material for: Dependence of diffusion in Escherichia coli cytoplasm on protein size, environmental conditions, and cell growth
Source: eLife. 2022 Dec 5;11:e82654. doi: 10.7554/eLife.82654 (PMC9810338; doi:10.7554/eLife.82654)
Supplement: Figure 5—figure supplement 5—source data 1. — Individual values of α from Figure 5—figure supplement 5C. [file elife-82654-fig5-figsupp5-data1.xlsx]

## Sheet: Panel B
	1/tD (s-1)
	sfGFP		AcnA-sfGFP
	Cytoplasm	Nucleoid	Cytoplasm	Nucleoid
	730.356	739.692	1697.24	2155.2
	616.395	625.555	1531.83	2196.16
	909.212	796.381	1779.06	2196.55
	630.258	539.573	1468.21	1742.35
	564.854	940.244	1717.4	1906.73
	577.946	656.445	1478.74	1624.55
	476.714	673.36	1132.22	1303.73
	904.307	649.809	1878.07	1963.47
	507.863	658.924	1594.31	1478.79
	436.351	649.178	1229.08	1665.59

## Sheet: Panel C
	α
	sfGFP		AcnA-sfGFP
	Cytoplasm	Nucleoid	Cytoplasm	Nucleoid
	0.78327	0.90367	0.88885	0.88885
	0.87498	0.90522	0.8992	0.8992
	0.7023	0.89993	0.86106	0.86106
	0.90345	0.91657	0.89452	0.89452
	0.85205	0.69723	0.92568	0.92568
	0.8257	0.88353	0.9568	0.9568
	0.82772	0.81305	0.89137	0.89137
	0.81222	0.9012	0.90183	0.90183
	0.84495	0.90812	0.82087	0.82087
	0.77102	0.86808	0.85322	0.85322
