# Supplementary material for: Dependence of diffusion in Escherichia coli cytoplasm on protein size, environmental conditions, and cell growth
Source: eLife. 2022 Dec 5;11:e82654. doi: 10.7554/eLife.82654 (PMC9810338; doi:10.7554/eLife.82654)
Supplement: Figure 5—figure supplement 6—source data 1. — Individual values of α from Figure 5—figure supplement 6B. [file elife-82654-fig5-figsupp6-data1.xlsx]

## Sheet: A
	1/tD (s-1)
	sfGFP				AcnA-sfGFP
	M9 salts	M9 salts, Cam	M9 salts, glu+CA	M9 salts, glu+CA, Cam	M9 salts	M9 salts, Cam	M9 salts, glu+CA	M9 salts, glu+CA, Cam
	1759.16	1928.36	3215.52	3491.62	616.656	624.109	941.942	715.777
	2478.31	1927.35	3228.1	1467.67	1040.22	488.915	1155.19	1077.12
	1812.22	2179.22	2375.55	2185.83	455.063	421.387	1700.81	885.258
	1913.5	1819.2	1937.52	2681.67	493.074	583.07	1291.65	480.375
	1553.53	1417.85	2211.54	2202.63	690.314	509.116	876.731	618.745
	1985.72	1363.57	3909.3	2025.49	712.643	707.627	939.513	962.404
	1742.85	1583.12	4045.38	2076.79	750.94	582.24	877.266	748.873
	1436.07	2103.21	2870.25	2177.73	656.57	486.418	1501.13	923.104
	1430.79	1591.52	2656.14	1591.52	902.75		856.17	1128.06
	1748.67	2217.3	3817.69	1524.35	919.984		1122.44	624.133
		1109.33	3561.86	3454.38
		1639.01	1960.57	2342.62
		1934.17	2294.14	2286.46
			2760.58
			2678.34

## Sheet: B
	α
	sfGFP				AcnA-sfGFP
	M9 salts	M9 salts, Cam	M9 salts, glu+CA	M9 salts, glu+CA, Cam	M9 salts	M9 salts, Cam	M9 salts, glu+CA	M9 salts, glu+CA, Cam
	0.835183	0.841283	0.862317	0.908467	0.863317	0.8799	0.835433	0.9393
	0.8544	0.848133	0.825917	0.857233	0.840117	0.83616	0.840083	0.847933
	0.868933	0.889817	0.9039	0.896583	0.77635	0.799867	0.847083	0.89095
	0.832733	0.889667	0.810433	0.82165	0.871067	0.777983	0.88955	0.801983
	0.79585	0.861117	0.862433	0.81165	0.868567	0.78905	0.925667	0.83414
	0.82175	0.871117	0.8383	0.829933	0.829133	0.842483	0.8825	0.9069
	0.80845	0.902317	0.849233	0.867817	0.88575	0.83285	0.856883	0.87734
	0.905883	0.798283	0.855867	0.775	0.839267	0.794733	0.8427	0.886367
	0.872517	0.828783	0.84025	0.828783	0.882433		0.87938	0.840683
	0.816533	0.766017	0.826017	0.900133	0.81935		0.82664	0.896067
		0.8519	0.82205	0.852017
		0.896333	0.82672	0.896417
		0.894317	0.911483	0.870667
			0.901867
			0.838967
