# Supplementary material for: Dependence of diffusion in Escherichia coli cytoplasm on protein size, environmental conditions, and cell growth
Source: eLife. 2022 Dec 5;11:e82654. doi: 10.7554/eLife.82654 (PMC9810338; doi:10.7554/eLife.82654)
Supplement: Figure 5—figure supplement 7—source data 1. — Individual values of α from Figure 5—figure supplement 7B. [file elife-82654-fig5-figsupp7-data1.xlsx]

## Sheet: A
	1/tD (s-1)
	sfGFP				Adk-sfGFP				AcnA-sfGFP
	25°C		35°C		25°C		35°C		25°C		35°C
	Untreated	2 mM DNP	Untreated	2 mM DNP	Untreated	2 mM DNP	Untreated	2 mM DNP	Untreated	2 mM DNP	Untreated	2 mM DNP
	1818.62	1708.17	2276.32	2388.54	1032.24	1235.13	1842.29	1691.92	754.993	545.256	991.625	744.469
	1759.3	1845.69	2538.75	2408.02	1023.35	1277.22	1505.94	1408.98	834.837	764.38	977.893	1072.82
	1530.73	1542.7	2965.09	2787.61	1017.72	1309.89	1779.49	1399.66	689.924	506.558	747.024	911.562
	1900.42	1959.61	2863.31	2068.8	1212.34	1189.51	1622.57	1174.12	916.476	856.057	911.623	914.871
	1363.74	1831.66	2217.66	2763.36	1131.05	1189.79	1334.61	1245.87	646.849	582.312	911.06	1119.21
	1318.79		2303.4	2359.63	1418.28		1628.71	1318.55	802.801	864.394	958.86	1115
	2045.02		2379.45		1188.37		1756.71		802.186		1012.07
	1470.75		2220.46		1265.71		1486.12		628.07		958.622
	1437.14		2341.66		1281.93		1745.72		524.031		798.341
	1487.02		1952.5		1313.53		1675.75		691.368		1134.04
	1383.36		2331.9		1266.98		1631.71		662.639		995.446
	1887.24				1407.18		1463.88		569.115		1625.53
	1157.1				1495.39		1604.05		928.733		583.484
	1383.59				993.364		1641.95		820.253		1008.7
	2093.57				1376.99		1483.14		798.079		1170.63
	1764.1				1777.35		1771.36		861.195		773.865
	2342.71				1573.99		1453.02		739.282		1397.54
	1805.44				1723.62		1388.21		580.987		642.312
	2145.23				1303.93		1659		559.917
	1534.05				1137.32		1213.14
	1530.77				1234.8		1771.12
	1814.97				1155.85
	1977.26				1078.11
	1723.62
	1884.23
	1952.98
	2379.88
	1560.16
	1534.96
	1962.42
	1472.92
	1577.76
	1699.98
	1788.19
	1983.01
	1793.71
	1987.98
	1805.29
	2207.43
	1996.91
	2091.65
	2071
	1636.68
	2306.36
	2175.84
	2138.98
	1953.74
	2061.22
	2066.97
	2072.47
	2212.49
	2276.81

## Sheet: B
	α
	sfGFP				Adk-sfGFP				AcnA-sfGFP
	25°C		35°C		25°C		35°C		25°C		35°C
	Untreated	2 mM DNP	Untreated	2 mM DNP	Untreated	2 mM DNP	Untreated	2 mM DNP	Untreated	2 mM DNP	Untreated	2 mM DNP
	0.899283	0.850767	0.736933	0.808867	0.869167	0.8406	0.769	0.921167	0.872667	0.905125	0.811133	0.91
	0.93515	0.83322	0.84785	0.8371	0.897433	0.847267	0.84515	0.945333	0.8726	0.8637	0.804567	0.8113
	0.8684	0.82654	0.8788	0.844567	0.909733	0.8658	0.7992	0.870633	0.883483	0.799967	0.775717	0.852767
	0.881433	0.823367	0.80645	0.93735	0.858117	0.825967	0.8341	0.8144	0.861667	0.812767	0.8979	0.80635
	0.87565	0.8037	0.892017	0.8462	0.851367	0.855767	0.864883	0.8639	0.8208	0.9096	0.844533	0.929633
	0.874417		0.85905	0.846267	0.892783		0.84635	0.836167	0.869817	0.86574	0.815633	0.853633
	0.876067		0.84184		0.8788		0.823625		0.861183		0.83935
	0.818383		0.75628		0.852317		0.82392		0.856817		0.8672
	0.872083		0.859967		0.89685		0.78728		0.901133		0.883425
	0.844367		0.7849		0.824817		0.884383		0.83475		0.88685
	0.86645		0.854483		0.893917		0.831217		0.912883		0.7607
	0.8202				0.882267		0.8744		0.846367		0.839333
	0.909367				0.89095		0.845067		0.833783		0.8032
	0.84478				0.88285		0.799267		0.826867		0.898733
	0.8545				0.909833		0.900733		0.8729		0.87348
	0.827617				0.870867		0.83775		0.84		0.8861
	0.8334				0.874833		0.92775		0.91285		0.9121
	0.842583				0.8931		0.908833		0.836267		0.846367
	0.8625				0.865517		0.840417		0.841817
	0.8398				0.873917		0.873767
	0.862383				0.881217		0.880383
	0.892067				0.871417
	0.89525				0.8626
	0.8877
	0.817983
	0.8385
	0.837783
	0.80785
	0.8241
	0.84475
	0.8456
	0.97095
	0.814517
	0.946733
	0.8668
	0.905783
	0.890883
	0.869367
	0.814033
	0.890133
	0.853983
	0.87208
	0.828867
	0.744867
	0.82355
	0.810083
	0.802283
	0.82572
	0.850583
	0.834
	0.825983
	0.886933
