# Supplementary material for: Dependence of diffusion in Escherichia coli cytoplasm on protein size, environmental conditions, and cell growth
Source: eLife. 2022 Dec 5;11:e82654. doi: 10.7554/eLife.82654 (PMC9810338; doi:10.7554/eLife.82654)
Supplement: Figure 5—source data 1. — Individual mean and standard error of the mean of 1/τD values from Figure 5B. Individual mean and standard error of the mean of 1/τD values from Figure 5C. Individual mean and standard error of the mean of 1/τD values from Figure 5D. [file elife-82654-fig5-data1.xlsx]

## Sheet: Panel A
			1/tD (s-1)
			105 mM		305 mM
	Construct	Molecular mass (kDa)	Average	SEM	Average	SEM
	sfGFP	26.9	1833.2	41.2039	1264.97	121.919
	Adk-sfGFP	50.558	1278.67	43.8174	923.461	86.1522
	AroA-sfGFP	73.068	1050.18	73.8646	777.119	71.3102
	AcnA-sfGFP	124.672	726.933	27.3823	483.902	78.6113

## Sheet: Panel B
			1/tD (s-1)
			25°C		35°C
	Construct	Molecular mass (kDa)	Average	SEM	Average	SEM
	sfGFP	26.9	1833.2	41.2039	2399.14	83.9153
	Adk-sfGFP	50.558	1278.67	43.8174	1593.26	35.2605
	AcnA-sfGFP	124.672	726.933	27.3823	977.704	57.3222

## Sheet: Panel C
			1/tD (s-1)
			Untreated		Chloramphenicol		DMSO		Rifampicin
	Construct	Molecular mass (kDa)	Average	SEM	Average	SEM	Average	SEM	Average	SEM
	sfGFP	26.9	1833.2	41.2039	1677.7	165.249	2158.01	72.4412	2516.35	105.747
	Adk-sfGFP	50.558	1278.67	43.8174	1089.33	99.4972	1479.43	39.4124	1892.29	76.0661
	Pgk-sfGFP	68.09	990.588	40.6901	902.266	77.7259	1125.83	36.7063	1632.85	52.4686
	AcnA-sfGFP	124.672	726.933	27.3823	432.154	37.9047	902.749	54.8461	1107.22	32.7637

## Sheet: Panel D
			1/tD (s-1)
			M9 salts		M0 salts, glu + CA
	Construct	Molecular mass (kDa)	Average	SEM	Average	SEM
	sfGFP	26.9	1786.08	91.8024	2901.5	174.762
	Adk-sfGFP	50.558	1130.8	54.0452	1690.35	89.1633
	AroA-sfGFP	73.068	952.848	33.6564	1341.94	33.0626
	AcnA-sfGFP	124.672	723.821	56.0417	1126.28	87.4587
