# Supplementary material for: Dependence of diffusion in Escherichia coli cytoplasm on protein size, environmental conditions, and cell growth
Source: eLife journal article supplement (doi:10.7554/elife.82654), 2022-12-05

kDa

ClpS<sup>WT</sup>-sfGFP

ClpS<sup>D35A\_D36A\_H66A</sup>-sfGFP

DnaK<sup>WT</sup>-sfGFP

DnaK<sup>V436F</sup>-sfGFP

Map<sup>WT</sup>-sfGFP

Map<sup>K211A\_K218A\_K224A\_K226A</sup>-sfGFP

Map<sup>K211E\_K218E\_K224E\_K226E</sup>-sfGFP

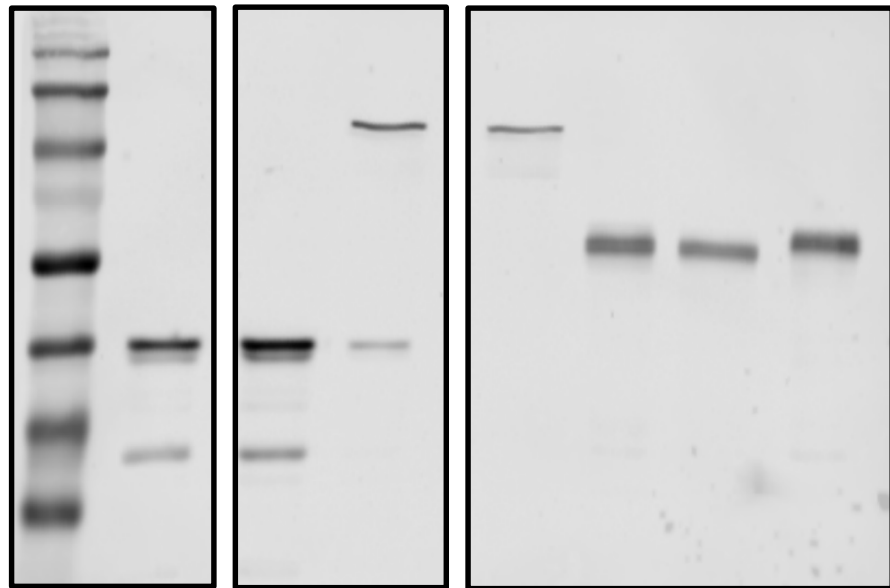

Supplement: supp [file elife_poa_e82654_Figure_1_figure_supplement_9.pdf › elife_poa_e82654_Figure_1_figure_supplement_9.pdf]
