# Supplementary figures and images for: Dependence of diffusion in Escherichia coli cytoplasm on protein size, environmental conditions, and cell growth
Source: eLife journal article supplement (doi:10.7554/elife.82654), 2022-12-05

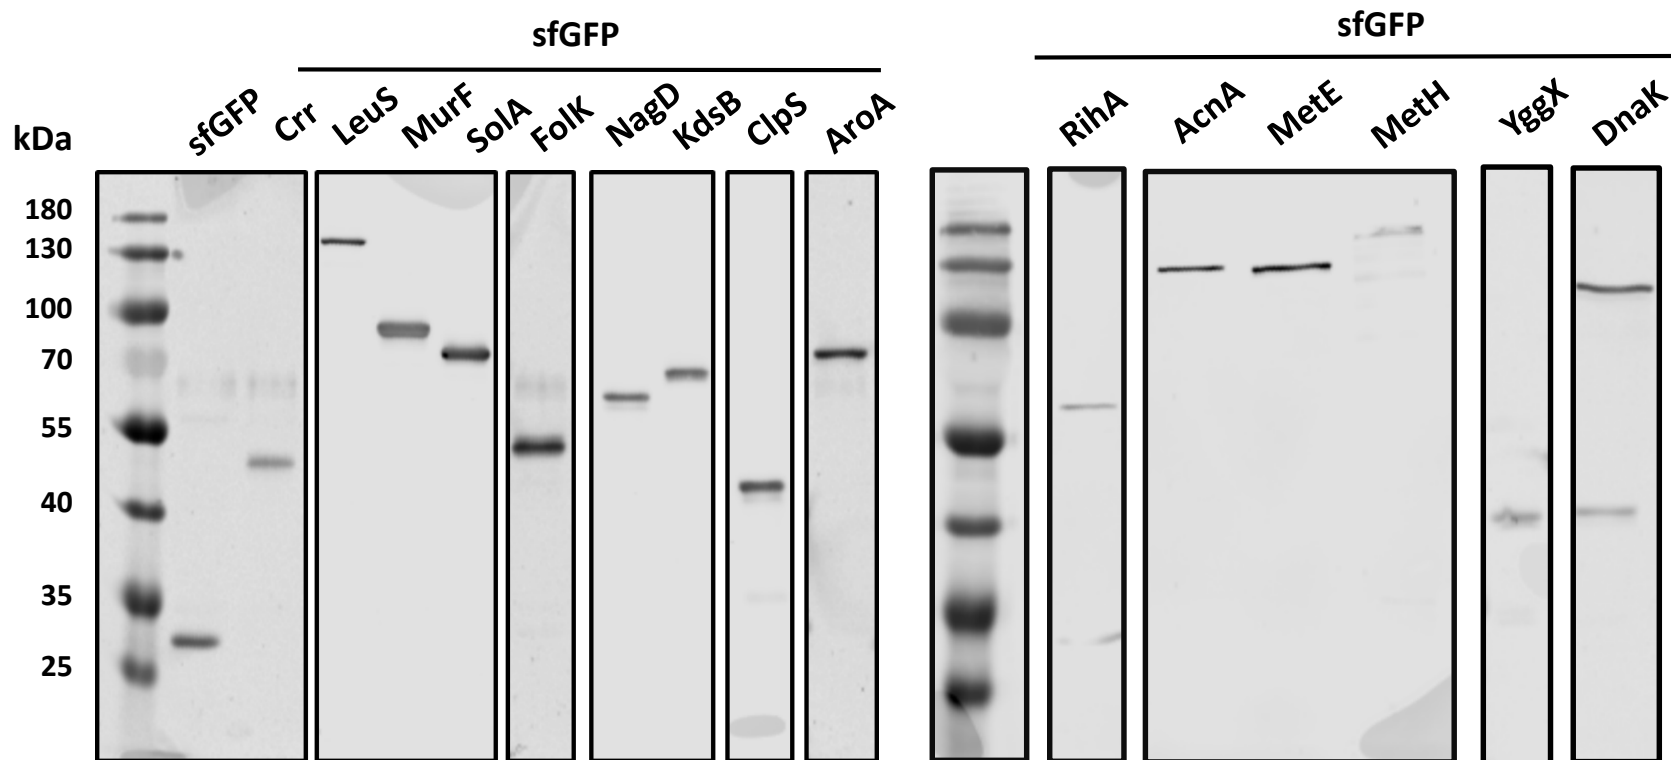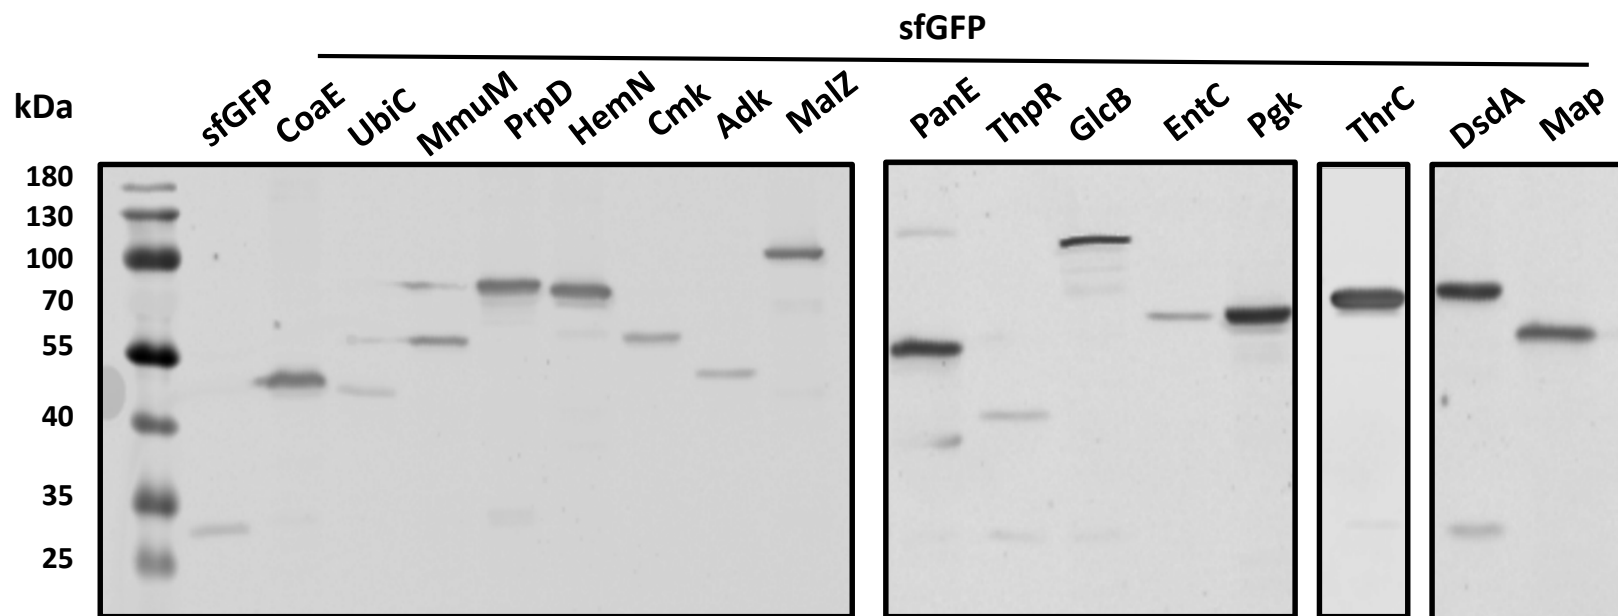

Supplement: supp [file elife_poa_e82654_Figure_1_figure_supplement_1.pdf › elife_poa_e82654_Figure_1_figure_supplement_1.pdf]

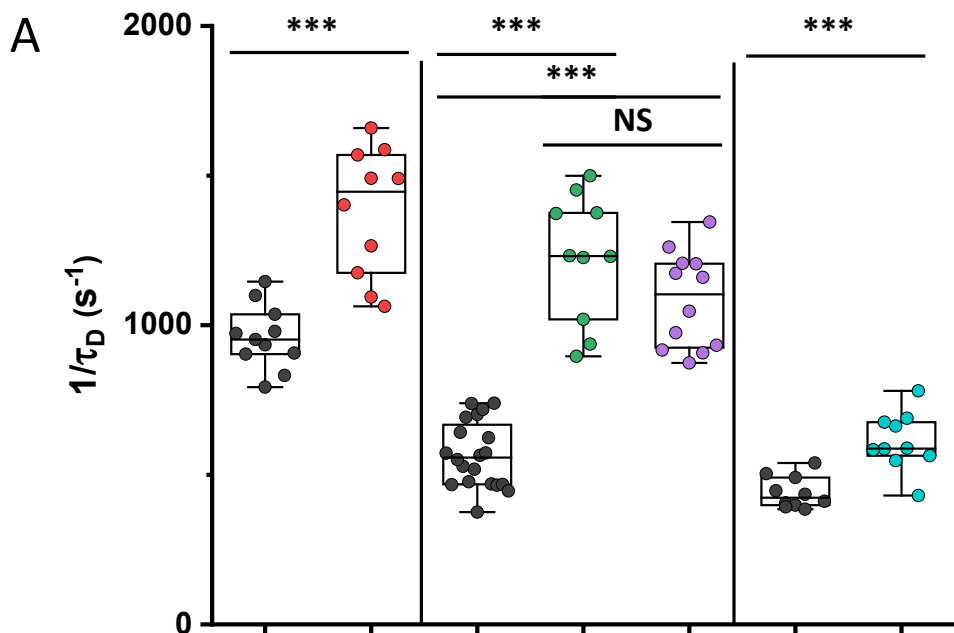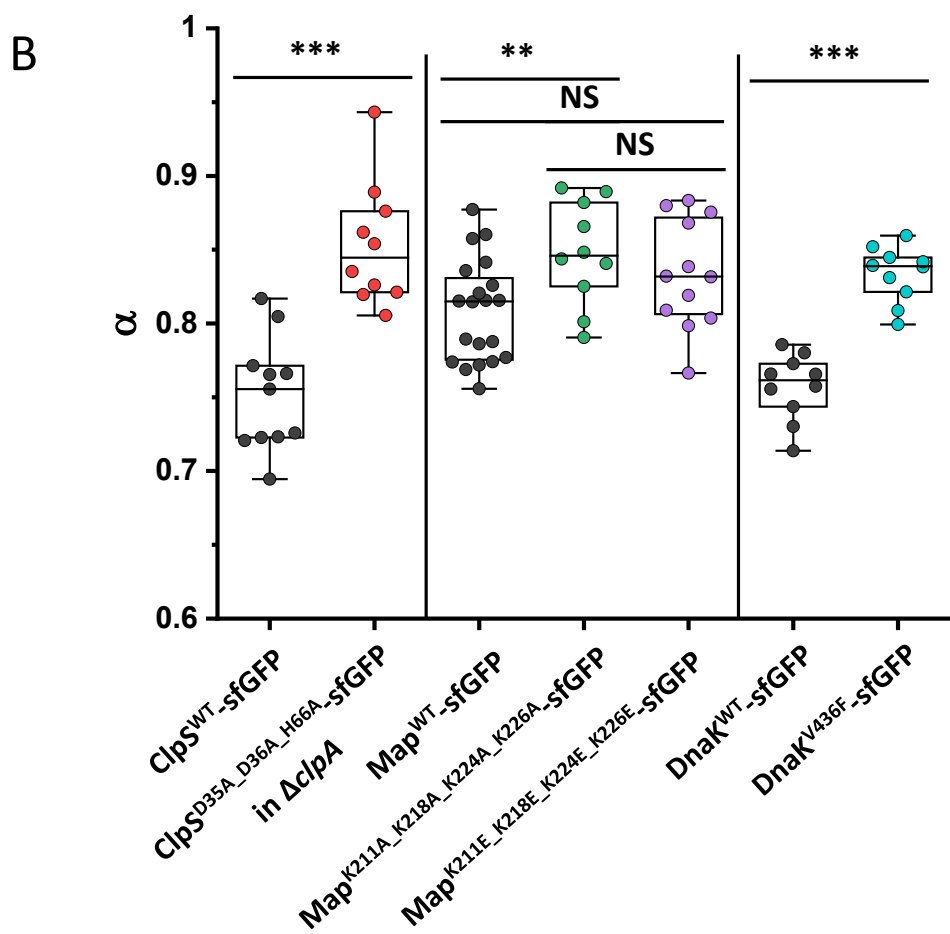

Supplement: supp [file elife_poa_e82654_Figure_1_figure_supplement_10.pdf › elife_poa_e82654_Figure_1_figure_supplement_10.pdf]

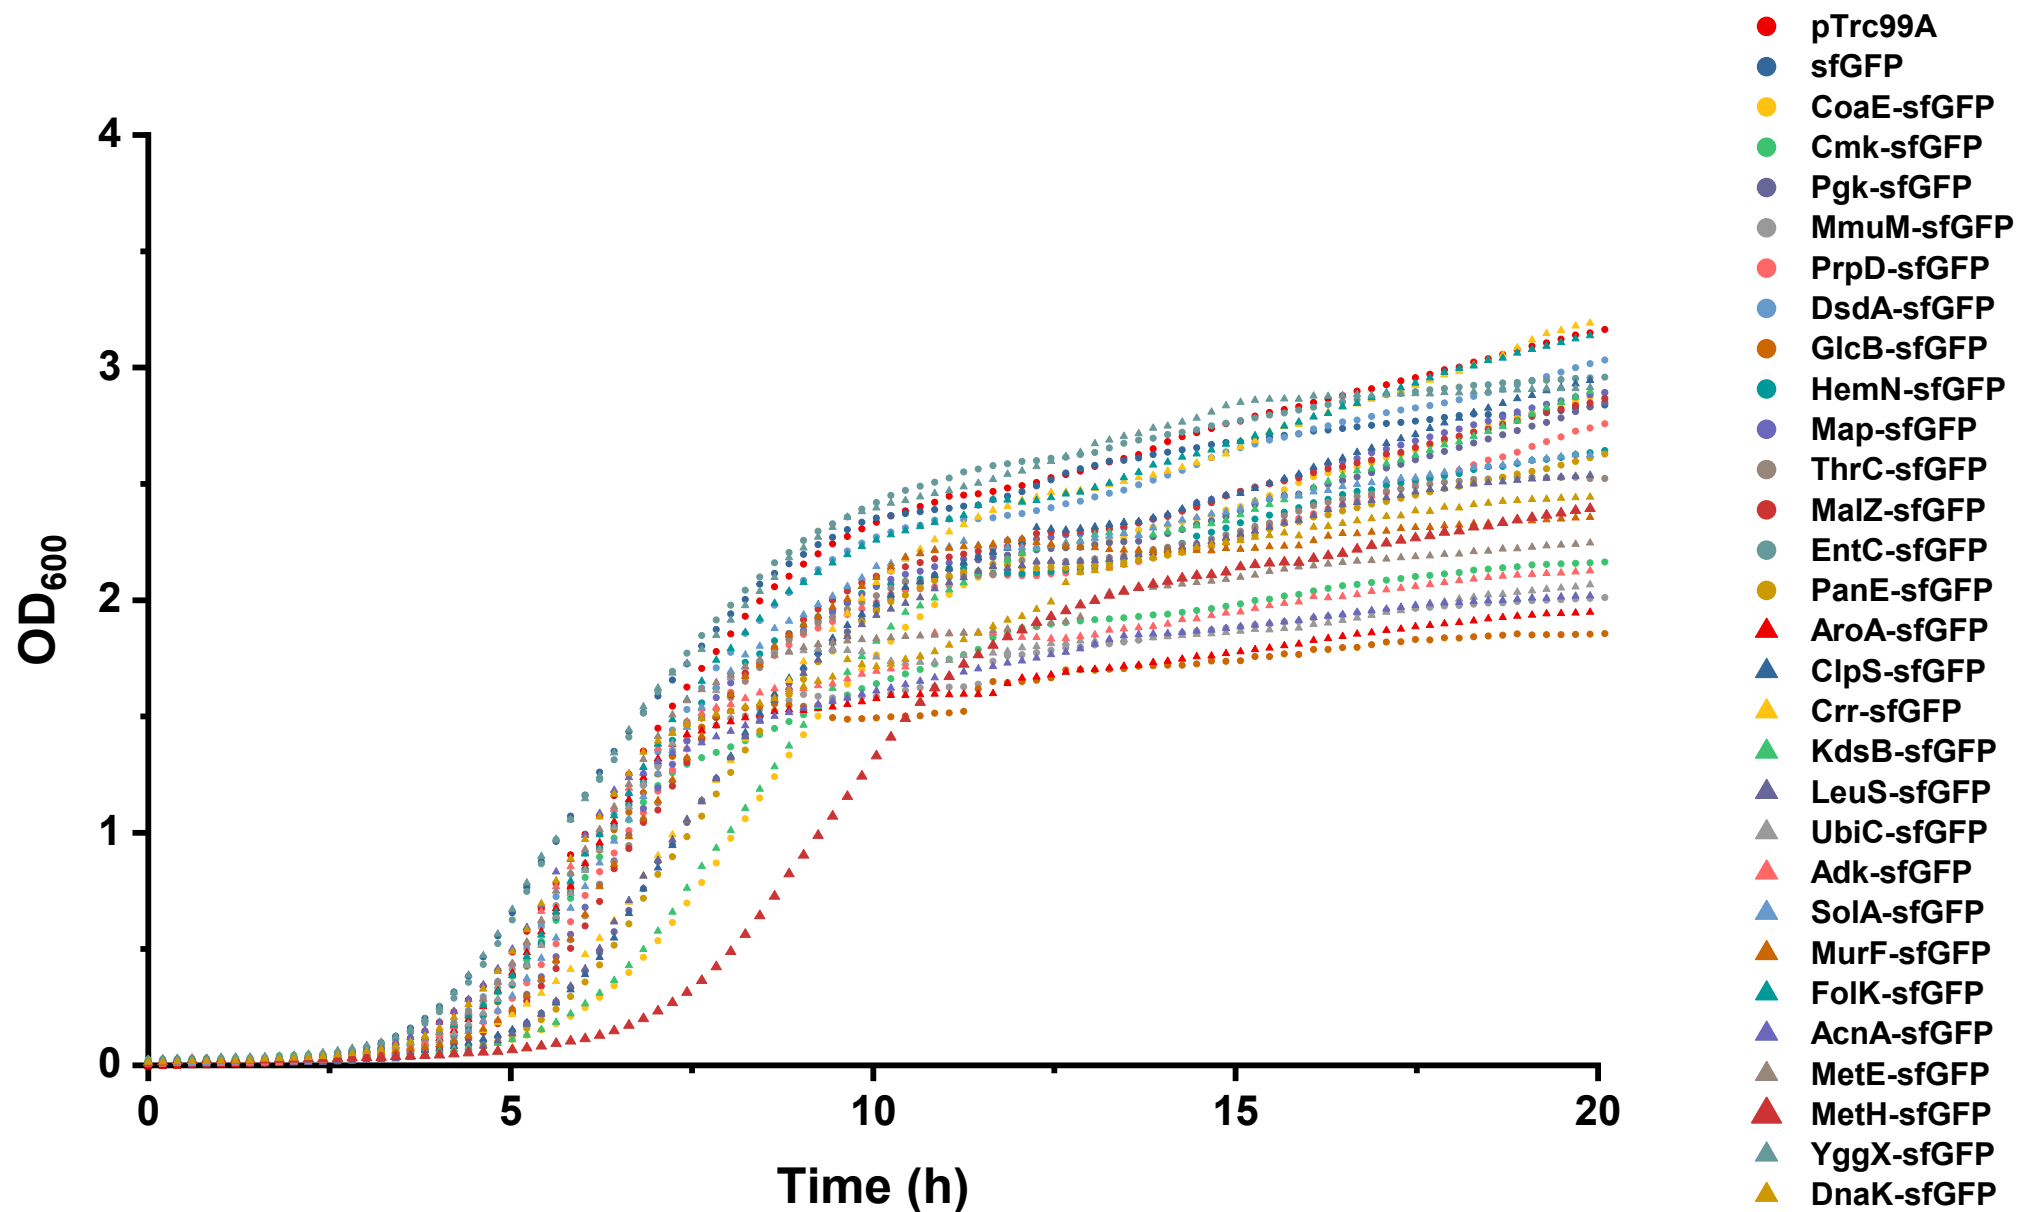

Supplement: supp [file elife_poa_e82654_Figure_1_figure_supplement_2.pdf › elife_poa_e82654_Figure_1_figure_supplement_2.pdf]

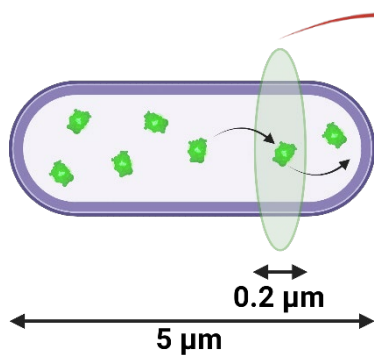

| Measure                 | $\tau_D\ (\mu\text{s})$ | $\alpha$            |
|-------------------------|-------------------------|---------------------|
| R1                      | 536                     | 0.79                |
| R2                      | 535                     | 0.81                |
| R3                      | 517                     | 0.84                |
| R4                      | 595                     | 0.88                |
| R5                      | 531                     | 0.81                |
| R6                      | 605                     | 0.90                |
| Avg. ( $\pm\text{SD}$ ) | 553 ( $\pm 34$ )        | 0.84 ( $\pm 0.04$ ) |

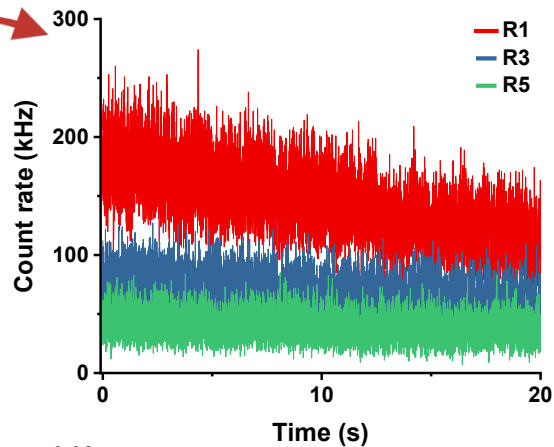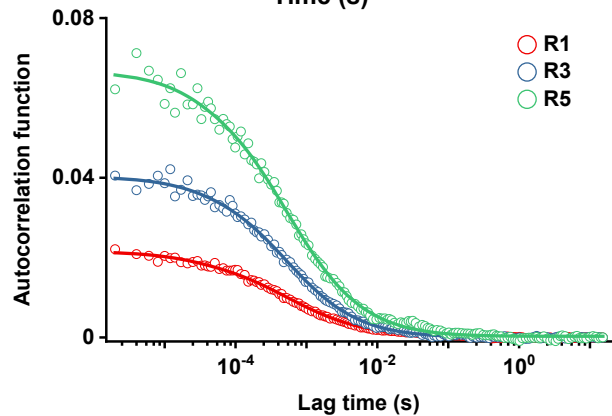

Supplement: supp [file elife_poa_e82654_Figure_1_figure_supplement_3.pdf › elife_poa_e82654_Figure_1_figure_supplement_3.pdf]

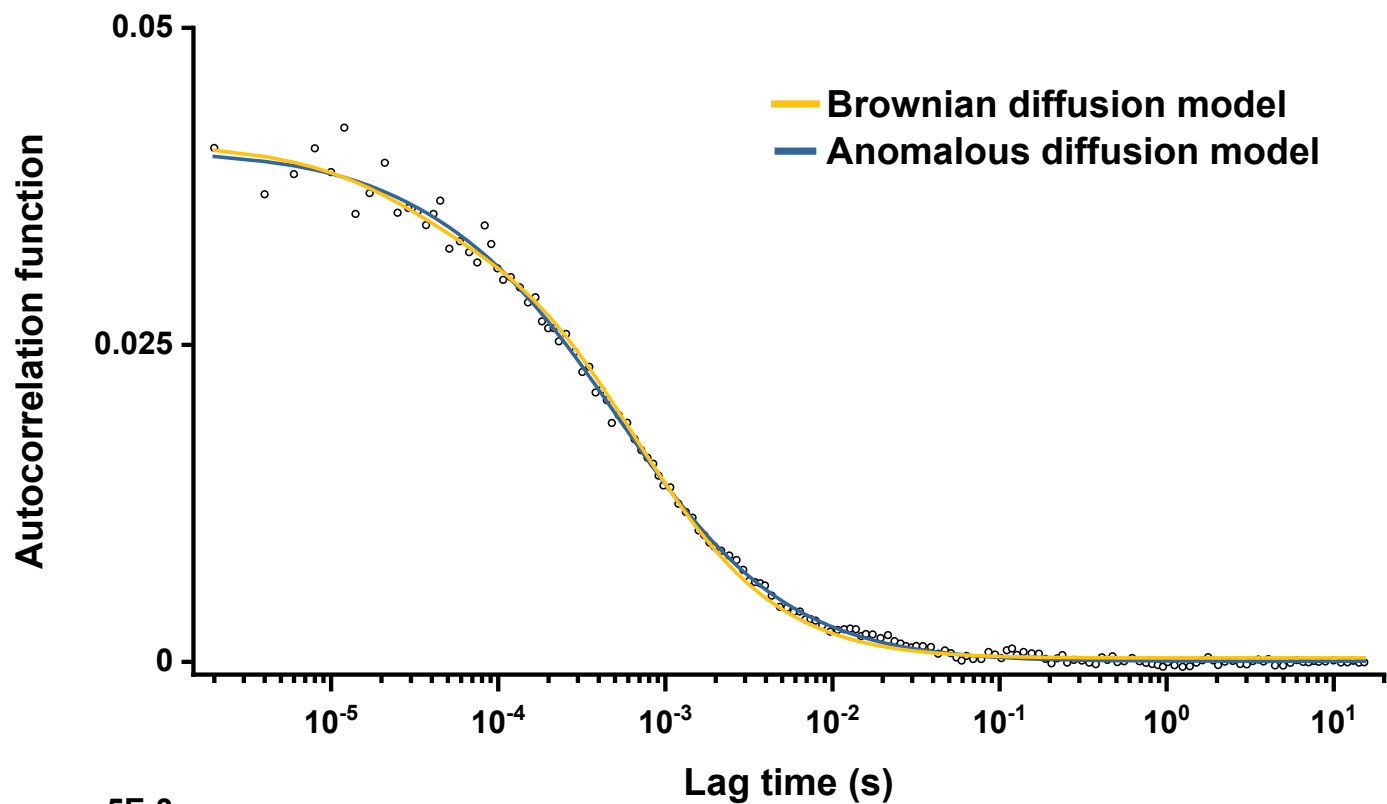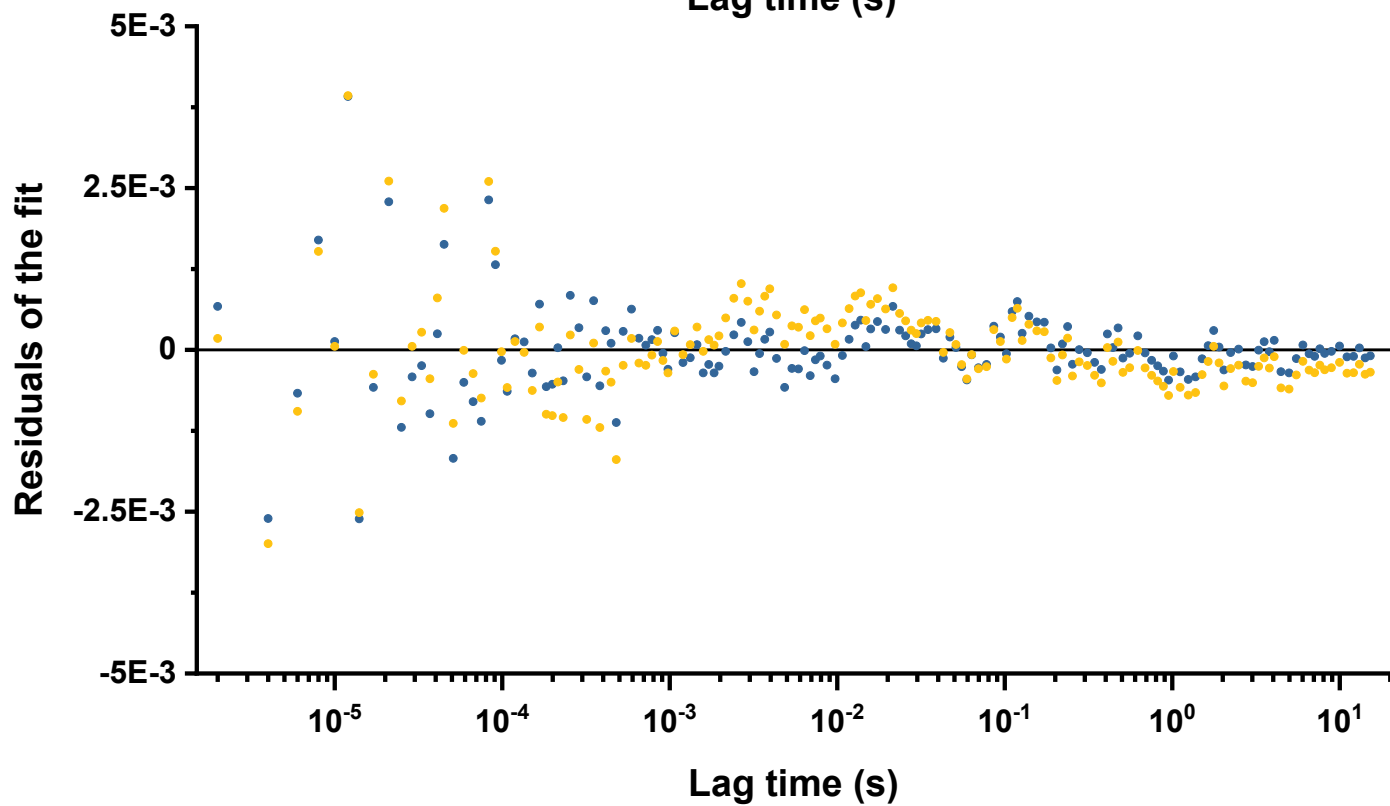

Supplement: supp [file elife_poa_e82654_Figure_1_figure_supplement_4.pdf › elife_poa_e82654_Figure_1_figure_supplement_4.pdf]

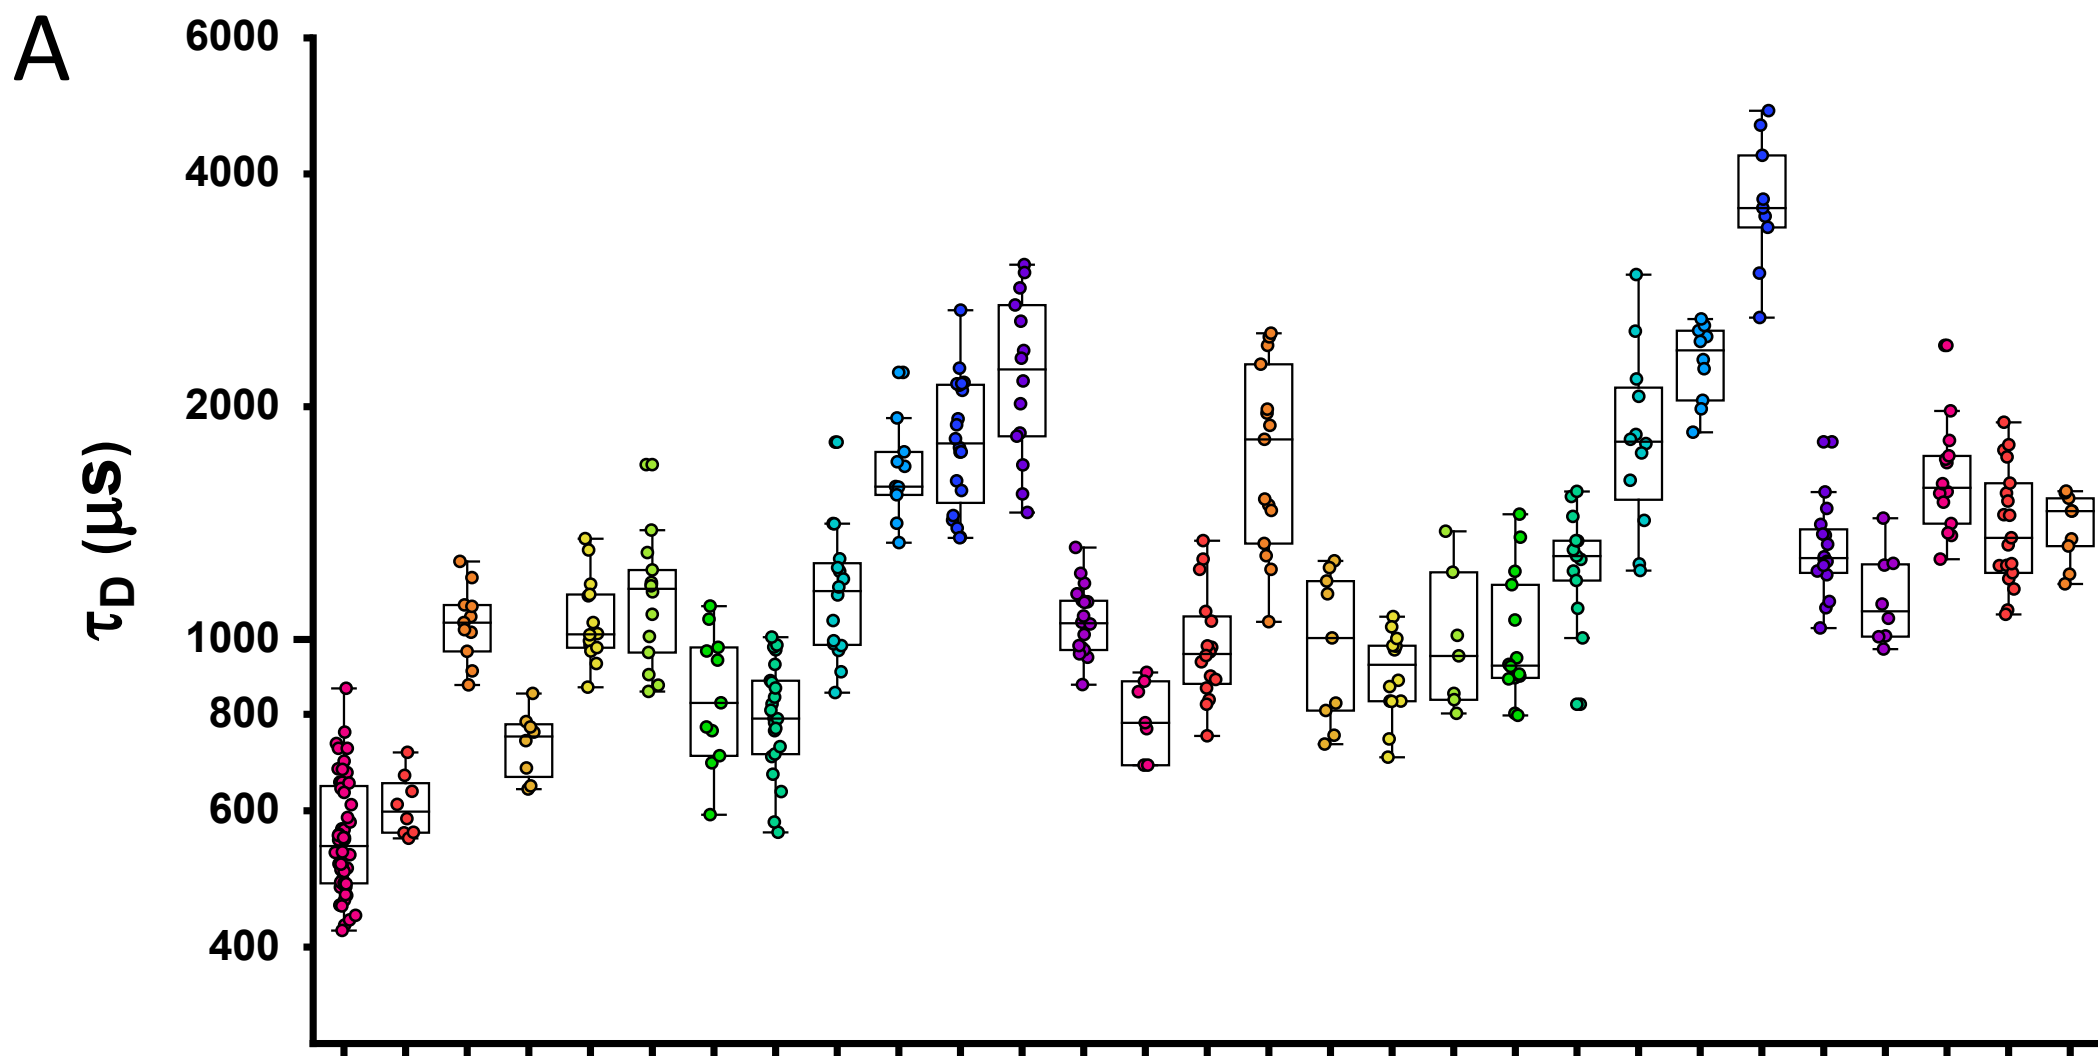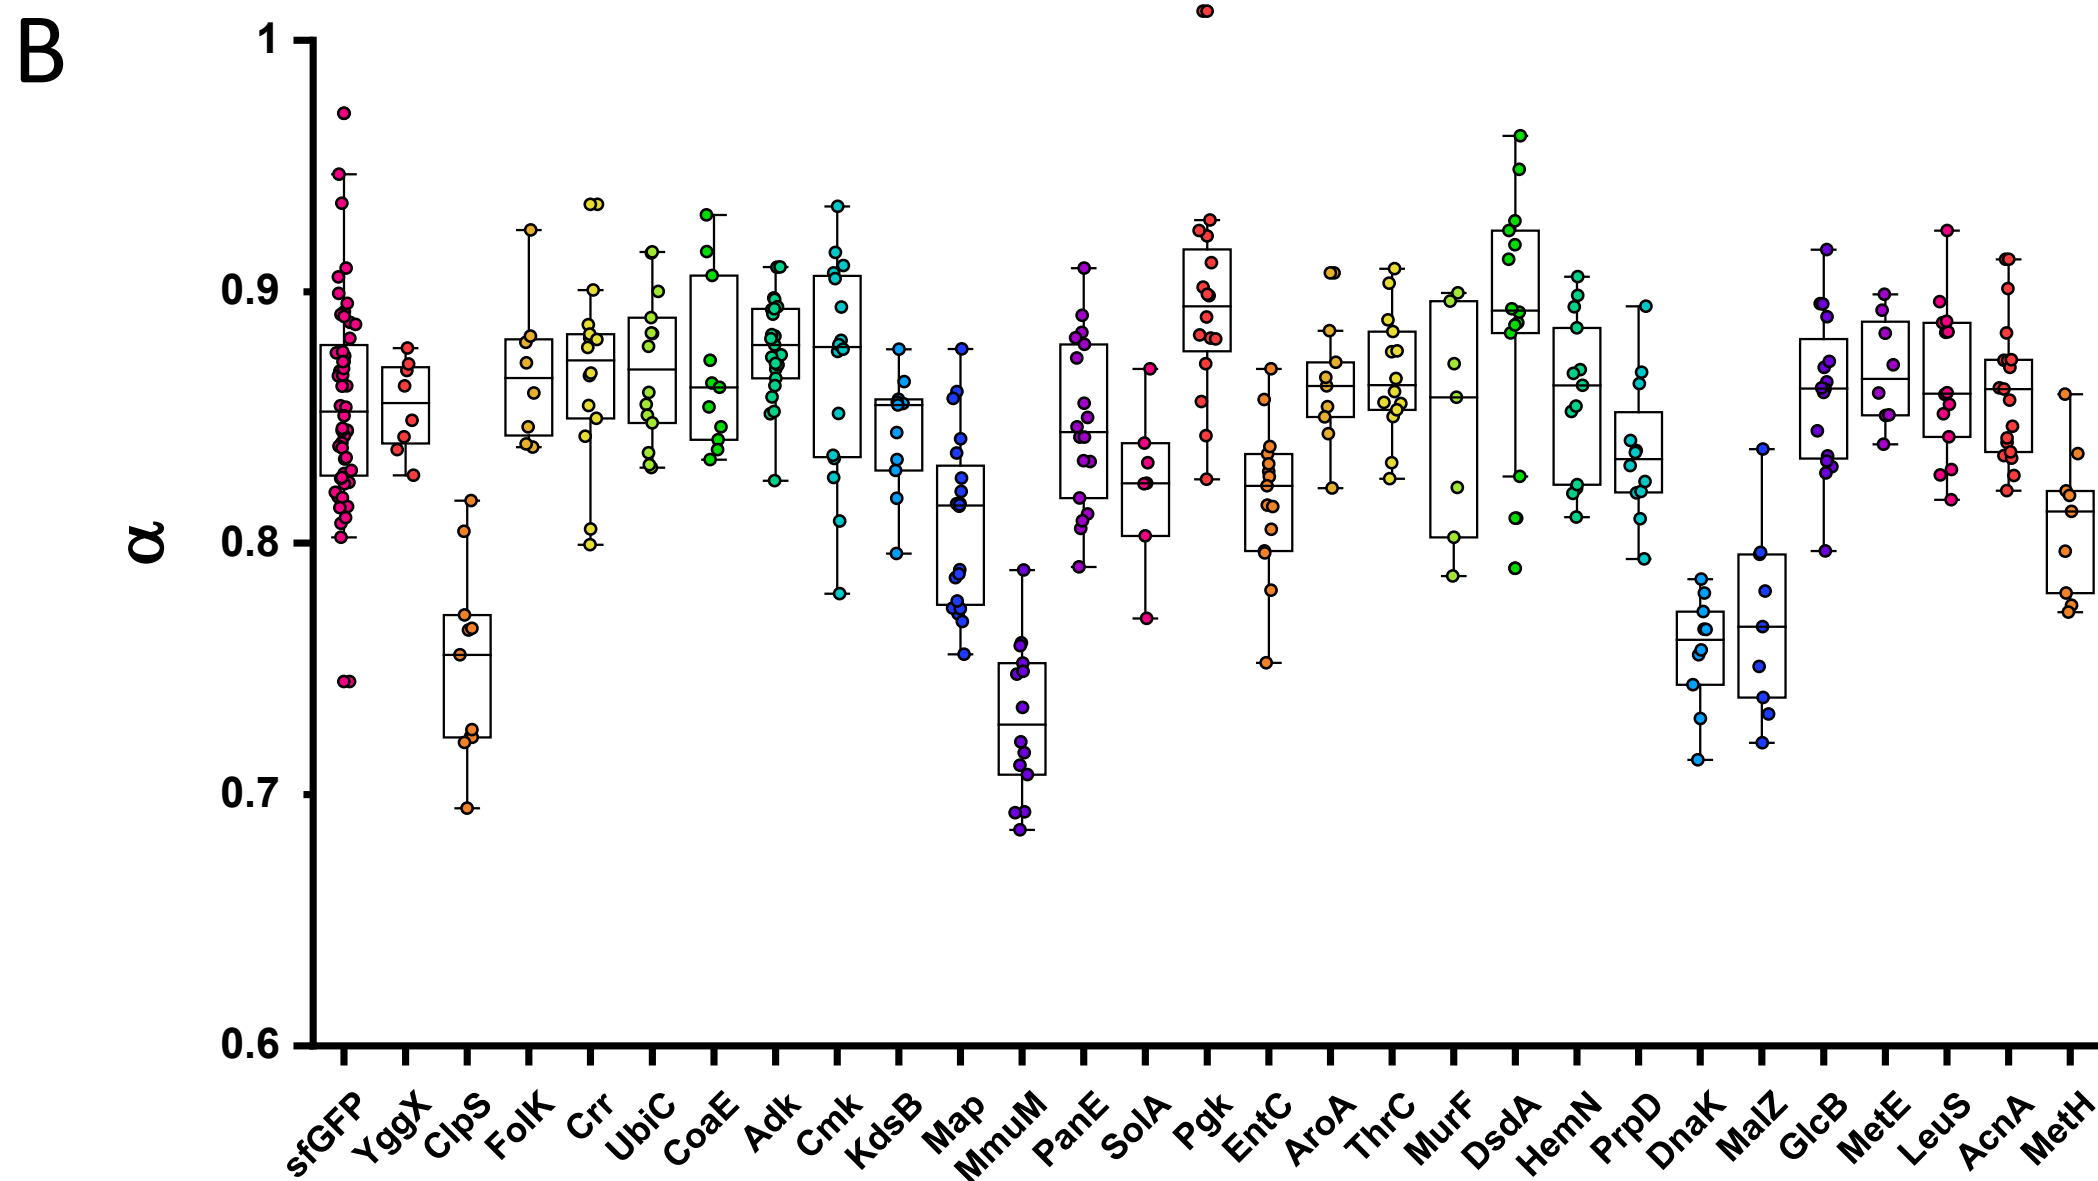

Supplement: supp [file elife_poa_e82654_Figure_1_figure_supplement_5.pdf › elife_poa_e82654_Figure_1_figure_supplement_5.pdf]

A

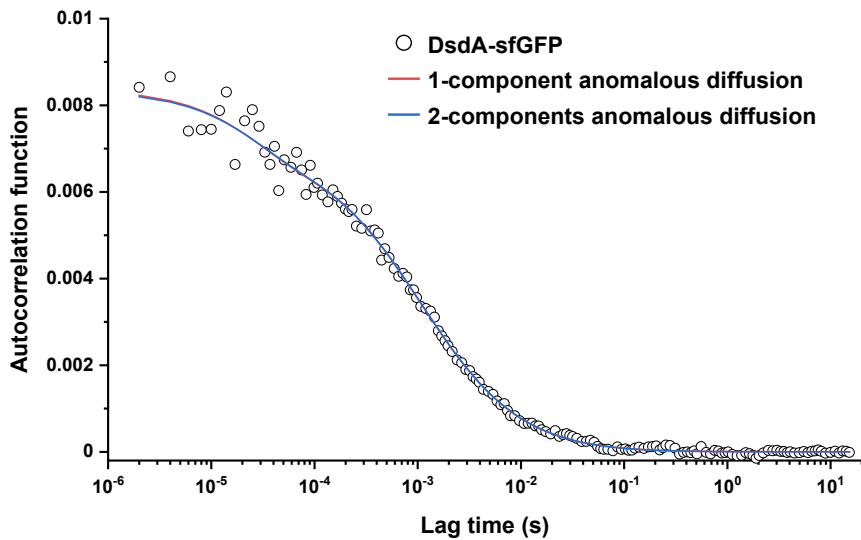

B

| Model        | $\tau_D$ ( $\mu$ s; avg. $\pm$ SE) | $\alpha$ (avg. $\pm$ SE) |
|--------------|------------------------------------|--------------------------|
| 1-component  | $1017 \pm 53$                      | $0.89 \pm 0.01$          |
| 2-components | $1092 \pm 62$                      | $0.88 \pm 0.02$          |

Supplement: supp [file elife_poa_e82654_Figure_1_figure_supplement_6.pdf › elife_poa_e82654_Figure_1_figure_supplement_6.pdf]

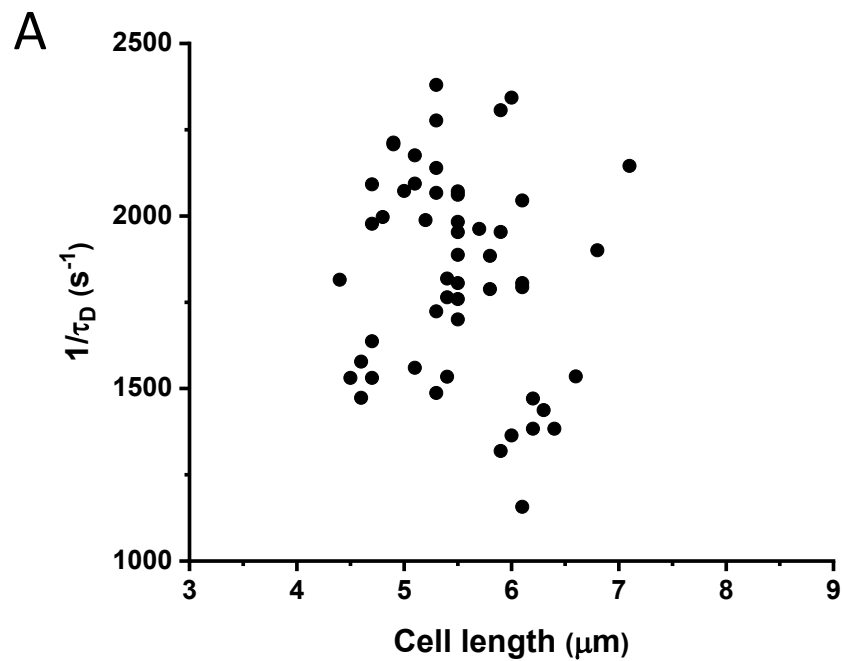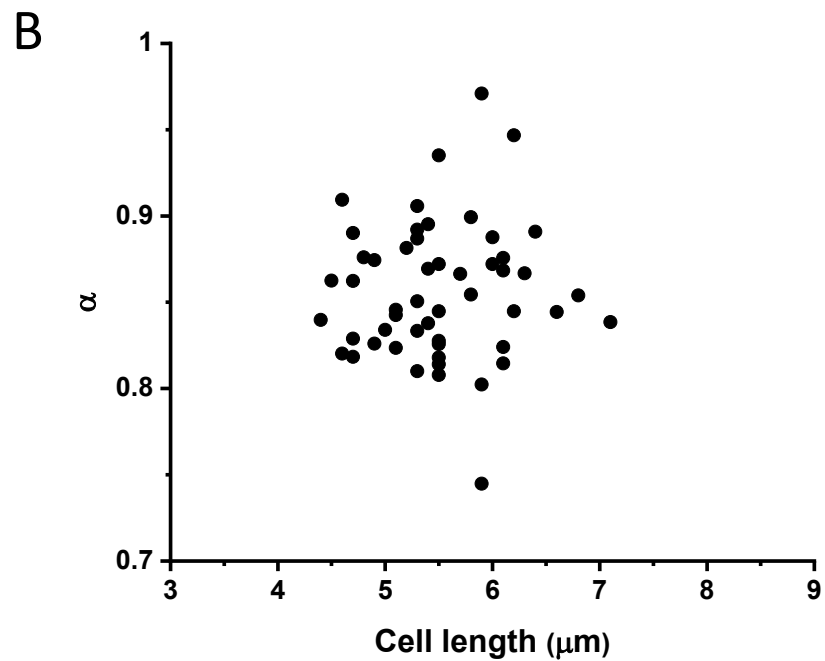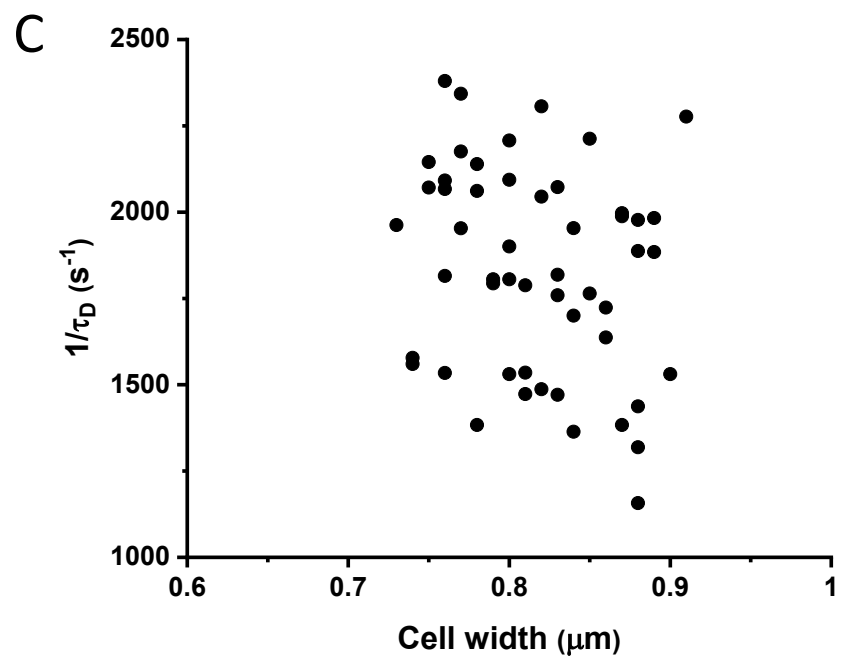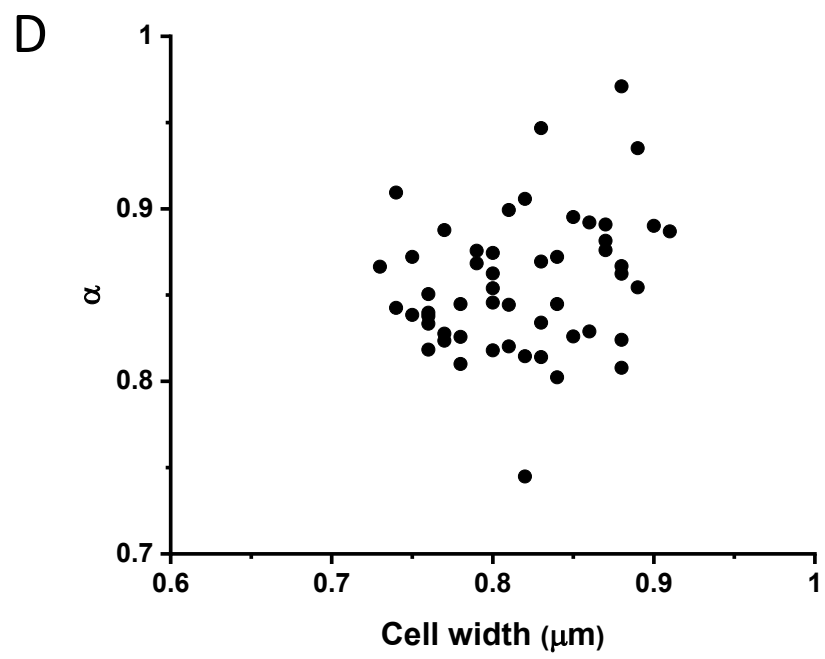

Supplement: supp [file elife_poa_e82654_Figure_1_figure_supplement_7.pdf › elife_poa_e82654_Figure_1_figure_supplement_7.pdf]

A

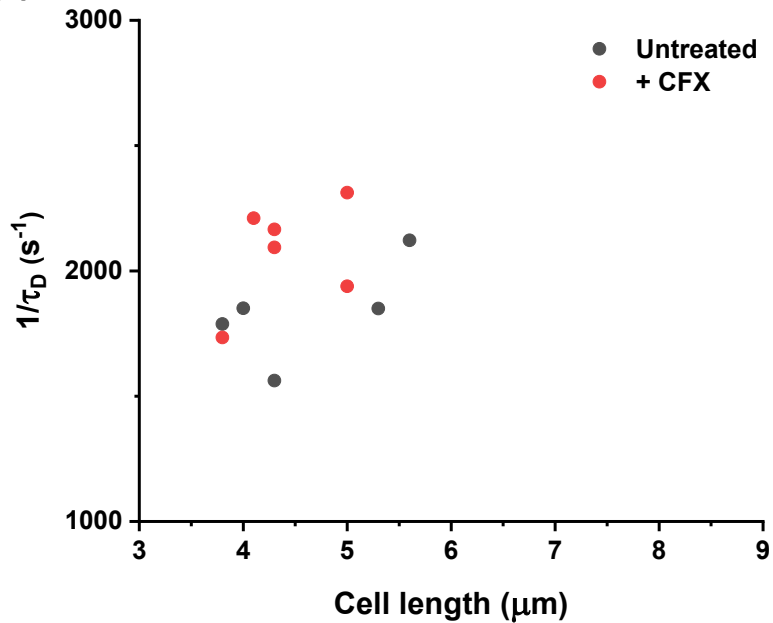

B

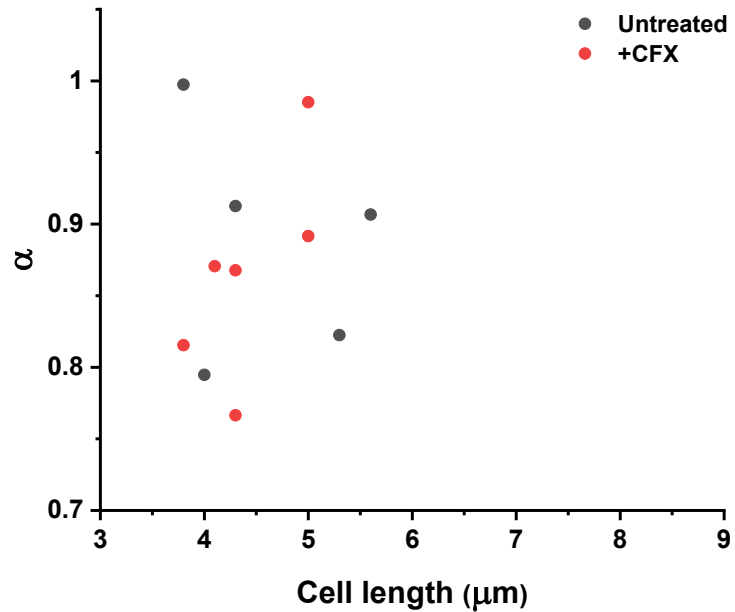

Supplement: supp [file elife_poa_e82654_Figure_1_figure_supplement_8.pdf › elife_poa_e82654_Figure_1_figure_supplement_8.pdf]

A

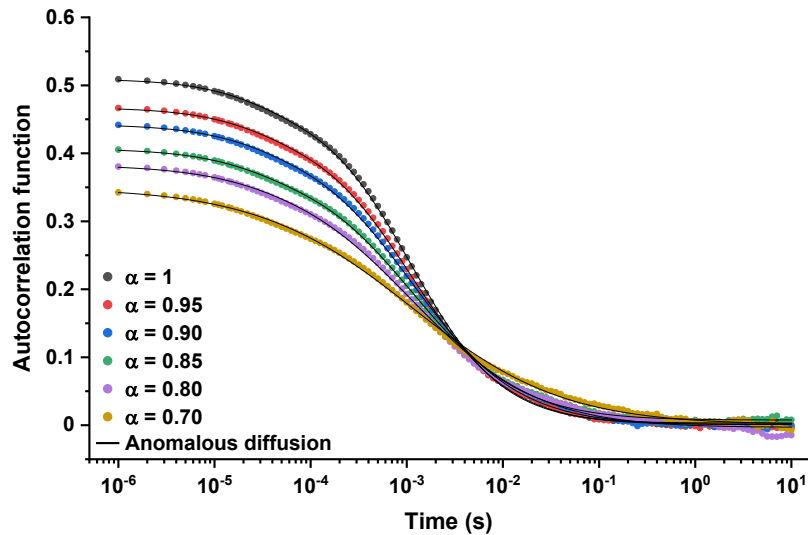

B

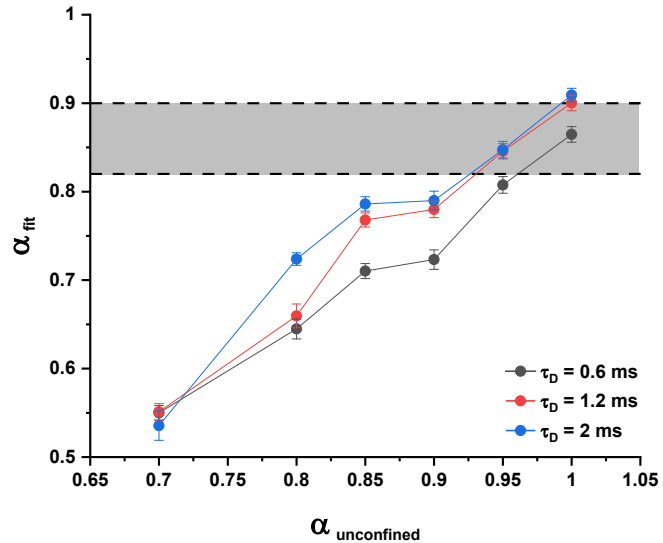

Supplement: supp [file elife_poa_e82654_Figure_2_figure_supplement_1.pdf › elife_poa_e82654_Figure_2_figure_supplement_1.pdf]

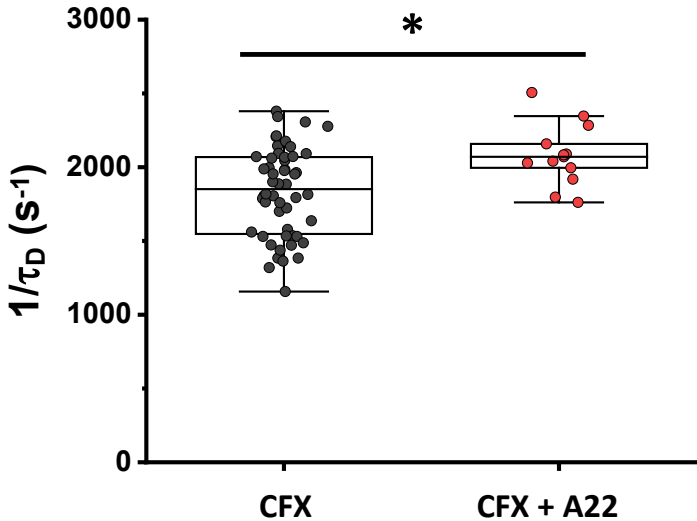

Supplement: supp [file elife_poa_e82654_Figure_2_figure_supplement_2.pdf › elife_poa_e82654_Figure_2_figure_supplement_2.pdf]

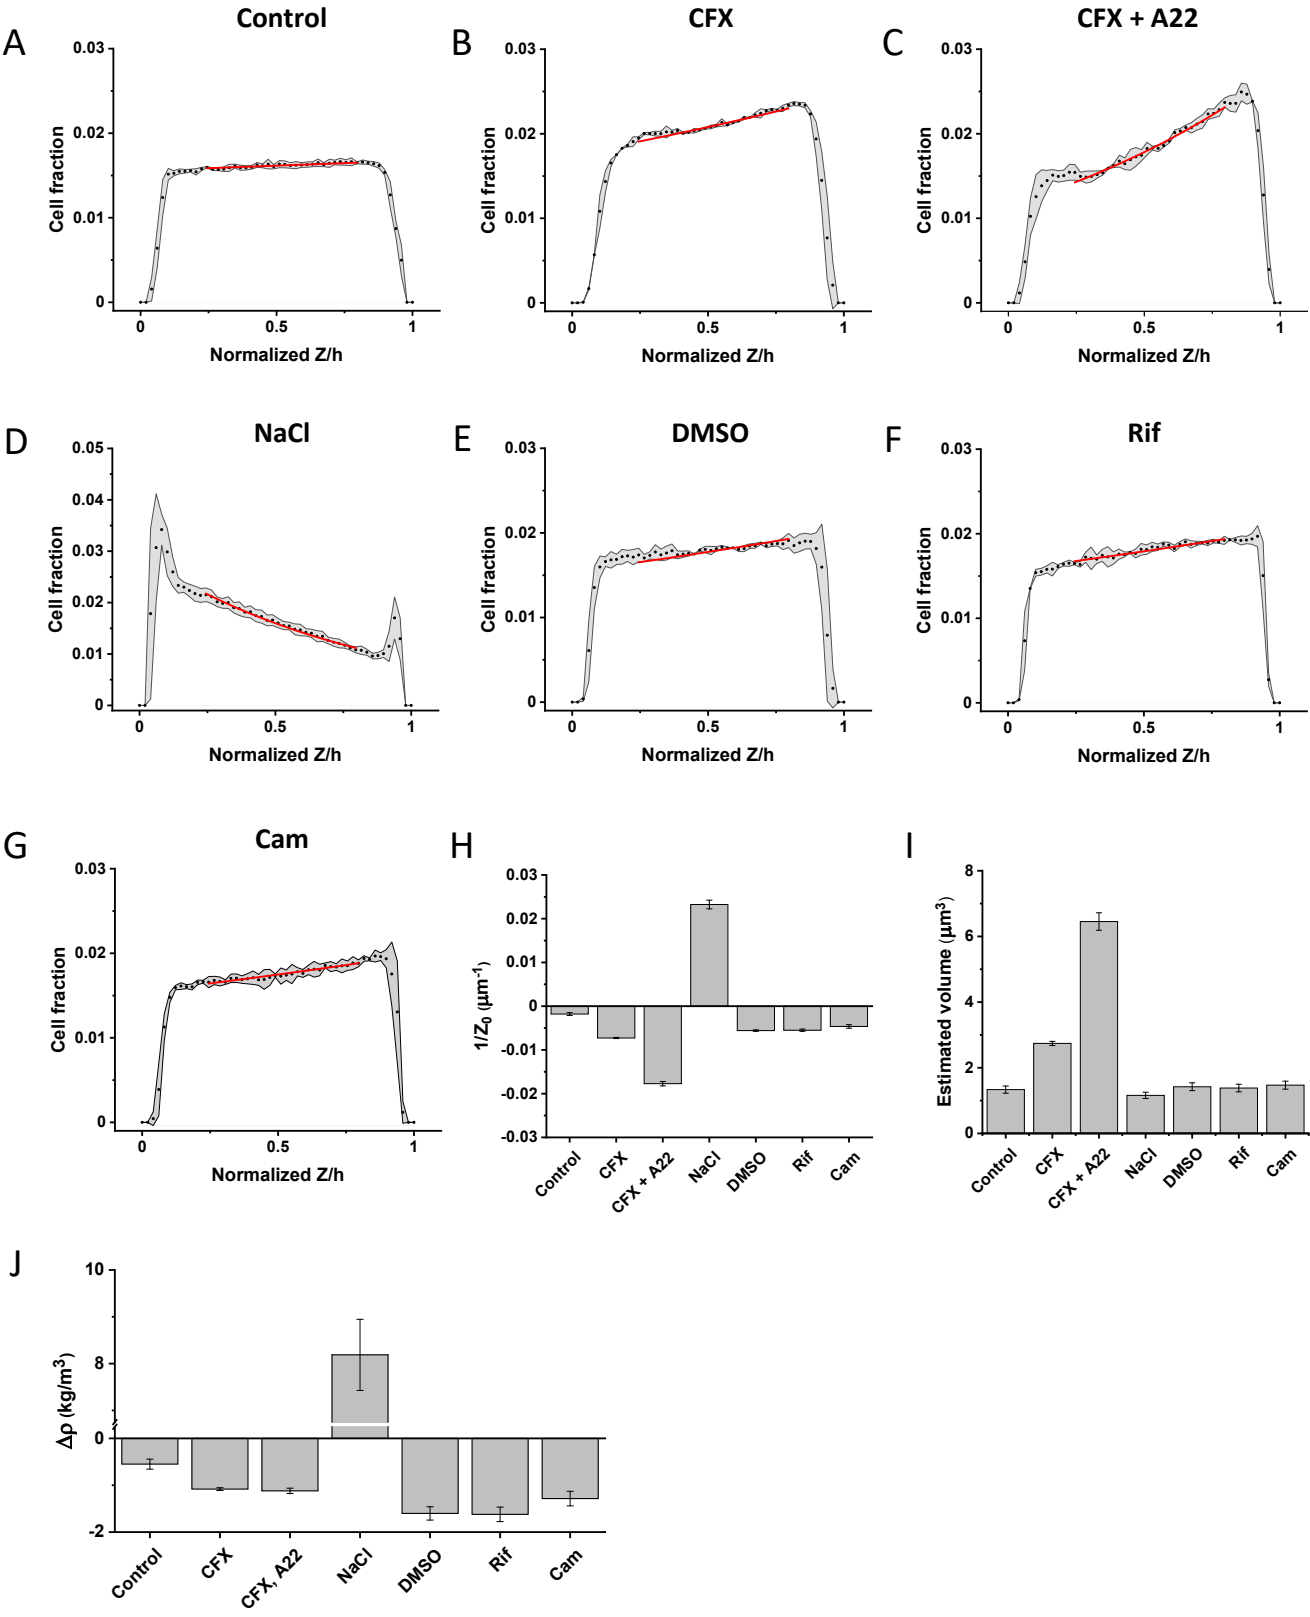

Supplement: supp [file elife_poa_e82654_Figure_2_figure_supplement_3.pdf › elife_poa_e82654_Figure_2_figure_supplement_3.pdf]

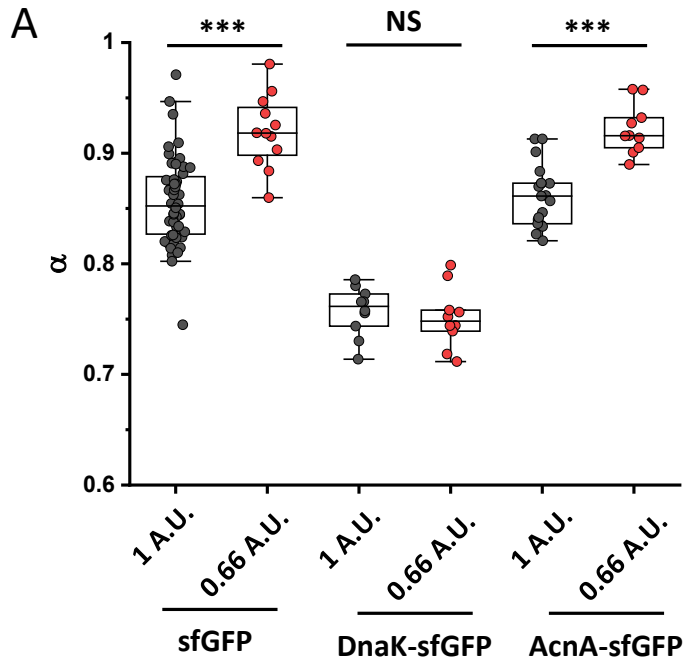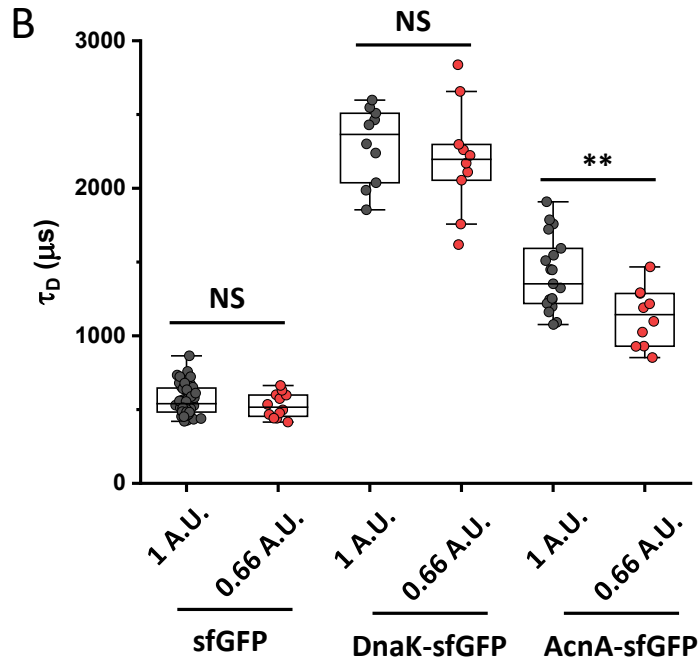

Supplement: supp [file elife_poa_e82654_Figure_2_figure_supplement_4.pdf › elife_poa_e82654_Figure_2_figure_supplement_4.pdf]

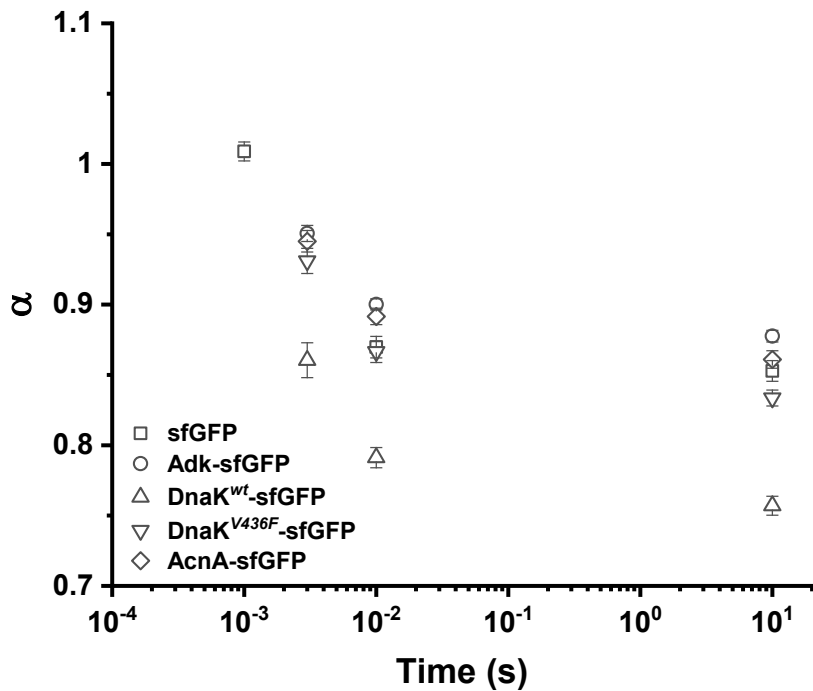

Supplement: supp [file elife_poa_e82654_Figure_2_figure_supplement_5.pdf › elife_poa_e82654_Figure_2_figure_supplement_5.pdf]

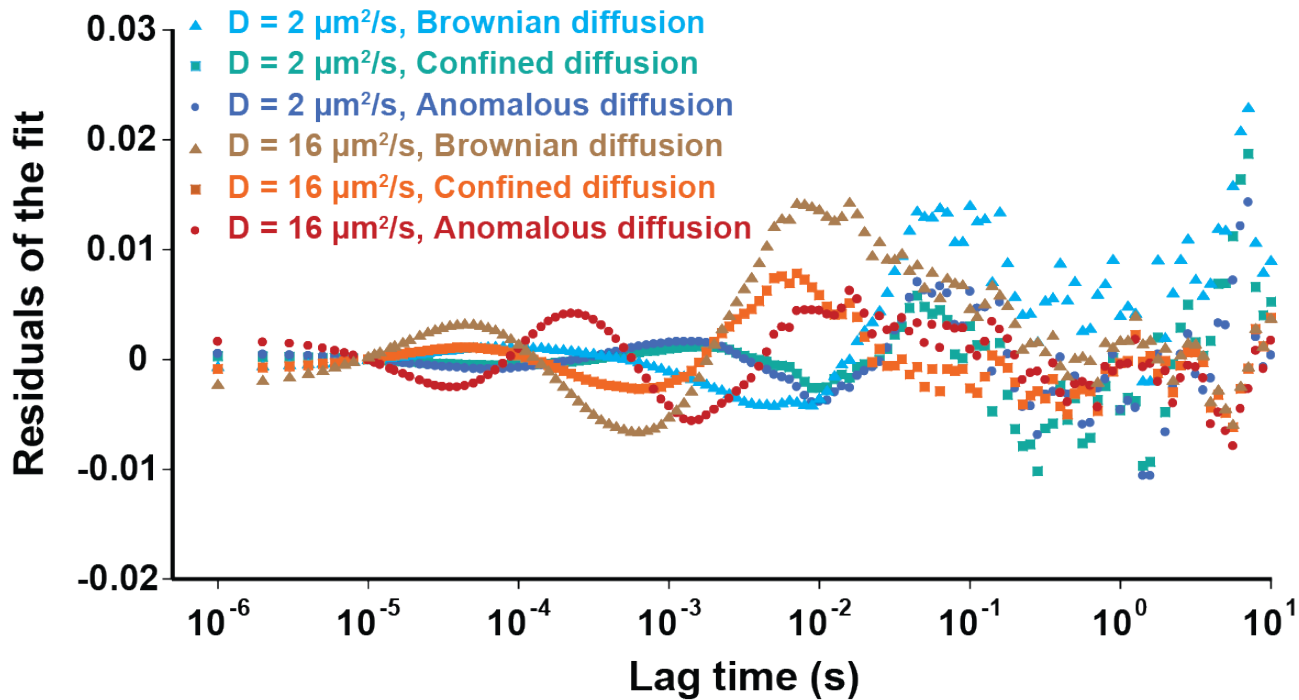

Supplement: supp [file elife_poa_e82654_Figure_2_figure_supplement_6.pdf › elife_poa_e82654_Figure_2_figure_supplement_6.pdf]

A

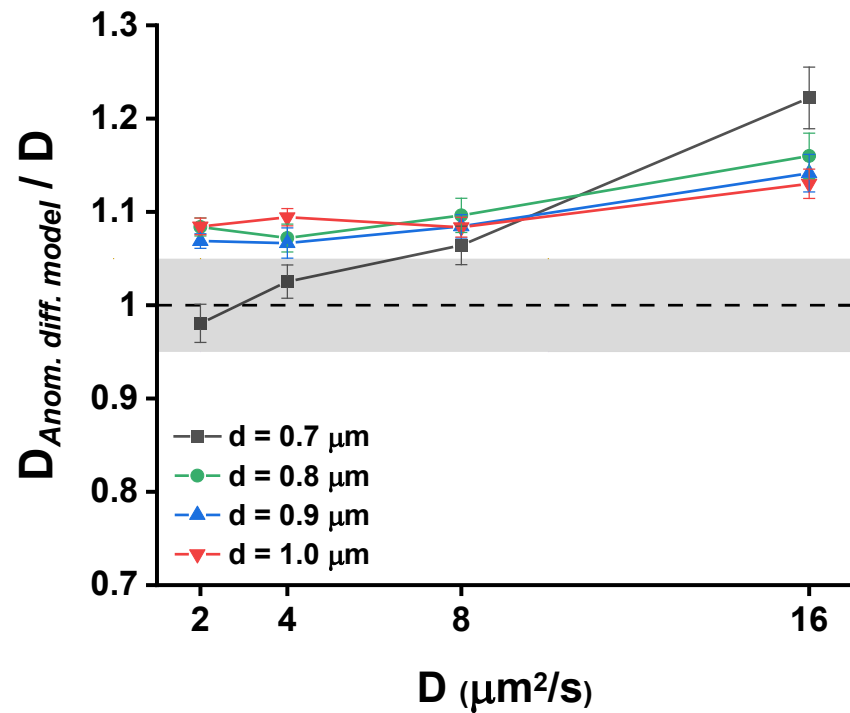

B

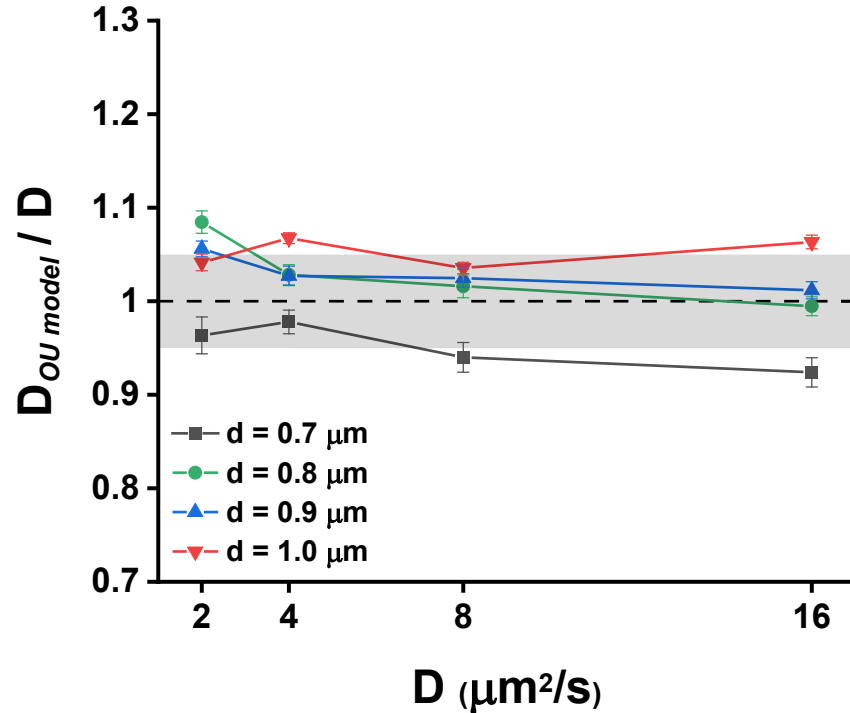

Supplement: supp [file elife_poa_e82654_Figure_2_figure_supplement_7.pdf › elife_poa_e82654_Figure_2_figure_supplement_7.pdf]

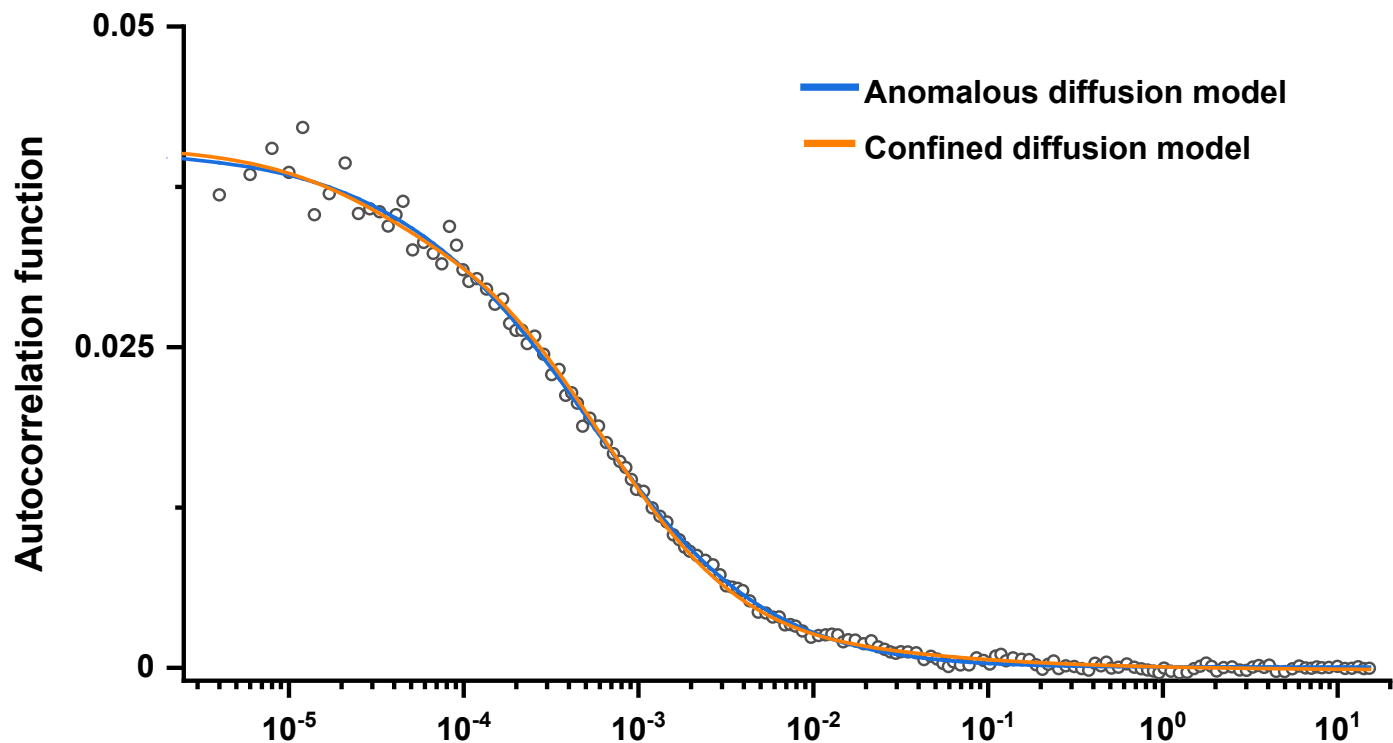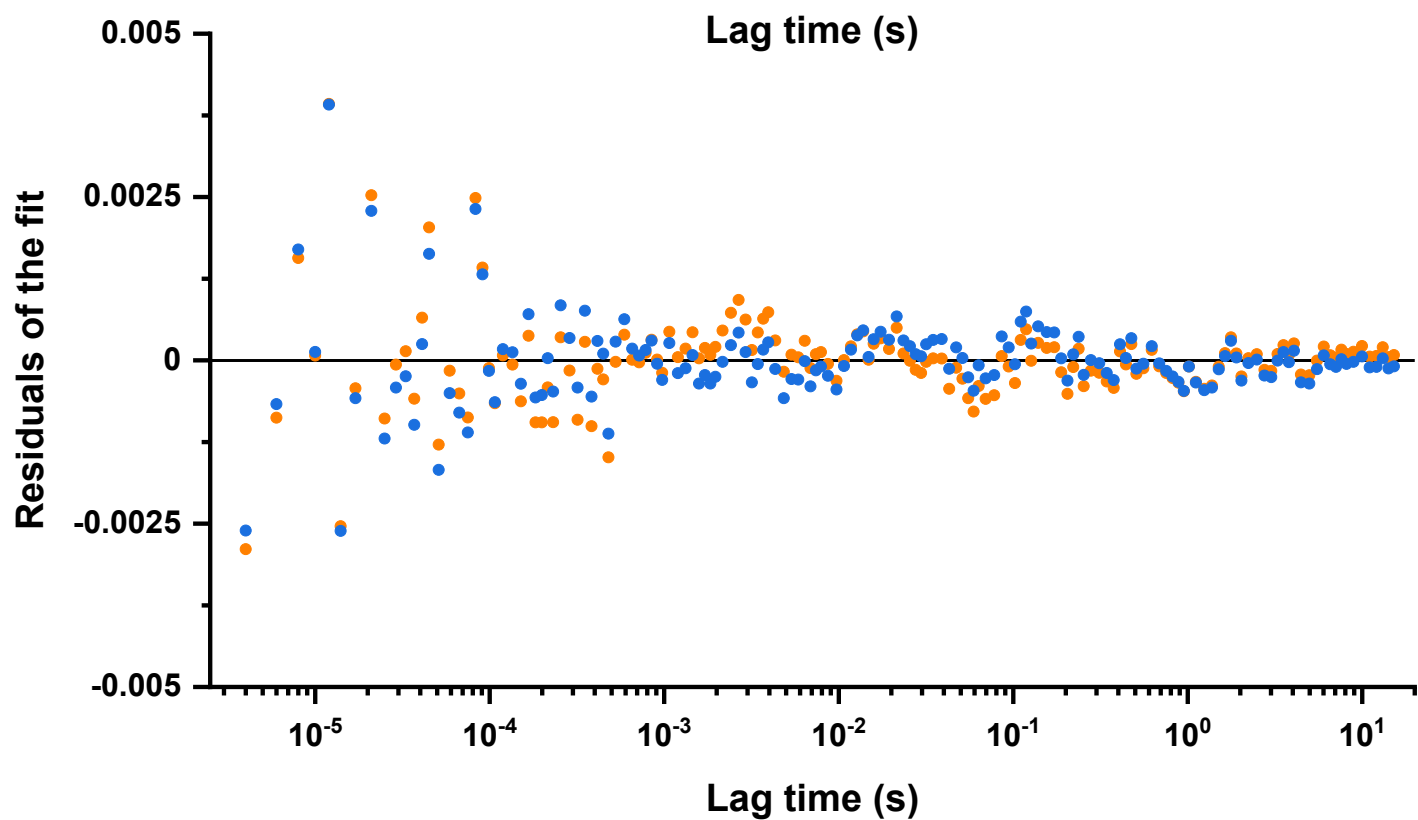

Supplement: supp [file elife_poa_e82654_Figure_2_figure_supplement_8.pdf › elife_poa_e82654_Figure_2_figure_supplement_8.pdf]

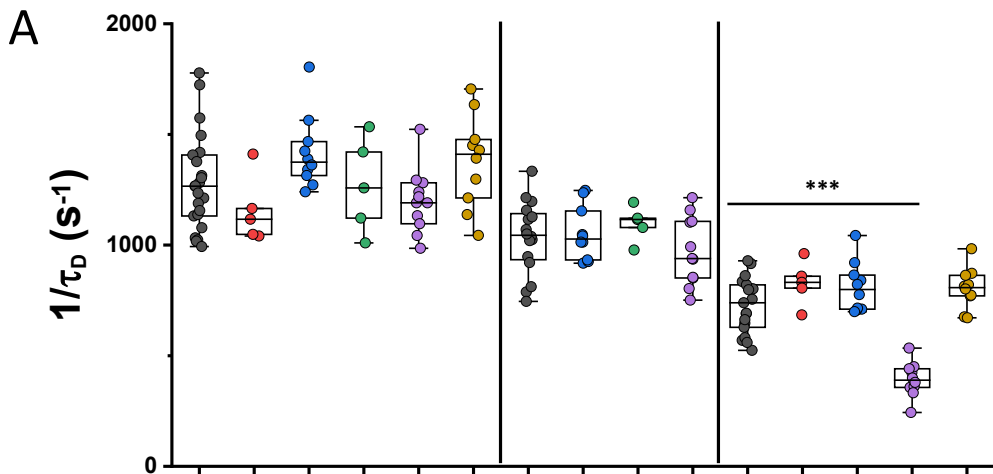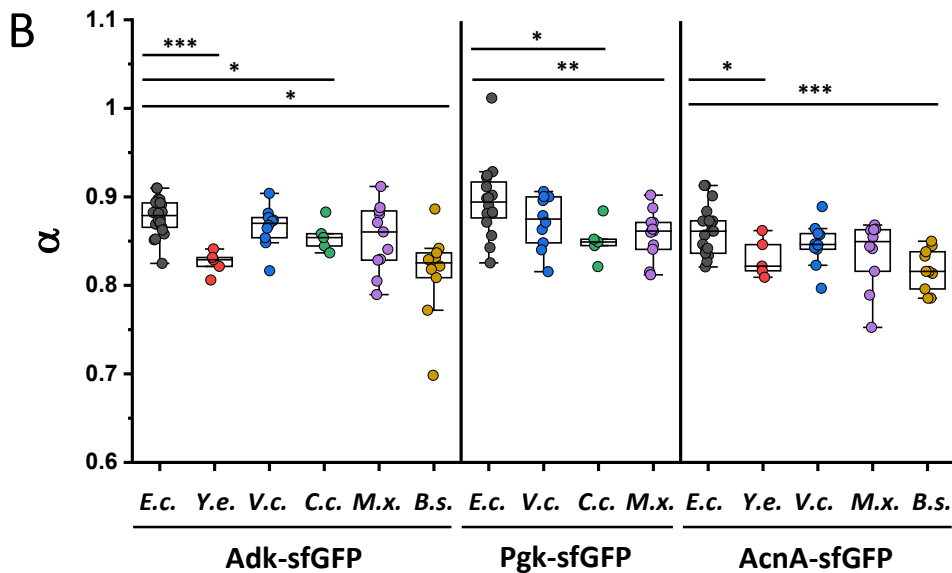

Supplement: supp [file elife_poa_e82654_Figure_4_figure_supplement_1.pdf › elife_poa_e82654_Figure_4_figure_supplement_1.pdf]

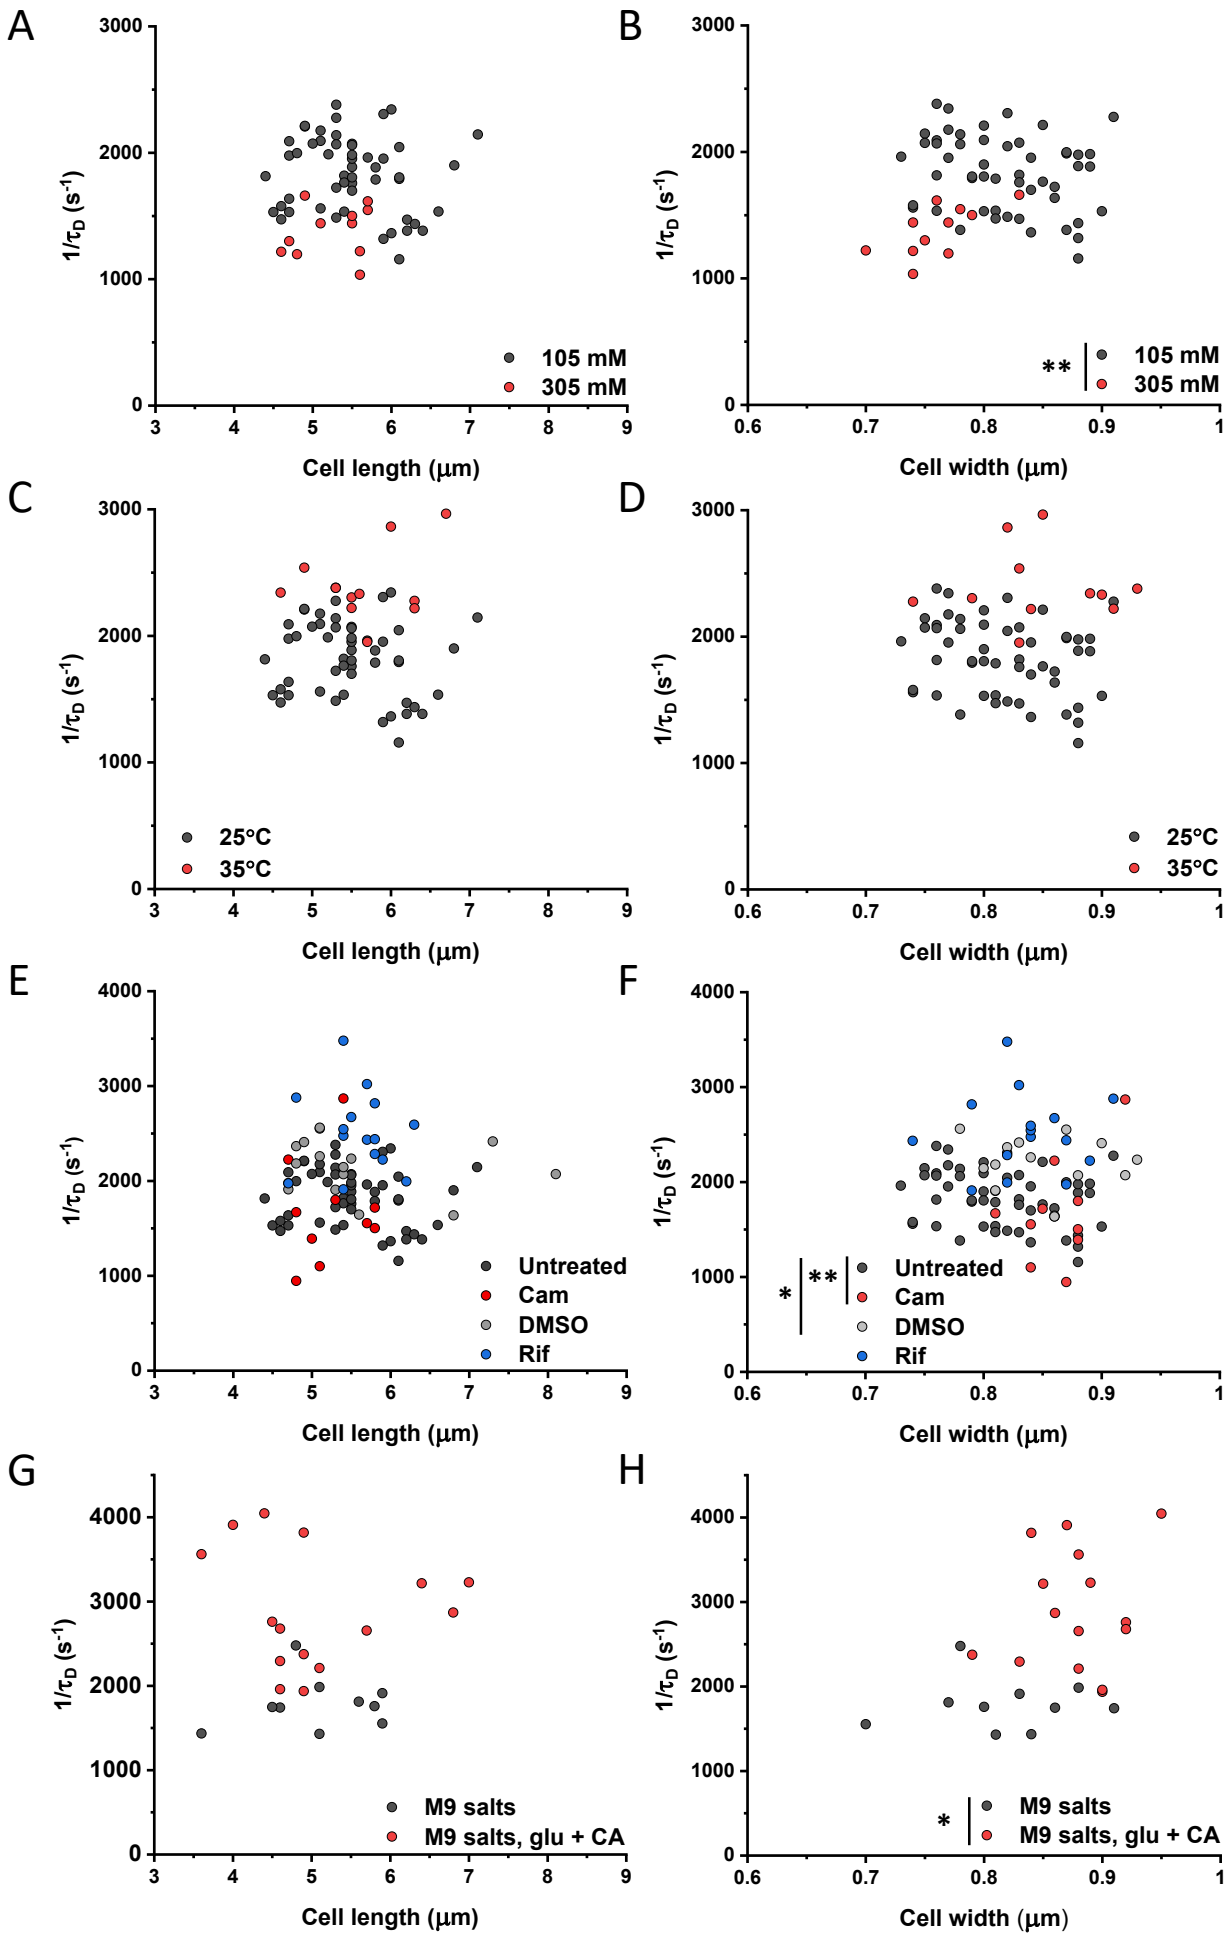

Supplement: supp [file elife_poa_e82654_Figure_5_figure_supplement_1.pdf › elife_poa_e82654_Figure_5_figure_supplement_1.pdf]

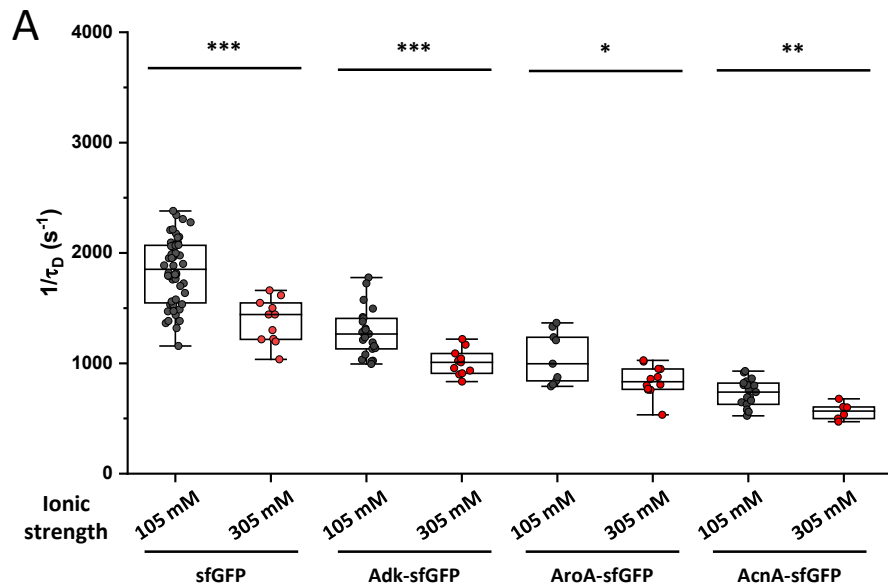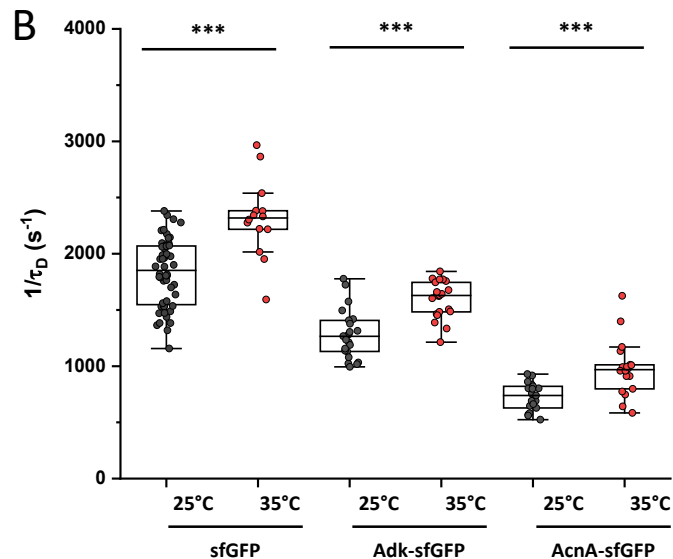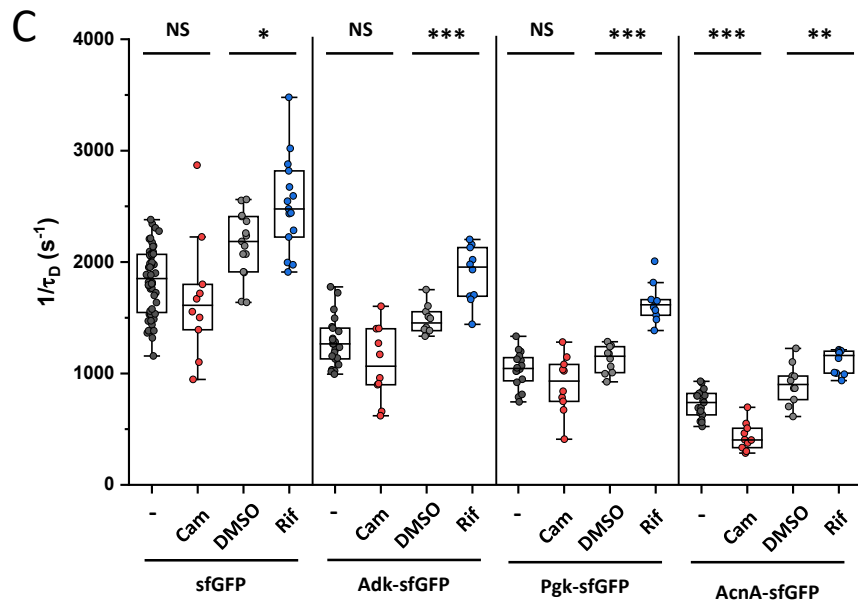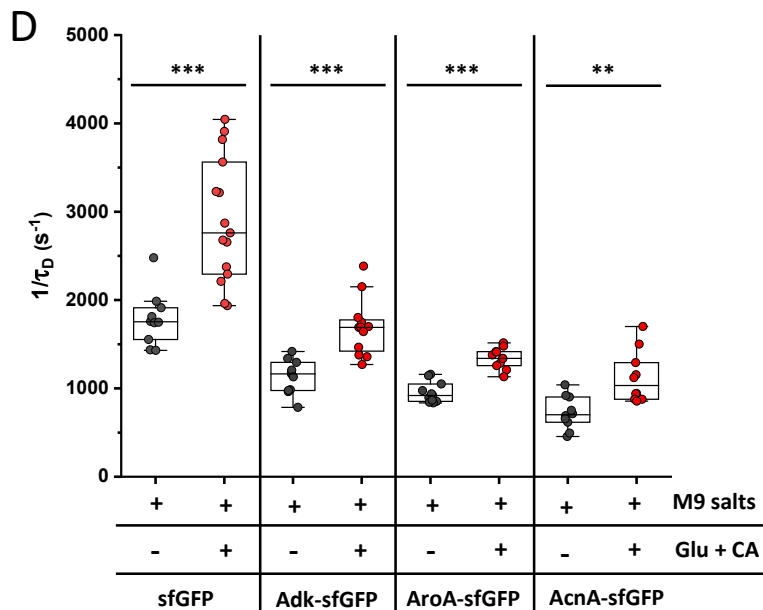

Supplement: supp [file elife_poa_e82654_Figure_5_figure_supplement_2.pdf › elife_poa_e82654_Figure_5_figure_supplement_2.pdf]

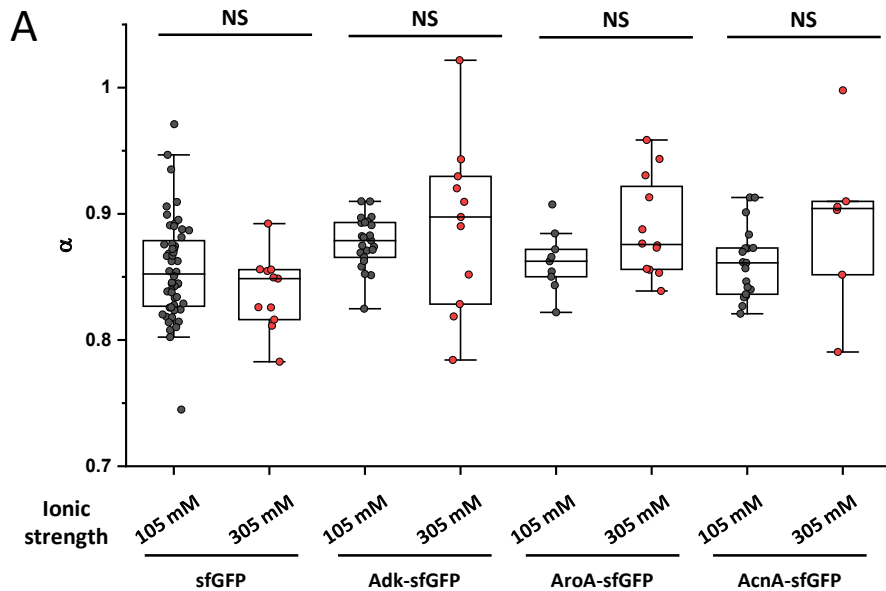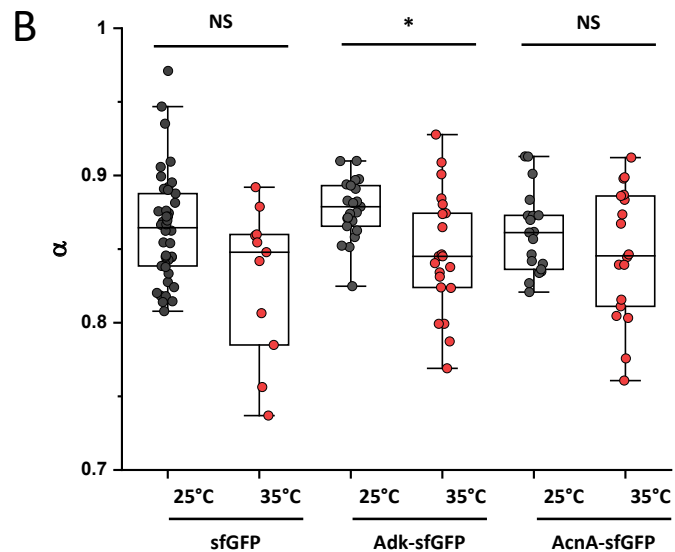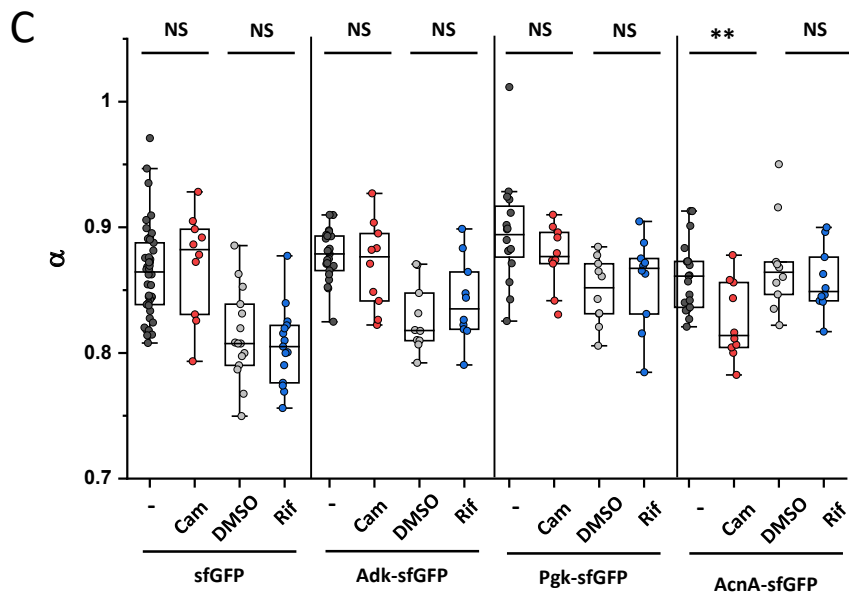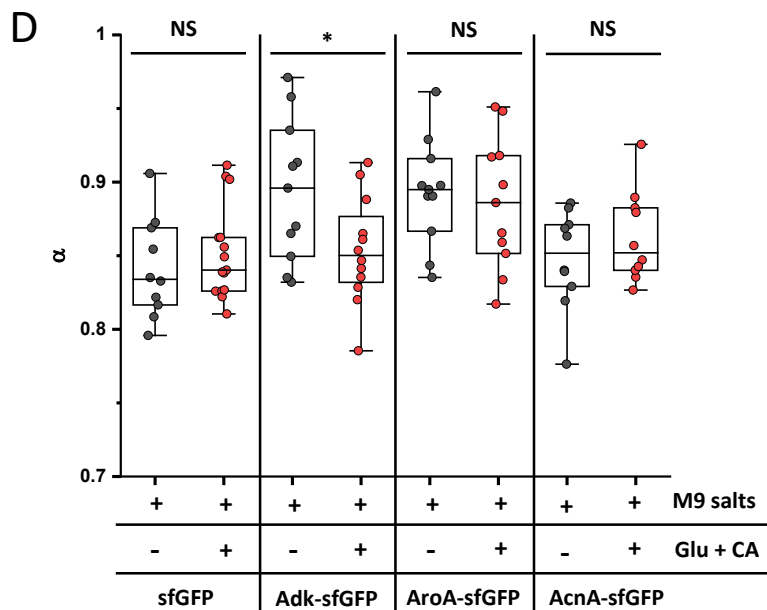

Supplement: supp [file elife_poa_e82654_Figure_5_figure_supplement_3.pdf › elife_poa_e82654_Figure_5_figure_supplement_3.pdf]

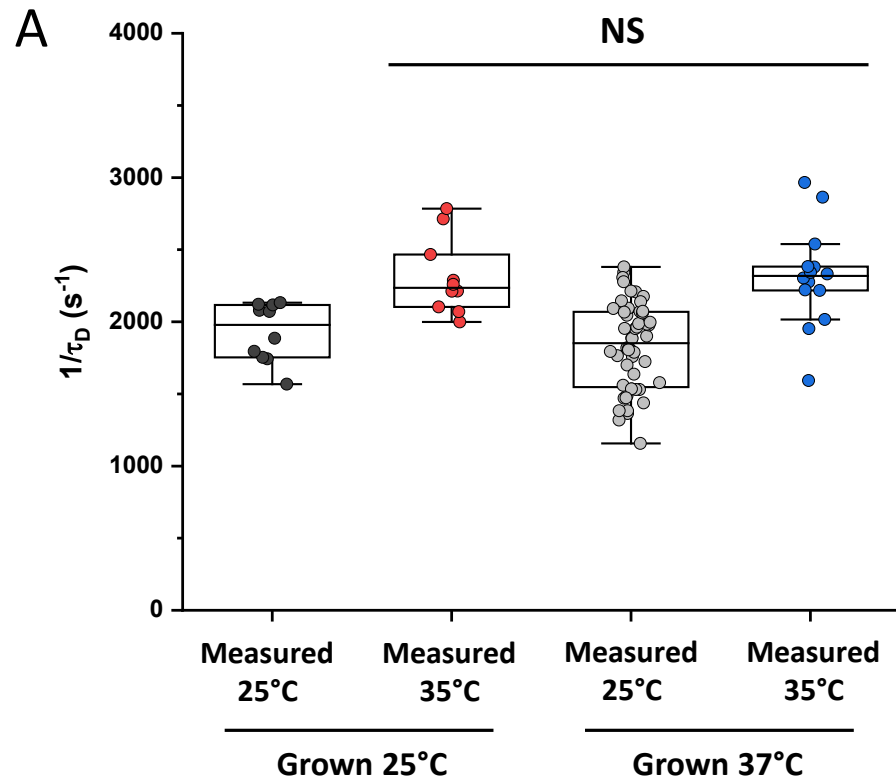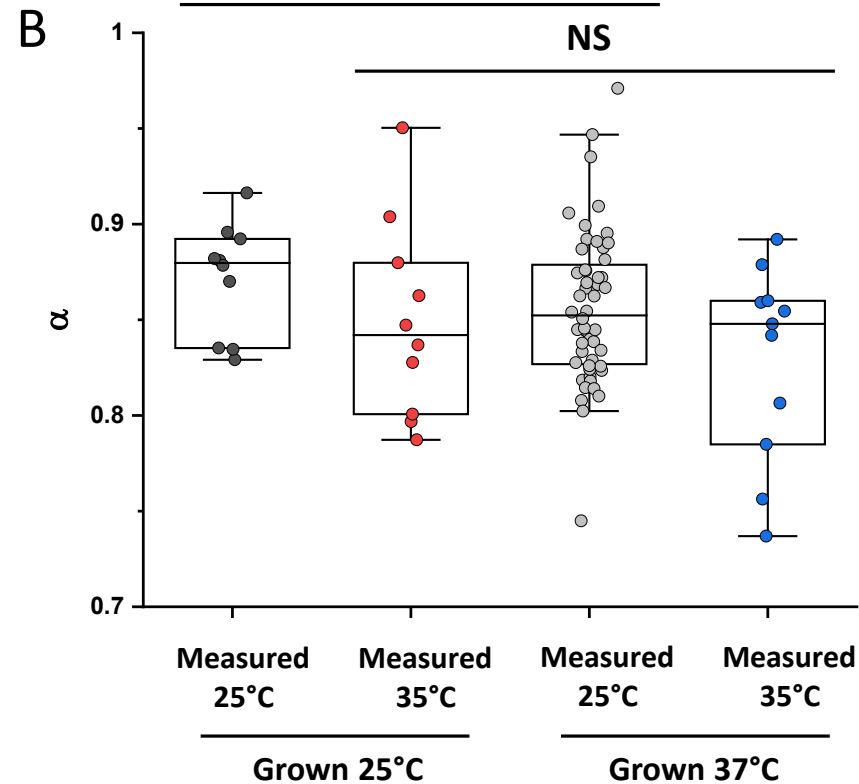

Supplement: supp [file elife_poa_e82654_Figure_5_figure_supplement_4.pdf › elife_poa_e82654_Figure_5_figure_supplement_4.pdf]

A

Cam

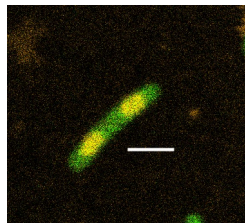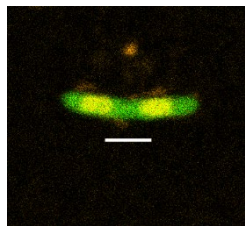

Sytox orange  
sfGFP

B

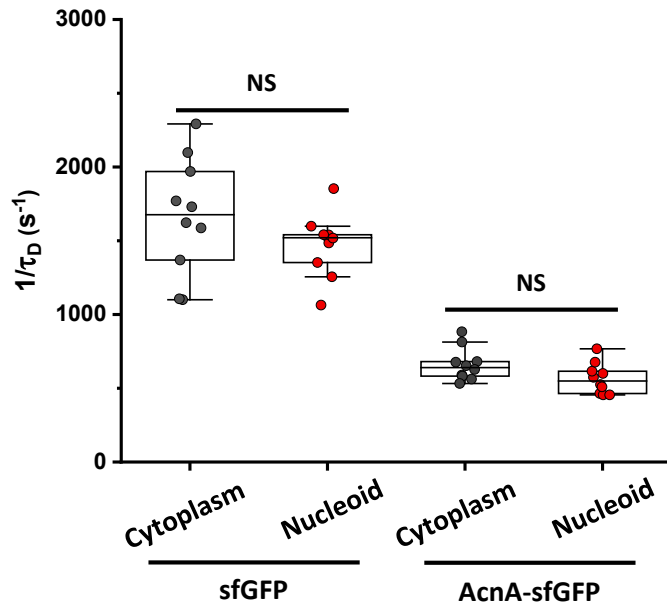

C

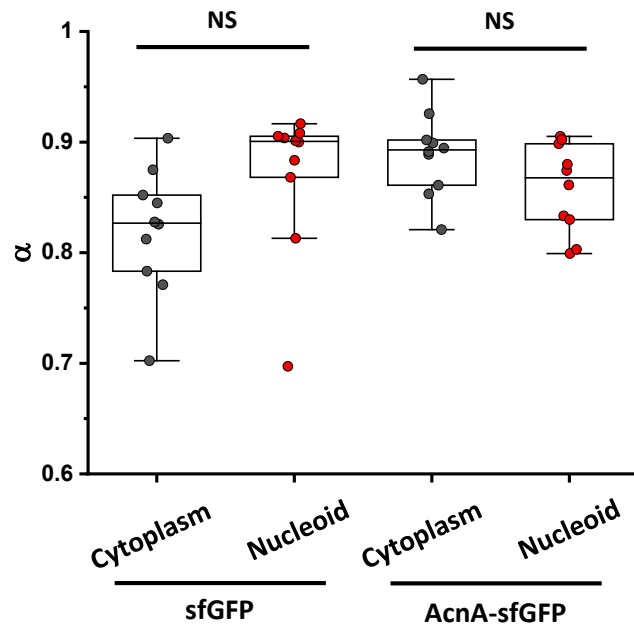

Supplement: supp [file elife_poa_e82654_Figure_5_figure_supplement_5.pdf › elife_poa_e82654_Figure_5_figure_supplement_5.pdf]

A

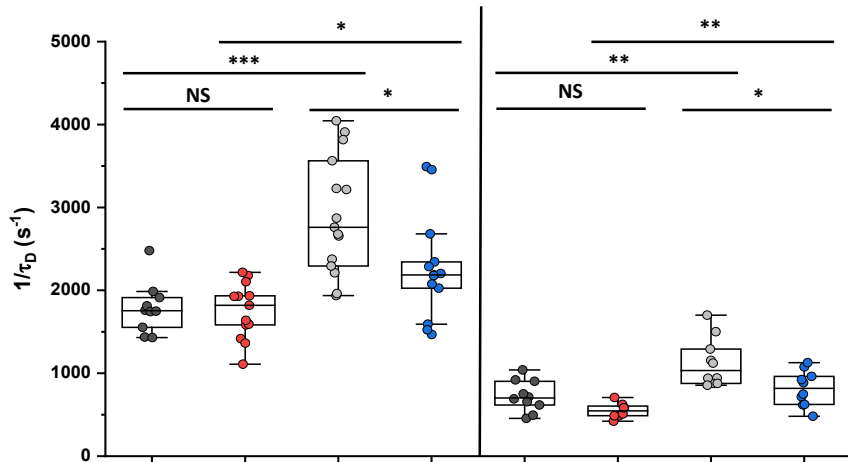

B

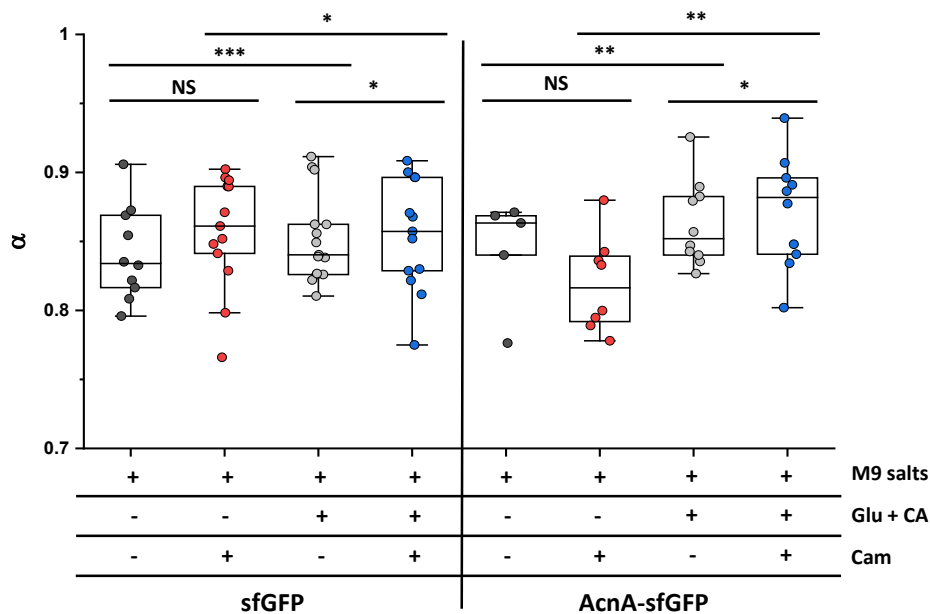

Supplement: supp [file elife_poa_e82654_Figure_5_figure_supplement_6.pdf › elife_poa_e82654_Figure_5_figure_supplement_6.pdf]

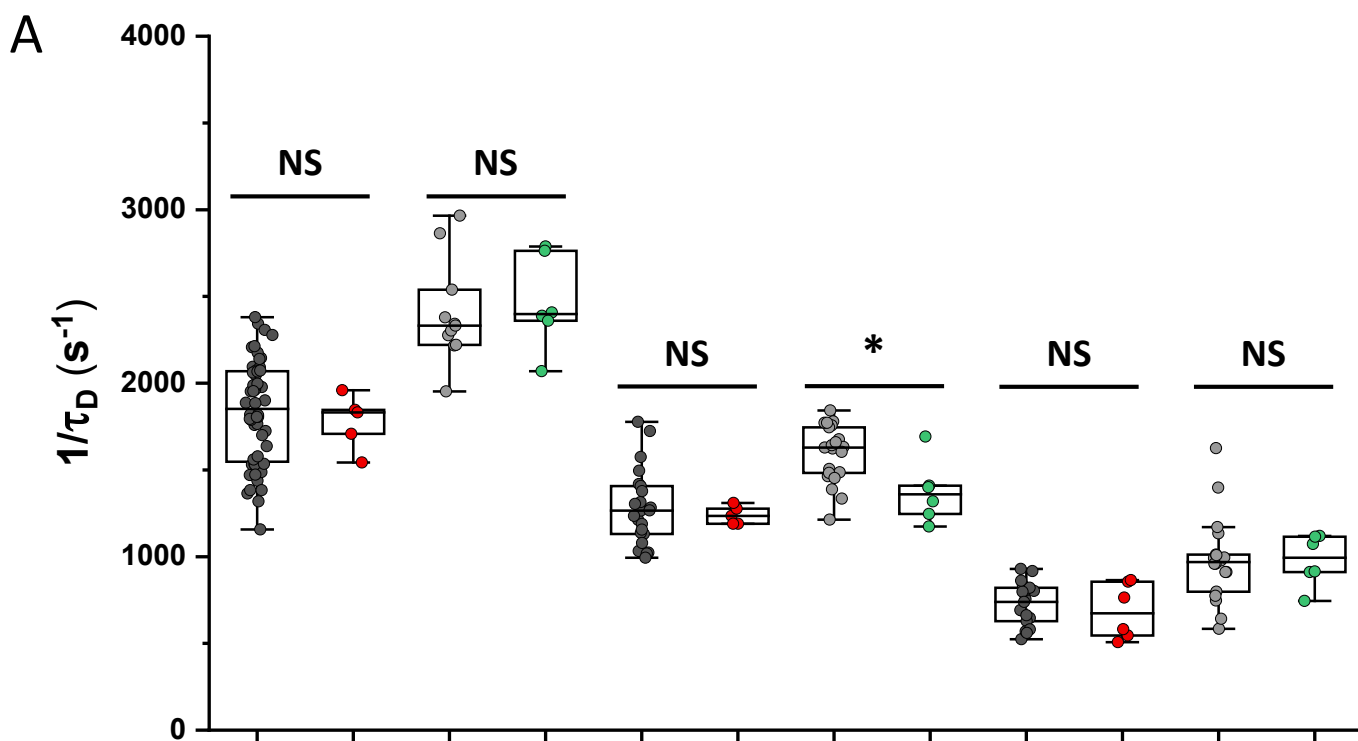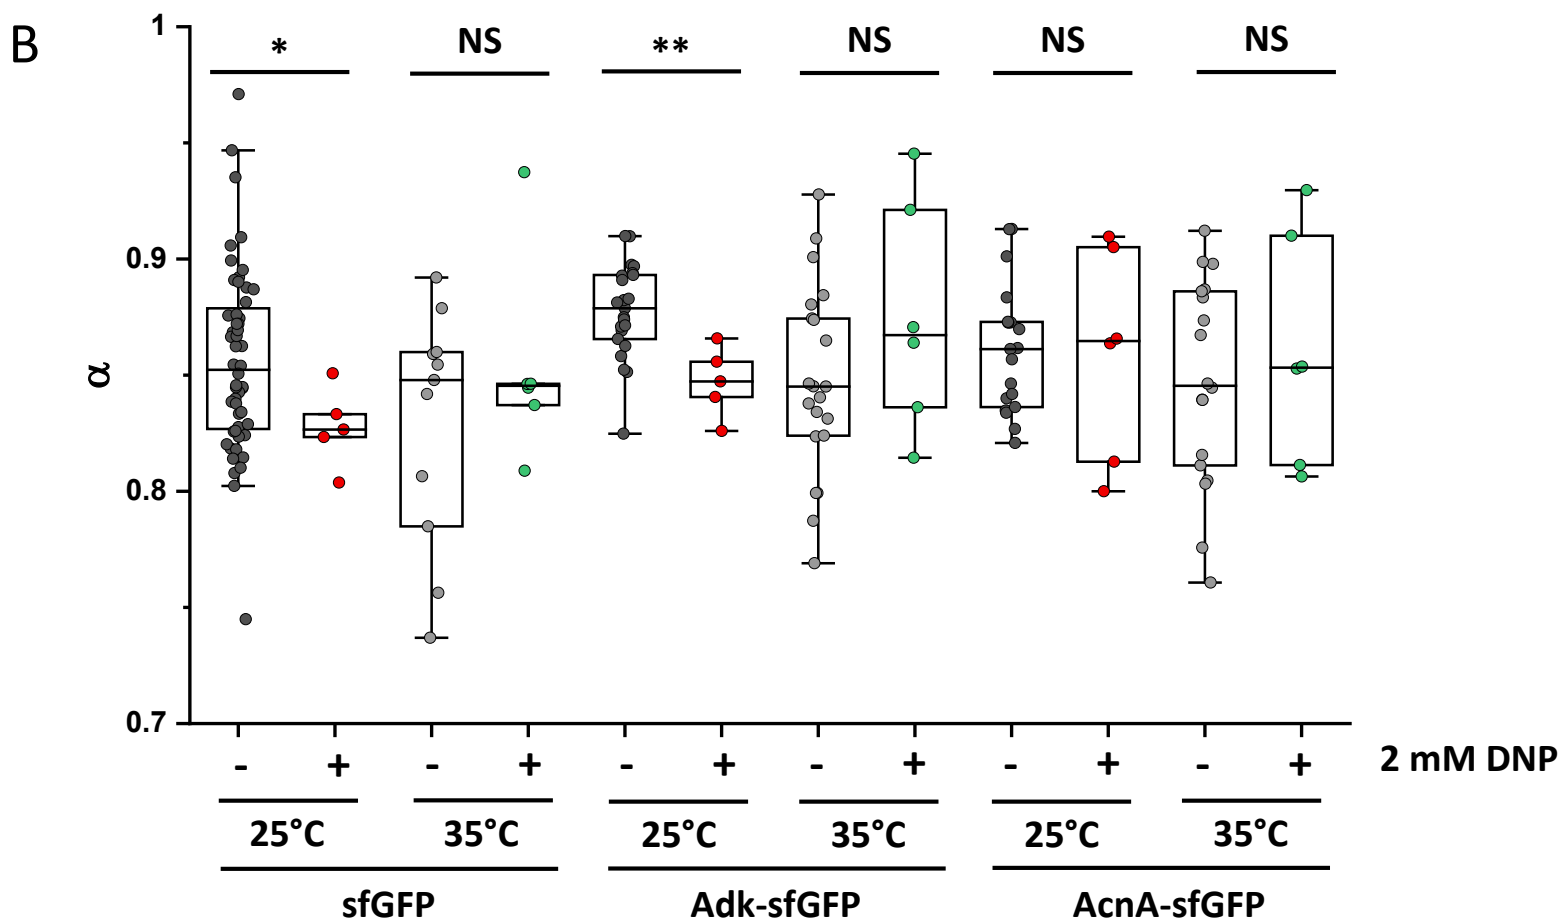

Supplement: supp [file elife_poa_e82654_Figure_5_figure_supplement_7.pdf › elife_poa_e82654_Figure_5_figure_supplement_7.pdf]
